# Supplementary material for: Progressive axonopathy when oligodendrocytes lack the myelin protein CMTM5
Source: eLife journal article supplement (doi:10.7554/elife.75523), 2022-02-28
Supplement: data1 [file Source Data Blots combined.xlsx]

## Sheet: Figure 1 A
Figure 1 A

## Sheet: Figure 1 C
Figure 1 C

## Sheet: Figure 1 D
Figure 1 D

## Sheet: Figure 2 A
Figure 2 A

## Sheet: Figure 2O
Figure 2 O

## Sheet: Figure 6 A
Figure 6 A

## Sheet: Figure 6 D
Figure 6 D

## Sheet: Figure 6 Supplement 1 A
Figure 6 Supplement 1 A

## Sheet: Figure 6 Supplement 1 B
Figure 6 Supplement 1 B
