# Supplementary material for: Progressive axonopathy when oligodendrocytes lack the myelin protein CMTM5
Source: eLife. 2022 Mar 11;11:e75523. doi: 10.7554/eLife.75523 (PMC8916772; doi:10.7554/eLife.75523)
Supplement: Figure 1—figure supplement 1—source data 1. [file elife-75523-fig1-figsupp1-data1.xlsx]

## Sheet: Sheet1
Fig 1 S1 A
mRNA abundance of Cmtms family members in the cortex
Cmtm1	Cmtm2a	Cmtm2b	Cmtm3	Cmtm4	Cmtm5	Cmtm6	Cmtm7	Cmtm8
0.1	0.1	0.1	1.06058	0.926019	594.916	5.34624	2.12532	0.119003
0.1	0.1	0.1	2.33146	2.07105	538.468	9.24357	1.85337	0.226918
Fig 1 S1 B
Cmtm5 RNA abundance in Cortex
OPC	NFO	MO	Astrocytes	Neurons	Microglia	Endothelial
61.2963	239.685	594.916	79.9518	2.97601	3.88711	1.12063
71.7277	257.191	538.468	64.4455	5.49939	7.32059	0.732007
