# Supplementary material for: Progressive axonopathy when oligodendrocytes lack the myelin protein CMTM5
Source: eLife. 2022 Mar 11;11:e75523. doi: 10.7554/eLife.75523 (PMC8916772; doi:10.7554/eLife.75523)
Supplement: Figure 2—figure supplement 1—source data 1. [file elife-75523-fig2-figsupp1-data1.xlsx]

## Sheet: Sheet1
Fig 2 S1 B
FA
CC		Fim		Thal		Cort		AC
CTRL	cko	CTRL	cko	CTRL	cko	CTRL	cko	CTRL	cko
0.520362	0.486597	0.670245	0.706718	0.265561	0.312473	0.085642	0.086358	0.701286	0.707423
0.54998	0.554363	0.739312	0.771703	0.31464	0.274459	0.096523	0.101565	0.72948	0.879876
0.570907	0.522469	0.727418	0.738087	0.243598	0.765115	0.098412	0.086997	0.9409	0.827651
0.593107	0.539647	0.728196	0.765115	0.25578	0.25578	0.103459	0.097771	0.588567	0.911248
Fig 2 S1 C
MD
CC		Fim		Thal		Cort		AC
CTRL	cko	CTRL	cko	CTRL	cko	CTRL	cko	CTRL	cko
0.593	0.552	0.856	0.651	0.695	0.711	0.631	0.612	0.657	0.588
0.541	0.541	0.653	0.579	0.64	0.624	0.609	0.59	0.739	0.326
0.506	0.583	0.686	0.715	0.606	0.653	0.599	0.618	0.291	0.468
0.547	0.541	0.703	0.664	0.626	0.578	0.589	0.565	0.607	0.301
Fig 2 S1 D
AD
CC		Fim		Thal		Cort		AC
CTRL	cko	CTRL	cko	CTRL	cko	CTRL	cko	CTRL	cko
0.963	0.871	1.636	1.292	0.856	0.898	0.685	0.664	1.28	1.144
0.903	0.916	1.342	1.217	0.813	0.832	0.666	0.649	1.446	0.73
0.866	0.964	1.377	1.453	0.801	0.84	0.657	0.671	0.75	0.985
0.969	0.901	1.42	1.394	0.779	0.74	0.65	0.619	1.045	0.747
Fig 2 S1 E
RD
CC		Fim		Thal		Cort		AC
CTRL	cko	CTRL	cko	CTRL	cko	CTRL	cko	CTRL	cko
0.407	0.393	0.466	0.33	0.615	0.618	0.604	0.586	0.345	0.31
0.36	0.353	0.309	0.26	0.553	0.52	0.58	0.56	0.386	0.124
0.326	0.392	0.34	0.346	0.508	0.559	0.571	0.592	0.0609	0.209
0.337	0.361	0.345	0.299	0.549	0.498	0.559	0.539	0.387	0.0784
Fig 2 S1 F
MTsaT
CC		Fim		Thal		Cort		AC
CTRL	cko	CTRL	cko	CTRL	cko	CTRL	cko	CTRL	cko
0.008781	0.009203	0.009094	0.009452	0.004985	0.005222	0.004513	0.004683	0.008999	0.009265
0.00875	0.008834	0.008413	0.00937	0.004752	0.004942	0.004074	0.004375	0.008933	0.00917
0.008562	0.009006	0.008694	0.008459	0.004179	0.004677	0.003918	0.004032	0.008281	0.008531
0.009112	0.007541	0.008701	0.007944	0.004734	0.004205	0.004289	0.003496	0.008795	0.008039
