# Supplementary material for: Progressive axonopathy when oligodendrocytes lack the myelin protein CMTM5
Source: eLife. 2022 Mar 11;11:e75523. doi: 10.7554/eLife.75523 (PMC8916772; doi:10.7554/eLife.75523)
Supplement: Figure 2—source data 1. [file elife-75523-fig2-data1.xlsx]

## Sheet: Table legend
Figure 2 source data 1. Label-free quantification of proteins in CNS myelin fractions from Cmtm5 cKO and control mice
Identification and quantification data of proteins detected in myelin by DRE-UDMSe. For each of the two conditions, tryptic peptides derived from two technical replicates (replicate digestion) per each of three biological replicates were analyzed by LC-MS (12 runs in total). Proteins (FDR < 1%; 2 peptides/protein) and peptides (FDR < 1%; ≥6 amino acids) were identified by database search against …
Sheet 1	1 all proteins CTRL vs KO	Differential LC-MS analysis of control vs. Cmtm5 cKO myelin by DRE-UDMSe
Column descriptions
A	gene name	Gene name as extracted from description (column B)
B	description	Protein description as parsed from UniprotKB/SwissProt mouse source database
C	IEP	Calculated isoelectric point
D	mw	Calculated molecular weight (Da)
E	max score	Maximum identification score provided by PLGS database searching
F	accession	Database accession number as parsed from source database
G	reported peptides	Number of peptides after ISOQuant processing
H	sequence coverage	Sequence coverage of the protein
I	FDR level	FDR rate at protein level
J	entry	Protein entry as parsed from source database
K-V	KO.1 to CTRL.6	Relative protein abundance in ppm for each replicate
W,X	AVERAGE.KO, AVERAGE.CTRL	Average relative protein abundance in ppm for cKO and CTRL group
Y	log2 FC cKO/CTRL	"log2" of fold change as calculated with the R data analysis pipeline (see Statistics section Materials & Methods for details)
Z	minuslog10q.mod	"-log10" of q-value
AA	q.mod	q-value as calculated with the R data analysis pipeline (see Statistics section of Materials & Methods for details)
AB	zdist	Length of the segment connecting the two points (0,0) and (x,y) with x = log2(fold change) and y= -log10(q-value) (Euclidian distance)

## Sheet: 1 all proteins CTRL vs KO
gene name	description	IEP	mw	max.score	accession	reported.peptides	sequence.coverage	FDR.level	entry	KO.1	KO.2	KO.3	KO.4	KO.5	KO.6	CTRL.1	CTRL.2	CTRL.3	CTRL.4	CTRL.5	CTRL.6	AVERAGE.KO	AVERAGE.CTRL	log2 FC KO/CTRL	minuslog10q.mod	q.mod	zdist
Psat1	Phosphoserine aminotransferase OS=Mus musculus GN=Psat1 PE=1 SV=1	8.08	40757.8	1088.85	Q99K85	12	40	0	SERC_MOUSE	962.261	875.893	831.859	801.07	850.048	986.968	1442.05	1528.58	2251.26	1782.14	1329.62	1312.61	884.683	1607.71	-0.838948	2.63899	0.0022962	2.76913
Cnp	2',3'-cyclic-nucleotide 3'-phosphodiesterase OS=Mus musculus GN=Cnp PE=1 SV=3	9.26	47522.6	30442.3	P16330	32	75.24	0	CN37_MOUSE	31065.2	30738.7	25774.9	28130.9	28296.7	19191.1	44790.5	46069.4	44338	46919	47444.8	44405.9	27199.6	45661.3	-0.764695	2.63899	0.0022962	2.74755
Epb41l2	Band 4.1-like protein 2 OS=Mus musculus GN=Epb41l2 PE=1 SV=2	5.15	110453	308.673	O70318	7	10.53	0	E41L2_MOUSE	478.451	432.407	441.541	476.112	466.925	460.46	579.729	653.193	783.913	613.535	679.708	604.454	459.316	652.422	-0.500067	2.63899	0.0022962	2.68595
Abat	4-aminobutyrate aminotransferase, mitochondrial OS=Mus musculus GN=Abat PE=1 SV=1	8.01	57136.3	398.889	P61922	7	23.4	0	GABT_MOUSE	4110.8	4033.5	7410.96	2978.4	6368.55	15658.9	3470.13	2989.36	1627.63	1048.86	2027.14	1798.1	6760.18	2160.2	1.52386	1.69143	0.0203505	2.27664
Slc44a1	Choline transporter-like protein 1 OS=Mus musculus GN=Slc44a1 PE=1 SV=3	8.72	74606.9	2546.74	Q6X893	16	26.8	0	CTL1_MOUSE	9461.57	8990.34	15287.7	7818.98	13684.2	26235.4	7267.2	6994.88	2822.69	2717.63	5734.35	4526.55	13579.7	5010.55	1.41574	1.74273	0.0180832	2.24531
Ldhb	L-lactate dehydrogenase B chain OS=Mus musculus GN=Ldhb PE=1 SV=2	5.63	36857.5	1087.63	P16125	10	36.23	0	LDHB_MOUSE	284.791	272.081	262.148	239.836	327.988	310.52	338.971	342.357	444.946	455.586	397.849	435.944	282.894	402.609	-0.506613	2.02311	0.00948173	2.08558
Rap2a	Ras-related protein Rap-2a OS=Mus musculus GN=Rap2a PE=1 SV=2	4.53	20870.6	914.176	Q80ZJ1	6	45.9	0	RAP2A_MOUSE	72.259	76.3366	83.1022	82.0801	75.9694	82.9996	89.8242	103.092	134.941	102.226	115.842	116.603	78.7912	110.422	-0.477092	2.02311	0.00948173	2.07861
Gjc3	Gap junction gamma-3 protein OS=Mus musculus GN=Gjc3 PE=1 SV=2	8.37	30805.9	844.392	Q921C1	6	24.91	0	CXG3_MOUSE	288.85	291.847	312.495	260.089	255.717	253.734	330.118	360.025	445.367	412.579	393.953	346.915	277.122	381.493	-0.457852	2.02311	0.00948173	2.07427
Tst	Thiosulfate sulfurtransferase OS=Mus musculus GN=Tst PE=1 SV=3	7.85	33694.1	415.67	P52196	4	20.88	0	THTR_MOUSE	163.301	148.782	159.947	149.948	163.009	135.221	98.4945	139.689	114.082	105.488	110.188	117.204	153.368	114.191	0.431099	2.02311	0.00948173	2.06853
Bsg	Basigin OS=Mus musculus GN=Bsg PE=1 SV=2	5.46	42901	282.001	P18572	2	5.91	0	BASI_MOUSE	231.405	198.965	219.868	221.573	255.325	256.54	298.84	283.965	298.438	347.423	320.105	292.972	230.613	306.957	-0.414939	2.02311	0.00948173	2.06523
Ndrg1	Protein NDRG1 OS=Mus musculus GN=Ndrg1 PE=1 SV=1	5.65	43465	4628.88	Q62433	12	53.81	0	NDRG1_MOUSE	1151.81	1036.66	1025.03	1091.07	1115.58	1236.22	1471.5	1456.44	1788.95	1420.26	1361.08	1325.25	1109.39	1470.58	-0.402508	2.02311	0.00948173	2.06276
Nefh	Neurofilament heavy polypeptide OS=Mus musculus GN=Nefh PE=1 SV=3	5.56	117280	3848.79	P19246	27	26.33	0	NFH_MOUSE	768.795	681.027	908.128	1026.81	1728.6	1807.88	1643.86	1508.55	3795.94	2583.94	2730.64	2398.79	1153.54	2443.62	-1.11772	1.69143	0.0203505	2.02737
Nefl	Neurofilament light polypeptide OS=Mus musculus GN=Nefl PE=1 SV=5	4.41	61565.6	11256.9	P08551	34	62.98	0	NFL_MOUSE	1611.71	1613.15	1565.4	1874.87	3504.06	3470.9	2996.66	3271.07	5756.5	4955.23	4995.07	4863.77	2273.35	4473.05	-1.03228	1.74273	0.0180832	2.02551
Ina	Alpha-internexin OS=Mus musculus GN=Ina PE=1 SV=3	5.18	55553.7	10111	P46660	28	56.69	0	AINX_MOUSE	1116.29	1171.57	1067.91	1371.48	1933.67	1956.71	1839.07	1875.54	3155.02	2856.92	2667.64	2357.44	1436.27	2458.61	-0.792287	1.74273	0.0180832	1.91437
Arhgdia	Rho GDP-dissociation inhibitor 1 OS=Mus musculus GN=Arhgdia PE=1 SV=3	4.91	23464.5	1783.01	Q99PT1	5	40.69	0	GDIR1_MOUSE	180.404	179.264	157.304	151.081	176.434	208.456	208.988	203.48	266.727	287.709	258.389	245.065	175.491	245.06	-0.478321	1.83134	0.0147457	1.89277
Syt1	Synaptotagmin-1 OS=Mus musculus GN=Syt1 PE=1 SV=1	8.75	47760.2	963.823	P46096	10	25.89	0	SYT1_MOUSE	257.357	235.653	216.536	229.282	229.198	231.787	365.336	260.176	344.658	355.174	282.782	288.464	233.302	316.098	-0.428154	1.83293	0.0146916	1.88227
S100b	Protein S100-B OS=Mus musculus GN=S100b PE=1 SV=2	4.28	10842.1	2162.65	P50114	2	40.22	0	S100B_MOUSE	104.434	104.489	89.9567	73.5783	27.5088	61.8105	137.664	NA	145.098	136.059	168.244	165.149	76.9629	150.443	-1.0876	1.51926	0.0302511	1.86843
Hspa1l	Heat shock 70 kDa protein 1-like OS=Mus musculus GN=Hspa1l PE=1 SV=4	5.83	71036.6	1373.1	P16627	5	9.05	0	HS71L_MOUSE	1561.91	1344.77	1853.23	1531.03	1617.22	3005.34	1071.98	975.641	1121.19	1074.07	1271.39	1121.35	1818.92	1105.94	0.668631	1.74273	0.0180832	1.86659
Slc6a9	Sodium- and chloride-dependent glycine transporter 1 OS=Mus musculus GN=Slc6a9 PE=1 SV=3	7.68	77513.8	294.437	P28571	4	7.23	0	SC6A9_MOUSE	375.383	447.388	454.132	452.854	422.206	474.667	976.021	517.616	558.112	649.216	654.937	597.253	437.772	658.859	-0.561805	1.74273	0.0180832	1.83104
Kras	GTPase KRas OS=Mus musculus GN=Kras PE=1 SV=1	6.37	21941	887.988	P32883	6	41.8	0	RASK_MOUSE	105.401	116.141	116.577	126.974	123.624	136.126	167.098	131.859	231.064	166.587	161.723	162.947	120.807	170.213	-0.47895	1.74273	0.0180832	1.80734
Anln	Anillin OS=Mus musculus GN=Anln PE=1 SV=2	7	124277	535.63	Q8K298	21	23.55	0	ANLN_MOUSE	729.146	743.861	772.848	726.495	1021.73	911.471	980.918	969.795	1097.33	1145.45	1301.85	1324.59	817.591	1136.66	-0.477005	1.74273	0.0180832	1.80683
Nefm	Neurofilament medium polypeptide OS=Mus musculus GN=Nefm PE=1 SV=4	4.56	96030.3	6988.46	P08553	32	41.27	0	NFM_MOUSE	2765.48	2630.44	2319.09	3084.27	6215.24	5384.56	5106.02	4446.17	9343.69	7919.33	8023.4	6854.59	3733.18	6948.87	-0.95491	1.51926	0.0302511	1.79444
Sept4	Septin-4 OS=Mus musculus GN=Sept4 PE=1 SV=1	5.48	55392.2	2559.9	P28661	11	33.68	0	SEPT4_MOUSE	765.024	827.554	727.355	874.276	900.034	912.412	962.808	974.058	1242.82	1172.37	1129.41	1041.09	834.443	1087.09	-0.380148	1.74273	0.0180832	1.78371
Nsf	Vesicle-fusing ATPase OS=Mus musculus GN=Nsf PE=1 SV=2	6.52	83183.9	2612.98	P46460	32	48.66	0	NSF_MOUSE	1359.76	1265.17	1404.46	1403.23	1516.01	1445.25	1469.92	1727.5	1894.19	1731.15	1767.34	1727.45	1398.98	1719.59	-0.29582	1.74273	0.0180832	1.76765
Tubb3	Tubulin beta-3 chain OS=Mus musculus GN=Tubb3 PE=1 SV=1	4.63	50875	8397.5	Q9ERD7	20	64.22	0	TBB3_MOUSE	738.349	578.013	704.731	696.027	749.622	599.683	771.935	875.944	959.911	867.527	772.021	970.549	677.737	869.648	-0.360765	1.69143	0.0203505	1.72947
Tuba4a	Tubulin alpha-4A chain OS=Mus musculus GN=Tuba4a PE=1 SV=1	4.75	50665.8	14389.2	P68368	22	58.93	0	TBA4A_MOUSE	6772.3	7061.63	7490.37	6615.56	8038.67	6880.4	8138.31	7490.63	9742.82	10037.6	9713.9	9419.68	7143.16	9090.48	-0.342871	1.69143	0.0203505	1.72583
Anxa5	Annexin A5 OS=Mus musculus GN=Anxa5 PE=1 SV=1	4.62	35809.5	425.14	P48036	5	17.24	0	ANXA5_MOUSE	115.897	104.355	106.048	105.094	157.964	141.716	149.059	138.973	181.636	163.346	182.62	170.143	121.845	164.296	-0.443655	1.59383	0.0254785	1.65442
Rap1a	Ras-related protein Rap-1A OS=Mus musculus GN=Rap1a PE=1 SV=1	6.53	21329.4	7810.29	P62835	10	59.78	0	RAP1A_MOUSE	615.865	590.632	626.669	582.249	564.852	553.331	693.402	777.754	711.154	763.869	714.044	609.62	588.933	711.641	-0.270031	1.62124	0.0239201	1.64357
Rap1b	Ras-related protein Rap-1b OS=Mus musculus GN=Rap1b PE=1 SV=2	5.46	21052.9	6357.61	Q99JI6	8	45.65	0	RAP1B_MOUSE	185.486	178.277	190.696	170.745	169.061	150.145	207.135	237.175	220.955	219.145	209.915	185.799	174.068	213.354	-0.293878	1.60712	0.0247107	1.63376
Actr1a	Alpha-centractin OS=Mus musculus GN=Actr1a PE=1 SV=1	6.18	42727.9	566.458	P61164	6	23.4	0	ACTZ_MOUSE	242.154	215.349	233.831	210.229	241.758	267.654	178.481	191.052	189.883	206.813	203.609	196.741	235.162	194.43	0.271449	1.60712	0.0247107	1.62988
Syt5	Synaptotagmin-5 OS=Mus musculus GN=Syt5 PE=1 SV=1	9.91	43415	443.005	Q9R0N5	2	4.66	0	SYT5_MOUSE	414.214	407.038	266.959	243.471	889.401	1281.49	684.919	804.388	1870.56	1553.81	918.682	894.601	583.762	1121.16	-1.11988	1.14578	0.0714861	1.60217
Atp1a1	Sodium/potassium-transporting ATPase subunit alpha-1 OS=Mus musculus GN=Atp1a1 PE=1 SV=1	5.14	114294	11467.2	Q8VDN2	46	49.36	0	AT1A1_MOUSE	5913.9	5397.17	5447.24	6120.84	5213.56	4583.22	6135.07	6980.55	6536.18	6205.95	6978.01	6722.67	5445.99	6593.07	-0.280029	1.51926	0.0302511	1.54485
Gfap	Glial fibrillary acidic protein OS=Mus musculus GN=Gfap PE=1 SV=4	5.09	49957.2	2441.13	P03995	20	50.7	0	GFAP_MOUSE	425.282	406.318	785.837	711.037	173.529	236.368	326.556	303.232	94.8662	87.939	254.553	205.919	456.395	212.178	1.08584	1.01947	0.095616	1.48942
Uchl1	Ubiquitin carboxyl-terminal hydrolase isozyme L1 OS=Mus musculus GN=Uchl1 PE=1 SV=1	4.97	25180.5	516.16	Q9R0P9	2	17.49	0	UCHL1_MOUSE	122.939	132.527	91.4159	114.712	49.1647	211.555	204.667	NA	207.643	204.342	201.113	161.315	120.386	195.816	-0.825002	1.17638	0.0666226	1.43683
Arl8a	ADP-ribosylation factor-like protein 8A OS=Mus musculus GN=Arl8a PE=1 SV=1	7.83	21618	853.203	Q8VEH3	4	30.11	0	ARL8A_MOUSE	108.46	87.4384	109.511	88.577	96.3638	114.721	75.6359	49.9643	61.7345	70.4383	95.5489	87.4157	100.845	73.4562	0.481552	1.3487	0.0448018	1.43209
Tubb5	Tubulin beta-5 chain OS=Mus musculus GN=Tubb5 PE=1 SV=1	4.59	50127.2	14911.3	P99024	21	59.01	0	TBB5_MOUSE	1049.06	876.424	1035.42	1060.82	1137.83	1127.82	1143.11	1199.26	1464.36	1307.28	1225.73	1288.89	1047.9	1271.44	-0.279614	1.38926	0.0408078	1.41712
Bin1	Myc box-dependent-interacting protein 1 OS=Mus musculus GN=Bin1 PE=1 SV=1	4.77	64698.4	1670.78	O08539	15	39.46	0	BIN1_MOUSE	1304.39	1234.59	995.304	1204.02	1375.19	1198.76	1506.84	1349.56	1935.02	1609.1	1566.68	1337.49	1218.71	1550.78	-0.343368	1.3487	0.0448018	1.39173
Ermn	Ermin OS=Mus musculus GN=Ermn PE=1 SV=1	4.34	32319	1904.13	Q5EBJ4	11	54.09	0	ERMIN_MOUSE	609.05	428.005	481.737	195.28	60.1658	221.142	621.638	NA	855.802	730.135	244.395	628.643	332.563	616.123	-1.11693	0.828144	0.148544	1.39045
Map1b	Microtubule-associated protein 1B OS=Mus musculus GN=Map1b PE=1 SV=2	4.57	271510	181.629	P14873	7	3.45	0	MAP1B_MOUSE	784.561	772.539	932.978	897.661	1076.12	1042.52	974.787	1130.48	1241.55	1107.51	1249.73	1186.12	917.729	1148.36	-0.329953	1.3487	0.0448018	1.38848
Fam177a1	Protein FAM177A1 OS=Mus musculus GN=Fam177a1 PE=1 SV=1	4.33	23749.3	852.208	Q8BR63	4	24.15	0	F177A_MOUSE	118.035	139.625	120.76	146.181	104.576	120.149	171.753	125.858	162.124	177.75	149.386	157.736	124.887	157.435	-0.334268	1.32274	0.0475624	1.36432
Ywhag	14-3-3 protein gamma OS=Mus musculus GN=Ywhag PE=1 SV=2	4.61	28473.7	1320.2	P61982	7	32.39	0	1433G_MOUSE	114.492	115.875	102.92	120.973	119.305	142.83	153.288	118.153	251.26	196.222	161.184	144.02	119.399	170.688	-0.480095	1.24173	0.0573155	1.33131
Rab6a	Ras-related protein Rab-6A OS=Mus musculus GN=Rab6a PE=1 SV=4	5.23	23703.9	1281.69	P35279	4	21.15	0	RAB6A_MOUSE	68.0545	70.0492	80.5438	59.3399	72.6596	82.8551	85.321	70.8319	111.238	98.7619	96.5169	95.236	72.2504	92.9842	-0.358923	1.27279	0.0533596	1.32243
Rab10	Ras-related protein Rab-10 OS=Mus musculus GN=Rab10 PE=1 SV=1	8.57	22769.1	3804.54	P61027	9	41.5	0	RAB10_MOUSE	306.538	262.033	282.312	246.353	270.529	256.15	341.792	289.379	312.883	303.397	327.17	318.122	270.653	315.457	-0.222654	1.27774	0.0527548	1.29699
Dnm3	Dynamin-3 OS=Mus musculus GN=Dnm3 PE=1 SV=1	8.46	97589.8	1147.38	Q8BZ98	17	20.28	0	DYN3_MOUSE	643.325	566.573	960.387	539.901	750.036	543.12	457.52	506.308	466.895	445.987	499.928	570.307	667.224	491.158	0.414158	1.22429	0.0596632	1.29245
Atp1b3	Sodium/potassium-transporting ATPase subunit beta-3 OS=Mus musculus GN=Atp1b3 PE=1 SV=1	8.63	32117.9	2878.16	P97370	9	41.73	0	AT1B3_MOUSE	458.988	621.833	675.591	503.27	579.879	475.126	791.423	719.746	526.96	878.944	652.507	874.284	552.448	740.644	-0.415495	1.21507	0.0609444	1.28414
Cryab	Alpha-crystallin B chain OS=Mus musculus GN=Cryab PE=1 SV=2	6.92	20068.8	4581.07	P23927	7	49.71	0	CRYAB_MOUSE	481.59	497.389	455.881	532.764	339.777	549.501	346.808	213.106	413.089	384.807	381.715	341.343	476.15	346.811	0.471172	1.19296	0.0641264	1.28264
Prdx3	Thioredoxin-dependent peroxide reductase, mitochondrial OS=Mus musculus GN=Prdx3 PE=1 SV=1	7.37	28355.2	885.761	P20108	5	26.46	0	PRDX3_MOUSE	113.547	115.089	114.415	136.799	139.271	150.301	151.651	139.442	190.628	142.955	170.073	159.842	128.237	159.099	-0.311905	1.24173	0.0573155	1.2803
Gnai1	Guanine nucleotide-binding protein G(i) subunit alpha-1 OS=Mus musculus GN=Gnai1 PE=1 SV=1	5.59	40931.4	5974.79	B2RSH2	12	34.46	0	GNAI1_MOUSE	706.69	770.638	812.205	837.573	808.268	794.185	906.839	964.172	745.32	1156.72	1053.18	1072.45	788.26	983.115	-0.306666	1.24173	0.0573155	1.27904
Msn	Moesin OS=Mus musculus GN=Msn PE=1 SV=3	6.18	67881.2	567.636	P26041	9	16.81	0	MOES_MOUSE	66.6959	61.7257	61.541	57.0406	73.1087	70.4416	16.9946	56.165	16.2297	65.2402	52.9802	47.2932	65.0923	42.4838	0.812873	0.984503	0.103633	1.27672
Slc2a1	Solute carrier family 2, facilitated glucose transporter member 1 OS=Mus musculus GN=Slc2a1 PE=1 SV=4	9.04	54326.9	237.07	P17809	2	3.66	0	GTR1_MOUSE	261.668	275.704	284.321	257.973	252.583	261.402	338.192	274.373	350.778	344.196	267.82	358.771	265.609	322.355	-0.270579	1.24647	0.0566927	1.2755
Plcb1	1-phosphatidylinositol 4,5-bisphosphate phosphodiesterase beta-1 OS=Mus musculus GN=Plcb1 PE=1 SV=2	5.73	139252	342.033	Q9Z1B3	18	22.04	0	PLCB1_MOUSE	825	760.153	580.827	597.643	817.536	867.573	890.876	833.818	1151.69	993.546	879.468	905.554	741.456	942.492	-0.355385	1.21507	0.0609444	1.26597
Sept7	Septin-7 OS=Mus musculus GN=Sept7 PE=1 SV=1	8.77	50892.1	4542.12	O55131	19	53.67	0	SEPT7_MOUSE	1435.06	1350.35	1544.07	1629.54	1679.65	1407.34	1712.19	1602.59	1926.74	1970.04	1691.93	1768.29	1507.67	1778.63	-0.239148	1.24173	0.0573155	1.26455
Mag	Myelin-associated glycoprotein OS=Mus musculus GN=Mag PE=1 SV=2	4.85	70115.2	4553.2	P20917	15	30.35	0	MAG_MOUSE	13755.9	11831	11528	12084.2	10073.8	9790.73	15367.8	14609.4	11750.4	13232	13968.6	15875.9	11510.6	14134	-0.298599	1.21507	0.0609444	1.25122
Idh3a	Isocitrate dehydrogenase [NAD] subunit alpha, mitochondrial OS=Mus musculus GN=Idh3a PE=1 SV=1	6.27	40095	1105.84	Q9D6R2	8	21.04	0	IDH3A_MOUSE	444.501	384.841	329.505	372.867	532.399	457.597	490.901	503.182	708.033	545.061	505.408	487.148	420.285	539.955	-0.366093	1.19102	0.0644138	1.24602
Vat1	Synaptic vesicle membrane protein VAT-1 homolog OS=Mus musculus GN=Vat1 PE=1 SV=3	5.92	43324.8	1305.65	Q62465	8	24.63	0	VAT1_MOUSE	428.892	365.001	396.271	399.876	483.745	435.583	469.244	525.821	420.269	515.622	578.4	517.877	418.228	504.539	-0.269245	1.21507	0.0609444	1.24454
Mdh2	Malate dehydrogenase, mitochondrial OS=Mus musculus GN=Mdh2 PE=1 SV=3	8.82	36067.7	7467.86	P08249	16	61.24	0	MDHM_MOUSE	936.63	1054.35	921.787	1015.19	1319.16	1355.75	1606.22	1268.79	1614.42	1376.14	1331.96	1182.03	1100.48	1396.59	-0.35145	1.19296	0.0641264	1.24366
Eno2	Gamma-enolase OS=Mus musculus GN=Eno2 PE=1 SV=2	4.8	47638.9	4868.02	P17183	14	53.69	0	ENOG_MOUSE	300.579	305.565	202.303	261.791	315.35	313.77	338.524	398.935	420.478	342.715	382.237	289.191	283.226	362.013	-0.36002	1.18615	0.0651398	1.23959
Napa	Alpha-soluble NSF attachment protein OS=Mus musculus GN=Napa PE=1 SV=1	5.15	33645.9	534.328	Q9DB05	6	25.08	0	SNAA_MOUSE	65.4574	74.9583	77.6711	85.5406	106.272	111.168	90.4112	96.6777	153.668	117.795	122.144	119.489	86.8446	116.697	-0.430659	1.15879	0.069376	1.23623
Bphl	Valacyclovir hydrolase OS=Mus musculus GN=Bphl PE=1 SV=1	9.2	33079.1	495.58	Q8R164	7	29.21	0	BPHL_MOUSE	122.192	123.719	111.024	110.631	146.25	141.086	137.156	133.144	171.056	164.798	153.355	148.295	125.817	151.301	-0.268577	1.18337	0.0655593	1.21346
Gltp	Glycolipid transfer protein OS=Mus musculus GN=Gltp PE=1 SV=3	7.22	23860.7	843.048	Q9JL62	8	38.28	0	GLTP_MOUSE	152.421	130.496	127.465	118.837	159.278	147.733	163.18	143.882	215.337	173.399	164.017	167.879	139.372	171.282	-0.294603	1.17638	0.0666226	1.21271
Cntn2	Contactin-2 OS=Mus musculus GN=Cntn2 PE=1 SV=2	7.43	114016	472.119	Q61330	15	21.44	0	CNTN2_MOUSE	598.019	598.906	565.792	617.613	607.454	515.566	614.233	631.307	746.983	667.594	711.168	671.65	583.892	673.823	-0.206108	1.19296	0.0641264	1.21064
Sept5	Septin-5 OS=Mus musculus GN=Sept5 PE=1 SV=2	6.21	43204.3	622.18	Q9Z2Q6	4	18.7	0	SEPT5_MOUSE	87.6214	93.6166	79.2004	92.8871	94.4609	125.351	NA	107.231	160.672	108.246	121.064	120.713	95.5228	123.585	-0.370123	1.15164	0.070527	1.20966
Aco2	Aconitate hydratase, mitochondrial OS=Mus musculus GN=Aco2 PE=1 SV=1	7.83	86205	3044.62	Q99KI0	32	53.08	0	ACON_MOUSE	2388.25	2892.23	2907.14	3033.09	4302.11	4202.86	4152.14	3375.04	5933.47	5334.23	4133.12	3975.96	3287.61	4483.99	-0.454418	1.12063	0.0757484	1.20926
Rab8b	Ras-related protein Rab-8B OS=Mus musculus GN=Rab8b PE=1 SV=1	9.43	23774.2	2110.14	P61028	2	9.66	0	RAB8B_MOUSE	20.7116	31.3147	33.3104	15.265	15.8134	22.925	27.5862	34.2776	28.205	29.8284	35.1321	33.4563	23.2233	31.4142	-0.49456	1.10104	0.079242	1.20702
Slc25a5	ADP/ATP translocase 2 OS=Mus musculus GN=Slc25a5 PE=1 SV=3	10.03	33159.5	5286.26	P51881	18	59.4	0	ADT2_MOUSE	979.814	796.015	792.179	686.886	977.21	1023.86	1121.46	983.824	1759.1	1338.5	923.54	1032.72	875.995	1193.19	-0.424126	1.12063	0.0757484	1.1982
Atp2b2	Plasma membrane calcium-transporting ATPase 2 OS=Mus musculus GN=Atp2b2 PE=1 SV=2	5.59	133785	613.049	Q9R0K7	22	22.7	0	AT2B2_MOUSE	2757.11	7358.99	13784.6	7109.37	9040.74	22027.8	5149.98	5498.64	1883.52	5091.37	5603.24	7147.31	10346.4	5062.34	0.86438	0.802887	0.157439	1.17974
Gls	Glutaminase kidney isoform, mitochondrial OS=Mus musculus GN=Gls PE=1 SV=1	7.89	74819.3	162.024	D3Z7P3	2	3.71	0	GLSK_MOUSE	327.195	327.383	295.737	311.98	341.001	361.296	332.868	360.743	411.138	385.492	369.27	407.106	327.432	377.77	-0.205413	1.16169	0.0689141	1.17971
Tspan2	Tetraspanin-2 OS=Mus musculus GN=Tspan2 PE=1 SV=1	7.89	24808.9	10674.5	Q922J6	4	16.74	0	TSN2_MOUSE	1469.43	2156.82	2247.28	2306.35	2119.22	953.682	800.098	795.964	384.617	1925.64	1588.02	1641.3	1875.46	1189.27	0.792523	0.871266	0.134504	1.17779
Slc12a2	Solute carrier family 12 member 2 OS=Mus musculus GN=Slc12a2 PE=1 SV=2	6.95	131832	1231.12	P55012	28	29.54	0	S12A2_MOUSE	2219.43	1910.48	2071.96	2169.14	2044.28	2026.7	2269.62	2403.48	2357.82	2193.6	2440.19	2293.23	2073.66	2326.32	-0.166623	1.1627	0.0687547	1.17458
Rras2	Ras-related protein R-Ras2 OS=Mus musculus GN=Rras2 PE=1 SV=1	5.64	23627.7	922.85	P62071	5	28.92	0	RRAS2_MOUSE	146.89	130.56	136.642	117.21	133.65	134.114	131.6	157.333	145.617	171.19	162.209	164.721	133.178	155.445	-0.220795	1.15164	0.070527	1.17262
Camk2g	Calcium/calmodulin-dependent protein kinase type II subunit gamma OS=Mus musculus GN=Camk2g PE=1 SV=1	7.3	60291.3	420.29	Q923T9	7	14.74	0	KCC2G_MOUSE	140.428	126.461	140.923	135.399	152.979	129.935	130.358	144.877	183.149	209.875	167.323	197.523	137.688	172.184	-0.305456	1.12063	0.0757484	1.16151
Gdi2	Rab GDP dissociation inhibitor beta OS=Mus musculus GN=Gdi2 PE=1 SV=1	5.85	51050.5	1493.47	Q61598	21	65.17	0	GDIB_MOUSE	334.675	325.001	349.652	323.194	384.638	376.703	360.404	329.99	467.942	521.956	456.845	458.77	348.977	432.651	-0.295553	1.12063	0.0757484	1.15895
Dld	Dihydrolipoyl dehydrogenase, mitochondrial OS=Mus musculus GN=Dld PE=1 SV=2	7.81	54785.7	309.19	O08749	5	11.79	0	DLDH_MOUSE	365.54	258.416	246.273	288.613	349.058	330.578	349.962	337.796	552.475	453.325	362.995	341.099	306.413	399.609	-0.373727	1.08949	0.0813793	1.1518
Atp1a3	Sodium/potassium-transporting ATPase subunit alpha-3 OS=Mus musculus GN=Atp1a3 PE=1 SV=1	5.09	113117	18891.7	Q6PIC6	48	52.62	0	AT1A3_MOUSE	31644.1	30412.6	30888.5	33811.5	28405.1	22621	34276.6	38047.8	34172	30989.4	38222.9	36367.2	29630.5	35346	-0.261951	1.12063	0.0757484	1.15084
Map1a	Microtubule-associated protein 1A OS=Mus musculus GN=Map1a PE=1 SV=2	4.73	301509	158.016	Q9QYR6	6	2.92	0	MAP1A_MOUSE	1271.22	1207.59	1454.03	1305.85	1465.97	1544.79	1422.09	1420.44	1619.94	1794.44	1740.33	1725.53	1374.91	1620.46	-0.236258	1.12063	0.0757484	1.14526
Gapdh	Glyceraldehyde-3-phosphate dehydrogenase OS=Mus musculus GN=Gapdh PE=1 SV=2	8.35	36095.2	12811.5	P16858	14	63.96	0	G3P_MOUSE	2929.15	3867.81	4098.22	4163.97	5947.75	5069.78	4228.46	4877.75	5026.19	6971.3	8088.68	7550.1	4346.11	6123.75	-0.486736	1.02005	0.0954878	1.13023
Alb	Serum albumin OS=Mus musculus GN=Alb PE=1 SV=3	5.68	70745.6	947.176	P07724	6	13.98	0	ALBU_MOUSE	915.615	978.765	973.959	946.45	798.408	643.277	680.394	714.624	786.941	632.841	728.295	757.088	876.079	716.697	0.278004	1.08949	0.0813793	1.1244
Ndufb11	NADH dehydrogenase [ubiquinone] 1 beta subcomplex subunit 11, mitochondrial OS=Mus musculus GN=Ndufb11 PE=1 SV=2	4.92	17500.8	705.559	O09111	2	17.88	0	NDUBB_MOUSE	51.136	50.4622	58.881	56.4788	51.1378	65.3697	72.5731	80.0358	88.5084	64.8719	53.9435	59.0624	55.5776	69.8325	-0.314852	1.07908	0.0833528	1.12408
Cap1	Adenylyl cyclase-associated protein 1 OS=Mus musculus GN=Cap1 PE=1 SV=4	7.3	51907.1	344.327	P40124	5	17.51	0	CAP1_MOUSE	413.02	321.308	247.759	234.655	380.237	333.955	368.896	356.425	617.857	499.113	353.027	409.421	321.822	434.123	-0.430103	1.0165	0.096271	1.10375
Dsp	Desmoplakin OS=Mus musculus GN=Dsp PE=1 SV=1	6.38	335365	682.28	E9Q557	27	10.58	0	DESP_MOUSE	930.342	776.938	4888.31	1250.32	1244.05	15603.5	1222.93	1209.17	NA	1094.31	927.716	1090.16	4115.58	1108.86	0.92823	0.565241	0.272119	1.08679
Auh	Methylglutaconyl-CoA hydratase, mitochondrial OS=Mus musculus GN=Auh PE=1 SV=1	9.9	33680.2	362.703	Q9JLZ3	3	11.78	0	AUHM_MOUSE	110.61	92.9547	111.85	89.9678	100.614	107.539	114.994	105.615	154.805	119.804	112.456	123.755	102.256	121.905	-0.247588	1.05368	0.0883721	1.08238
Cltc	Clathrin heavy chain 1 OS=Mus musculus GN=Cltc PE=1 SV=3	5.35	193325	414.537	Q68FD5	34	26.09	0	CLH1_MOUSE	2736.58	2561.55	4870.17	2857.01	3310.67	6297.3	2296.83	2207.96	3009.2	2942.71	2192.71	2636.06	3772.21	2547.58	0.494958	0.955712	0.110736	1.07628
Cd82	CD82 antigen OS=Mus musculus GN=Cd82 PE=1 SV=1	4.76	30312.9	2577.14	P40237	5	19.55	0	CD82_MOUSE	1361.52	1078.51	1148.12	1094.34	1100.3	1112.49	1021.64	975.78	990.893	1123.38	997.625	942.521	1149.21	1008.64	0.185656	1.04788	0.0895614	1.0642
Gnai3	Guanine nucleotide-binding protein G(k) subunit alpha OS=Mus musculus GN=Gnai3 PE=1 SV=3	5.36	41108.5	3271.48	Q9DC51	6	17.8	0	GNAI3_MOUSE	48.3012	69.5984	75.4942	72.2273	45.72	40.8329	60.669	88.3131	58.492	121.78	94.4039	70.5521	58.6957	82.3684	-0.482165	0.946936	0.112996	1.06262
Ehd1	EH domain-containing protein 1 OS=Mus musculus GN=Ehd1 PE=1 SV=1	6.36	60659.9	472.625	Q9WVK4	10	28.84	0	EHD1_MOUSE	423.512	386.894	363.389	382.626	320.793	328.287	304.004	330.037	183.88	292.028	347.661	311.586	367.583	294.866	0.339914	0.984503	0.103633	1.04153
Pex5l	PEX5-related protein OS=Mus musculus GN=Pex5l PE=1 SV=2	5.03	63420	248.037	Q8C437	4	11.46	0	PEX5R_MOUSE	151.419	146.863	219.1	184.84	210.203	186.308	257.739	239.726	262.967	195.07	180.225	221.118	183.122	226.141	-0.30674	0.984503	0.103633	1.03118
Rhob	Rho-related GTP-binding protein RhoB OS=Mus musculus GN=Rhob PE=1 SV=1	4.91	22579.6	5627.07	P62746	8	53.57	0	RHOB_MOUSE	214.551	403.535	421.462	390.236	398.831	368.592	518.258	392.894	347.052	503.748	563.542	548.032	366.201	478.921	-0.398813	0.946936	0.112996	1.02749
Pebp1	Phosphatidylethanolamine-binding protein 1 OS=Mus musculus GN=Pebp1 PE=1 SV=3	5.03	21001.6	840.066	P70296	3	26.74	0	PEBP1_MOUSE	75.8277	123.696	103.384	87.5399	NA	124.129	119.293	NA	120.503	166.672	155.163	112.142	102.915	134.754	-0.396845	0.946936	0.112996	1.02673
Amph	Amphiphysin OS=Mus musculus GN=Amph PE=1 SV=1	4.36	75127.3	182.641	Q7TQF7	3	4.66	0	AMPH_MOUSE	103.566	102.507	104.325	124.561	143.015	70.8669	93.266	145.473	172.924	126.224	156.729	155.848	108.14	141.744	-0.395193	0.927666	0.118123	1.00834
Hspd1	60 kDa heat shock protein, mitochondrial OS=Mus musculus GN=Hspd1 PE=1 SV=1	5.8	61126.7	496.123	P63038	12	30.89	0	CH60_MOUSE	330.74	358.118	284.717	345.356	469.476	498.401	453.217	508.662	537.21	464.14	480.76	375.365	381.135	469.892	-0.321411	0.946936	0.112996	0.999997
Ndufb9	NADH dehydrogenase [ubiquinone] 1 beta subcomplex subunit 9 OS=Mus musculus GN=Ndufb9 PE=1 SV=3	7.75	22269.3	438.409	Q9CQJ8	3	16.76	0	NDUB9_MOUSE	48.5757	47.7103	60.0266	50.5728	44.941	148.722	122.406	73.9499	NA	89.5102	89.2847	77.391	66.7581	90.5083	-0.56771	0.818715	0.151805	0.996287
Gpr37	Prosaposin receptor GPR37 OS=Mus musculus GN=Gpr37 PE=2 SV=1	8	68372.1	173.351	Q9QY42	2	3.67	0	GPR37_MOUSE	487.84	380.674	483.332	431.955	382.822	405.499	656.346	364.321	588.11	583.368	490.275	522.608	428.687	534.171	-0.300708	0.946936	0.112996	0.993536
Atp4a	Potassium-transporting ATPase alpha chain 1 OS=Mus musculus GN=Atp4a PE=1 SV=3	5.51	115727	942.606	Q64436	6	6.2	0	ATP4A_MOUSE	2236.34	2341.54	2544.43	2551.48	2187.81	1830.87	2150.22	2146.24	1315.26	1860.06	1907.81	1942.99	2282.08	1887.1	0.283683	0.946936	0.112996	0.988516
Golga7	Golgin subfamily A member 7 OS=Mus musculus GN=Golga7 PE=1 SV=1	6.89	16020.1	525.568	Q91W53	2	18.98	0	GOGA7_MOUSE	44.3897	45.5829	47.7696	44.9473	45.6972	NA	55.9723	41.8755	73.764	50.9547	56.4263	56.2705	45.6773	55.8772	-0.27092	0.946936	0.112996	0.984929
Ywhae	14-3-3 protein epsilon OS=Mus musculus GN=Ywhae PE=1 SV=1	4.44	29345	4343.17	P62259	12	47.06	0	1433E_MOUSE	393.338	386.973	392.304	423.164	422.968	419.054	512.401	373.144	587.597	471.995	462.616	456.19	406.3	477.324	-0.220195	0.946936	0.112996	0.972201
Hspa8	Heat shock cognate 71 kDa protein OS=Mus musculus GN=Hspa8 PE=1 SV=1	5.2	71099.3	6022.51	P63017	29	57.89	0	HSP7C_MOUSE	2044.78	1898.04	1966.71	2316.81	2430.16	2430.5	2278.44	2340.55	3129.52	2377.26	2596.16	2522.8	2181.17	2540.79	-0.219142	0.946936	0.112996	0.971963
Sfxn3	Sideroflexin-3 OS=Mus musculus GN=Sfxn3 PE=1 SV=1	9.78	35691.4	687.638	Q91V61	9	33.96	0	SFXN3_MOUSE	215.666	219.712	207.359	197.078	205.254	248.865	234.097	232.004	253.77	263.61	238.73	228.228	215.656	241.74	-0.166826	0.955712	0.110736	0.970163
Tubb4b	Tubulin beta-4B chain OS=Mus musculus GN=Tubb4b PE=1 SV=1	4.6	50287.4	16285.1	P68372	22	64.94	0	TBB4B_MOUSE	1769.37	1544.84	1600.6	1740.86	1768.9	1618.18	1582.22	1976.39	2139.16	1773.55	2155.53	1893.42	1673.79	1920.04	-0.191866	0.946936	0.112996	0.966178
Vdac1	Voltage-dependent anion-selective channel protein 1 OS=Mus musculus GN=Vdac1 PE=1 SV=3	8.67	32522.6	6119.52	Q60932	13	60.47	0	VDAC1_MOUSE	1190.26	1461.8	1426.35	1483.84	1356.54	1601.94	1596.31	1506	1793.02	1665.06	1537.88	1551.91	1420.12	1608.36	-0.182997	0.946936	0.112996	0.964456
Lgi3	Leucine-rich repeat LGI family member 3 OS=Mus musculus GN=Lgi3 PE=1 SV=1	8.09	62559.1	1553.03	Q8K406	16	33.76	0	LGI3_MOUSE	757.25	704.619	789.14	757.991	752.518	775.462	632.552	702.297	567.545	623.554	732.416	764.507	756.163	670.479	0.180192	0.946936	0.112996	0.963928
Cntnap2	Contactin-associated protein-like 2 OS=Mus musculus GN=Cntnap2 PE=1 SV=2	6.31	150193	234.484	Q9CPW0	7	7.36	0	CNTP2_MOUSE	744.757	651.255	724.897	669.317	703.597	724.725	798.356	741.966	815.512	719.787	746.294	881.523	703.091	783.906	-0.155127	0.946936	0.112996	0.959558
Anxa2	Annexin A2 OS=Mus musculus GN=Anxa2 PE=1 SV=2	7.69	38961.4	1200.12	P07356	9	29.2	0	ANXA2_MOUSE	207.73	202.052	330.296	227.109	229.95	491.565	217.3	210.366	211.683	116.159	206.163	222.05	281.45	197.287	0.465005	0.829943	0.14793	0.951334
Arf6	ADP-ribosylation factor 6 OS=Mus musculus GN=Arf6 PE=1 SV=2	9.29	20196.3	4195.04	P62331	8	53.71	0	ARF6_MOUSE	280.79	332.518	301.522	244.869	351.179	215.66	294.237	360.105	291.886	346.106	400.59	387.663	287.757	346.764	-0.278462	0.891786	0.128296	0.93425
Snap25	Synaptosomal-associated protein 25 OS=Mus musculus GN=Snap25 PE=1 SV=1	4.46	23543.3	3660.14	P60879	14	65.53	0	SNP25_MOUSE	401.749	196.818	415.862	246.695	85.9459	109.311	384.249	119.161	771.133	497.568	194.014	440.394	242.73	401.086	-0.716641	0.59491	0.25415	0.931393
Rhog	Rho-related GTP-binding protein RhoG OS=Mus musculus GN=Rhog PE=1 SV=1	8.08	21764.7	8157.06	P84096	11	68.06	0	RHOG_MOUSE	354.349	452.621	513.475	500.332	456.908	401.183	504.822	519.509	412.839	597.417	584.727	555.56	446.478	529.146	-0.246021	0.897338	0.126666	0.930453
Phgdh	D-3-phosphoglycerate dehydrogenase OS=Mus musculus GN=Phgdh PE=1 SV=3	6.1	57384	653.206	Q61753	9	21.76	0	SERA_MOUSE	396.95	423.614	455.202	420.038	561.192	544.51	492.05	497.226	597.792	581.798	586.35	495.832	466.917	541.841	-0.22205	0.894125	0.127607	0.921285
Cadm3	Cell adhesion molecule 3 OS=Mus musculus GN=Cadm3 PE=1 SV=1	5.4	43363.6	569.212	Q99N28	5	22.22	0	CADM3_MOUSE	197.323	240.376	257.593	241.571	213.009	210.922	235.959	287.156	219.658	263.687	273.398	281.267	226.799	260.188	-0.197729	0.897338	0.126666	0.918865
Ndufa6	NADH dehydrogenase [ubiquinone] 1 alpha subcomplex subunit 6 OS=Mus musculus GN=Ndufa6 PE=1 SV=1	10.52	15282.8	526.611	Q9CQZ5	4	37.4	0	NDUA6_MOUSE	93.2076	78.1671	86.0967	76.3397	66.8524	75.8449	74.8028	96.3043	178.608	94.2863	89.9647	98.7076	79.4181	105.446	-0.358259	0.845286	0.142795	0.918073
Gnaq	Guanine nucleotide-binding protein G(q) subunit alpha OS=Mus musculus GN=Gnaq PE=1 SV=4	5.34	42443.3	1898.12	P21279	14	47.35	0	GNAQ_MOUSE	596.826	594.445	568.29	536.097	546.425	445.68	636.993	561.549	675.894	617.008	578.545	647.26	547.961	619.542	-0.180924	0.897338	0.126666	0.915396
Immt	MICOS complex subunit Mic60 OS=Mus musculus GN=Immt PE=1 SV=1	6.16	84299.4	536.963	Q8CAQ8	21	33.42	0	MIC60_MOUSE	461.369	405.817	442.765	474.143	454.681	511.166	554.009	521.614	594.3	519.83	484.613	444.401	458.324	519.794	-0.178925	0.897338	0.126666	0.915003
Thy1	Thy-1 membrane glycoprotein OS=Mus musculus GN=Thy1 PE=1 SV=1	9.27	18308.1	3066.02	P01831	4	26.54	0	THY1_MOUSE	1003.3	842.645	1008.79	887.172	855.212	1031.66	1043.17	974.209	1081.31	996.087	1099.56	1065.99	938.13	1043.39	-0.15709	0.897338	0.126666	0.910985
Rdx	Radixin OS=Mus musculus GN=Rdx PE=1 SV=3	5.83	68657	769.219	P26043	17	31.56	0	RADI_MOUSE	787.064	9775.76	665.404	11050.4	8917.05	6460.26	7411.57	6548.47	640.822	7861.94	640.219	700.496	6276	3967.25	0.815558	0.400906	0.397278	0.908769
Jup	Junction plakoglobin OS=Mus musculus GN=Jup PE=1 SV=3	5.69	82542.3	2253.95	Q02257	22	36.64	0	PLAK_MOUSE	597.749	519.806	1349.81	545.928	580.083	3149.08	449.459	431.191	1133.31	414.877	535.697	550.584	1123.74	585.853	0.659995	0.621919	0.238826	0.90685
Slc25a4	ADP/ATP translocase 1 OS=Mus musculus GN=Slc25a4 PE=1 SV=4	10.02	33132.4	6854.24	P48962	18	59.73	0	ADT1_MOUSE	1652.64	1621.23	1629.01	1447.65	1767.9	1822.34	1885.17	1585.76	3232.38	2263.21	1722.22	1929.5	1656.79	2103.04	-0.305991	0.845286	0.142795	0.898965
Napb	Beta-soluble NSF attachment protein OS=Mus musculus GN=Napb PE=1 SV=2	5.17	33899.2	567.923	P28663	7	29.19	0	SNAB_MOUSE	79.9556	78.0377	121.022	135.464	135.715	121.038	127.121	120.405	118.676	144.904	159.789	152.539	111.872	137.239	-0.322138	0.838998	0.144878	0.898716
Atp5d	ATP synthase subunit delta, mitochondrial OS=Mus musculus GN=Atp5d PE=1 SV=1	4.79	17600.1	1844.34	Q9D3D9	2	13.69	0	ATPD_MOUSE	261.146	171.266	199.183	109.107	NA	87.3074	312.951	NA	215.43	250.031	126.735	272.504	165.602	235.53	-0.55565	0.692859	0.202834	0.888144
Phb	Prohibitin OS=Mus musculus GN=Phb PE=1 SV=1	5.43	29877.1	1110.32	P67778	7	29.78	0	PHB_MOUSE	166.736	134.261	172.084	163.249	162.39	167.596	181.387	189.577	191.515	170.493	165.444	176.598	161.053	179.169	-0.15643	0.871266	0.134504	0.885197
Sept8	Septin-8 OS=Mus musculus GN=Sept8 PE=1 SV=4	5.6	50154.6	4410.59	Q8CHH9	18	57.11	0	SEPT8_MOUSE	1517.99	1757.29	2349.67	1816.33	1760.46	1861.24	1941.45	1777.52	2936.68	2384.75	1922.1	2472.22	1843.83	2239.12	-0.270383	0.829943	0.14793	0.872876
Sypl1	Synaptophysin-like protein 1 OS=Mus musculus GN=Sypl1 PE=1 SV=2	8.94	29241.6	1113.88	O09117	2	13.03	0	SYPL1_MOUSE	314.268	402.117	441.051	403.483	421.008	361.088	367.058	330.029	256.633	404.795	312.63	331.691	390.502	333.806	0.231578	0.829943	0.14793	0.861646
Ndufs2	NADH dehydrogenase [ubiquinone] iron-sulfur protein 2, mitochondrial OS=Mus musculus GN=Ndufs2 PE=1 SV=1	6.54	53025	511.239	Q91WD5	9	22.89	0	NDUS2_MOUSE	253.229	229.897	249.577	248.22	268.177	273.811	280.147	303.51	321.514	299.267	266.787	240.604	253.818	285.305	-0.164616	0.845286	0.142795	0.861166
Vim	Vimentin OS=Mus musculus GN=Vim PE=1 SV=3	4.86	53744.8	890.318	P20152	4	6.65	0	VIME_MOUSE	31.8538	23.9952	57.2537	35.6802	77.2197	68.2592	41.8088	46.6637	77.4701	57.4691	91.4868	86.5049	49.0436	66.9006	-0.510364	0.69144	0.203498	0.859395
Cst3	Cystatin-C OS=Mus musculus GN=Cst3 PE=1 SV=2	9.29	15759	1285.45	P21460	2	20	0	CYTC_MOUSE	159.358	134.969	115.452	96.8195	NA	108.665	105.73	NA	114.283	98.9359	87.2776	97.9845	123.053	100.842	0.270718	0.814303	0.153355	0.858125
Slc25a22	Mitochondrial glutamate carrier 1 OS=Mus musculus GN=Slc25a22 PE=1 SV=1	9.31	35126.7	700.264	Q9D6M3	6	27.24	0	GHC1_MOUSE	214.365	194.7	211.28	210.946	264.068	213.359	244.486	257.263	325.69	267.28	211.452	223.858	218.12	255.005	-0.217703	0.829943	0.14793	0.858021
Aldh5a1	Succinate-semialdehyde dehydrogenase, mitochondrial OS=Mus musculus GN=Aldh5a1 PE=1 SV=1	8.25	56538.6	1132.23	Q8BWF0	13	37.48	0	SSDH_MOUSE	734.85	742.483	945.914	833.166	623.599	587.537	568.462	515.107	747.992	599.167	621.709	687.117	744.591	623.259	0.248451	0.818715	0.151805	0.855583
Camk2a	Calcium/calmodulin-dependent protein kinase type II subunit alpha OS=Mus musculus GN=Camk2a PE=1 SV=2	6.63	54685.1	1870.7	P11798	15	37.24	0	KCC2A_MOUSE	1013.22	889.57	884.567	890.583	920.174	909.387	933.936	834.799	1183.3	1276.3	1069.05	1059.53	917.917	1059.48	-0.194415	0.818715	0.151805	0.841482
Sptbn1	Spectrin beta chain, non-erythrocytic 1 OS=Mus musculus GN=Sptbn1 PE=1 SV=2	5.26	275079	625.288	Q62261	61	36.86	0	SPTB2_MOUSE	2748.74	2781.8	2832.44	2904.25	2473.52	2480.76	3194.25	3192.53	3254.65	2602.96	2903.52	2862.1	2703.58	3001.67	-0.149228	0.818715	0.151805	0.832204
Ca14	Carbonic anhydrase 14 OS=Mus musculus GN=Ca14 PE=1 SV=1	5.89	37733.5	456.327	Q9WVT6	5	17.51	0	CAH14_MOUSE	315.339	312.001	345.561	290.511	284.481	313.924	342.942	304.676	349.477	352.957	339.764	348.242	310.303	339.676	-0.131635	0.818715	0.151805	0.82923
Calm1	Calmodulin OS=Mus musculus GN=Calm1 PE=1 SV=2	3.88	16837.7	1926.12	P62204	6	51.68	0	CALM_MOUSE	322.2	126.541	270.437	83.3047	NA	169.559	387.404	NA	324.909	337.834	85.2098	376.011	194.408	302.274	-0.62579	0.538655	0.289298	0.825688
Acat1	Acetyl-CoA acetyltransferase, mitochondrial OS=Mus musculus GN=Acat1 PE=1 SV=1	8.65	45158.4	433.336	Q8QZT1	6	20.05	0	THIL_MOUSE	155.836	188.736	143.682	177.645	208.148	223.7	217.632	245.374	286.687	170.713	245.649	174.853	182.958	223.485	-0.280537	0.773357	0.168517	0.822668
Cd81	CD81 antigen OS=Mus musculus GN=Cd81 PE=1 SV=2	5.44	26498.9	6806.02	P35762	4	30.93	0	CD81_MOUSE	3092.39	5337.26	5950.47	5010.32	4832.72	3442.8	2592.36	3352.45	2586.25	3701.09	4833.39	4477.21	4610.99	3590.46	0.364203	0.731432	0.185596	0.81709
Clec2l	C-type lectin domain family 2 member L OS=Mus musculus GN=Clec2l PE=1 SV=1	6.96	24109.4	308.647	P0C7M9	2	10.9	0	CLC2L_MOUSE	45.2669	88.971	123.64	90.6057	98.5282	131.752	103.757	111.535	NA	119.115	131.07	141.315	96.4607	121.358	-0.399095	0.692859	0.202834	0.799582
Pgam1	Phosphoglycerate mutase 1 OS=Mus musculus GN=Pgam1 PE=1 SV=3	6.79	28946.1	733.736	Q9DBJ1	4	21.26	0	PGAM1_MOUSE	86.4274	86.3038	83.2979	86.138	125.888	112.345	96.5027	90.9136	163.088	136.995	113.524	111.251	96.7334	118.712	-0.284931	0.744202	0.180218	0.796883
Ehd3	EH domain-containing protein 3 OS=Mus musculus GN=Ehd3 PE=1 SV=2	6	60878.2	827.946	Q9QXY6	16	44.49	0	EHD3_MOUSE	623.613	595.372	531.431	549.949	457.493	447.759	528.614	466.913	322.658	343.055	550.216	482.687	534.27	449.024	0.2692	0.744202	0.180218	0.791394
Pacsin1	Protein kinase C and casein kinase substrate in neurons protein 1 OS=Mus musculus GN=Pacsin1 PE=1 SV=1	4.97	50917.5	1171.83	Q61644	11	33.56	0	PACN1_MOUSE	326.278	251.231	421.574	450.385	401.044	360.612	377.219	351.958	447.521	371.828	632.758	622.13	368.521	467.236	-0.325	0.712145	0.194024	0.7828
Ndufs5	NADH dehydrogenase [ubiquinone] iron-sulfur protein 5 OS=Mus musculus GN=Ndufs5 PE=1 SV=3	9.25	12875.8	479.062	Q99LY9	2	23.58	0	NDUS5_MOUSE	NA	22.4569	26.7023	32.683	NA	33.6613	41.5879	NA	NA	44.7742	28.1401	32.3401	28.8759	36.7106	-0.340259	0.702325	0.198461	0.780408
Sfxn5	Sideroflexin-5 OS=Mus musculus GN=Sfxn5 PE=1 SV=2	9.76	37499.7	258.101	Q925N0	2	5.56	0	SFXN5_MOUSE	407.922	378.226	386.668	389.176	423.128	363.733	423.695	455.747	893.336	420.099	452.664	385.496	391.475	505.173	-0.303886	0.716803	0.191954	0.778559
Aldoa	Fructose-bisphosphate aldolase A OS=Mus musculus GN=Aldoa PE=1 SV=2	8.07	39812.2	4000.92	P05064	22	83.79	0	ALDOA_MOUSE	924.223	936.766	1092.25	1015.18	1260.27	1290.32	1205.33	1141.4	1326.05	1281.48	1265.61	1117.43	1086.5	1222.88	-0.180436	0.756466	0.1752	0.777687
Rab2a	Ras-related protein Rab-2A OS=Mus musculus GN=Rab2a PE=1 SV=1	6.08	23718.6	1431.95	P53994	8	49.06	0	RAB2A_MOUSE	145.285	140.463	153.487	140.636	130.029	135.707	144.05	162.489	136.928	167.045	152.504	164.843	140.935	154.643	-0.132	0.756466	0.1752	0.767896
Fkbp1a	Peptidyl-prolyl cis-trans isomerase FKBP1A OS=Mus musculus GN=Fkbp1a PE=1 SV=2	8.66	11979.7	2313.99	P26883	2	25	0	FKB1A_MOUSE	74.0934	67.7078	137.648	48.333	NA	41.6782	119.048	NA	49.6123	110.034	76.5541	160.99	73.892	103.248	-0.505109	0.565241	0.272119	0.758045
Ndufa8	NADH dehydrogenase [ubiquinone] 1 alpha subcomplex subunit 8 OS=Mus musculus GN=Ndufa8 PE=1 SV=3	8.48	20448.3	562.059	Q9DCJ5	4	29.65	0	NDUA8_MOUSE	89.5948	107.531	127.097	112.051	97.5374	153.861	139.555	107.612	144.587	140.535	131.976	130.171	114.612	132.406	-0.22471	0.717746	0.191538	0.7521
Ywhah	14-3-3 protein eta OS=Mus musculus GN=Ywhah PE=1 SV=2	4.61	28382.9	960.85	P68510	4	17.07	0	1433F_MOUSE	49.4552	56.1178	53.9254	60.5909	61.3553	54.3931	69.3094	48.5663	75.2298	66.1389	62.6406	61.6267	55.973	63.9186	-0.182534	0.727752	0.187175	0.750294
Atp5a1	ATP synthase subunit alpha, mitochondrial OS=Mus musculus GN=Atp5a1 PE=1 SV=1	9.52	59866.8	9964.54	Q03265	27	57.69	0	ATPA_MOUSE	5026.27	4060.29	4218.22	4805.89	4417.48	5169.86	5473.92	5104.99	5158.42	5018.83	5349.42	4470.94	4616.34	5096.09	-0.145477	0.735806	0.183736	0.750049
Pkm	Pyruvate kinase PKM OS=Mus musculus GN=Pkm PE=1 SV=4	7.21	58415.3	7414.7	P52480	26	62.9	0	KPYM_MOUSE	1625.22	1591.77	1831.32	1783.4	2148.24	2250.79	2044.15	1717.46	2585.77	2417.31	2084.16	2117.51	1871.79	2161.06	-0.207539	0.717735	0.191543	0.747138
Uqcrfs1	Cytochrome b-c1 complex subunit Rieske, mitochondrial OS=Mus musculus GN=Uqcrfs1 PE=1 SV=1	8.91	29652.8	1045.51	Q9CR68	6	20.8	0	UCRI_MOUSE	671.745	585.874	616.11	488.561	479.686	520.58	1010.55	483.839	703.232	646.123	615.791	621.777	560.426	680.219	-0.253967	0.68882	0.204729	0.734148
Atp1b1	Sodium/potassium-transporting ATPase subunit beta-1 OS=Mus musculus GN=Atp1b1 PE=1 SV=1	8.78	35593.8	8416.97	P14094	15	48.03	0	AT1B1_MOUSE	6817.63	7028.61	7757.58	8095.18	5819.47	5911.35	7414.91	8602.57	5783.38	8212.46	9226.93	9209.41	6904.97	8074.94	-0.219055	0.696073	0.201338	0.729728
Coro1c	Coronin-1C OS=Mus musculus GN=Coro1c PE=1 SV=2	6.67	53805.3	976.819	Q9WUM4	12	28.27	0	COR1C_MOUSE	537.507	494.032	426.696	430.295	635.882	592.597	429.843	371.412	388.063	489.057	499.789	509.667	519.502	447.972	0.20854	0.696073	0.201338	0.726641
Ndufa7	NADH dehydrogenase [ubiquinone] 1 alpha subcomplex subunit 7 OS=Mus musculus GN=Ndufa7 PE=1 SV=3	10.56	12632.6	878.968	Q9Z1P6	3	28.32	0	NDUA7_MOUSE	52.064	34.7541	38.8469	35.5198	41.0254	37.4243	50.0258	34.0474	55.8957	47.8373	45.3455	44.7061	39.9391	46.3096	-0.211356	0.69144	0.203498	0.723022
Dpysl2	Dihydropyrimidinase-related protein 2 OS=Mus musculus GN=Dpysl2 PE=1 SV=2	5.92	62676.9	18719.7	O08553	29	80.07	0	DPYL2_MOUSE	7093.2	8118.62	6750.06	9213.36	7516.79	6482.96	7768.07	8759.93	7533.16	7482.04	10741	9453.66	7529.17	8622.98	-0.193004	0.696073	0.201338	0.722336
Atp5f1	ATP synthase F(0) complex subunit B1, mitochondrial OS=Mus musculus GN=Atp5f1 PE=1 SV=1	9.39	29062.9	938.616	Q9CQQ7	9	33.2	0	AT5F1_MOUSE	465.933	394.759	455.617	419.684	434.595	408.813	471.015	472.596	505.525	491.672	431.37	431.426	429.9	467.267	-0.120094	0.712145	0.194024	0.7222
Gstm5	Glutathione S-transferase Mu 5 OS=Mus musculus GN=Gstm5 PE=1 SV=1	7	27034.2	878.675	P48774	5	23.66	0	GSTM5_MOUSE	68.9465	62.5015	87.2817	67.7671	69.8774	84.7084	76.4892	62.8277	105.145	82.5533	91.2925	96.3039	73.5138	85.7686	-0.21357	0.68882	0.204729	0.721169
Cox6b1	Cytochrome c oxidase subunit 6B1 OS=Mus musculus GN=Cox6b1 PE=1 SV=2	8.97	10299.6	2774.93	P56391	5	61.63	0	CX6B1_MOUSE	52.151	62.5735	162.765	33.4449	NA	NA	124.68	NA	NA	128.63	37.7371	140.444	77.7337	107.873	-0.564617	0.448395	0.356127	0.721006
Camk2b	Calcium/calmodulin-dependent protein kinase type II subunit beta OS=Mus musculus GN=Camk2b PE=1 SV=2	6.89	61202.3	850.928	P28652	13	34.5	0	KCC2B_MOUSE	411.29	334.25	373.639	363.875	387.864	368.118	341.756	350.215	522.141	470.657	431.833	448.202	373.173	427.467	-0.182176	0.696073	0.201338	0.719518
Ywhab	14-3-3 protein beta/alpha OS=Mus musculus GN=Ywhab PE=1 SV=3	4.57	28200.5	1328.11	Q9CQV8	7	29.67	0	1433B_MOUSE	144.203	131.139	124.17	123.659	146.103	179.212	160.49	134.239	206.602	177.395	156.083	141.995	141.414	162.801	-0.200454	0.690653	0.203867	0.719155
Tubb2a	Tubulin beta-2A chain OS=Mus musculus GN=Tubb2a PE=1 SV=1	4.59	50306.3	12994.3	Q7TMM9	20	58.88	0	TBB2A_MOUSE	1001.49	646.689	809.48	848.552	864.753	745.17	837.893	861.881	910.26	996.651	874.999	1025.22	819.356	917.817	-0.172626	0.696073	0.201338	0.717159
Mif	Macrophage migration inhibitory factor OS=Mus musculus GN=Mif PE=1 SV=2	7.16	12675.4	4544.35	P34884	4	41.74	0	MIF_MOUSE	99.9579	284.505	418.759	198.282	NA	149.336	514.373	NA	137.966	303.683	234.337	403.771	230.168	318.826	-0.506344	0.506859	0.311273	0.716442
Cs	Citrate synthase, mitochondrial OS=Mus musculus GN=Cs PE=1 SV=1	8.72	52021.9	1071.92	Q9CZU6	10	26.08	0	CISY_MOUSE	682.286	638.654	569.641	550.241	713.761	628.717	637.153	628.324	786.749	712.389	711.713	702.206	630.55	696.422	-0.145254	0.69908	0.199949	0.714011
Kcna2	Potassium voltage-gated channel subfamily A member 2 OS=Mus musculus GN=Kcna2 PE=1 SV=1	4.58	57157.1	805.746	P63141	11	26.65	0	KCNA2_MOUSE	331.836	284.978	330.693	310.533	345.55	334.297	331.406	395.223	432.583	324.425	367.903	314.458	322.981	361	-0.15379	0.696073	0.201338	0.71286
Serpinb1a	Leukocyte elastase inhibitor A OS=Mus musculus GN=Serpinb1a PE=1 SV=1	5.8	42746.1	506.865	Q9D154	7	24.01	0	ILEUA_MOUSE	170.26	179.384	179.086	159.584	215.043	217.885	186.148	196.7	229.062	205.992	212.54	208.915	186.874	206.56	-0.151246	0.69144	0.203498	0.707788
Rhoa	Transforming protein RhoA OS=Mus musculus GN=Rhoa PE=1 SV=1	5.73	22124.4	6345.14	Q9QUI0	6	36.79	0	RHOA_MOUSE	383.133	446.275	462.36	448.293	443.841	383.535	474.447	506.473	354.526	529.87	539.501	505.788	427.906	485.101	-0.171631	0.68077	0.208559	0.702072
Slc25a3	Phosphate carrier protein, mitochondrial OS=Mus musculus GN=Slc25a3 PE=1 SV=1	9.49	40088.6	2845.84	Q8VEM8	14	37.82	0	MPCP_MOUSE	1162.57	1244.9	1377.92	1181	1107.22	1288.09	1456.93	1344.24	1254.78	1371.41	1230.68	1332.61	1226.95	1331.77	-0.119749	0.69144	0.203498	0.701733
Eef1a1	Elongation factor 1-alpha 1 OS=Mus musculus GN=Eef1a1 PE=1 SV=3	9.34	50456.1	7491.53	P10126	17	53.9	0	EF1A1_MOUSE	2218.17	1992.8	2321.24	2014.89	2495.81	3067.97	2411.11	1713.32	1831.53	1924.03	2213.52	2211.17	2351.81	2050.78	0.191956	0.671623	0.212999	0.698516
Lap3	Cytosol aminopeptidase OS=Mus musculus GN=Lap3 PE=1 SV=3	7.63	56540.6	439.093	Q9CPY7	11	27.36	0	AMPL_MOUSE	333.598	314.524	350.814	295.74	328.222	360.41	262.966	263.015	350.678	302.716	289.204	332.767	330.551	300.224	0.144316	0.683256	0.207369	0.698331
Enpp6	Ectonucleotide pyrophosphatase/phosphodiesterase family member 6 OS=Mus musculus GN=Enpp6 PE=1 SV=1	6.95	50960.7	2155.49	Q8BGN3	16	48.86	0	ENPP6_MOUSE	791.969	722.466	870.609	753.007	706.555	583.209	834.293	761.504	868.89	867.814	741.279	813.925	737.969	814.617	-0.1505	0.676954	0.2104	0.693482
Pdhb	Pyruvate dehydrogenase E1 component subunit beta, mitochondrial OS=Mus musculus GN=Pdhb PE=1 SV=1	6.44	39279.4	1639.24	Q9D051	10	37.05	0	ODPB_MOUSE	385.973	411.314	324.767	457.308	464.066	495.505	481.829	441.619	493.462	457.734	501.781	436.464	423.155	468.815	-0.159525	0.671623	0.212999	0.690309
Stx1a	Syntaxin-1A OS=Mus musculus GN=Stx1a PE=1 SV=3	4.96	33225.6	450.71	O35526	5	18.06	0	STX1A_MOUSE	177.652	151.028	154.253	144.836	130.551	160.887	158.793	166.367	186.998	186.796	160.349	151.768	153.201	168.512	-0.13914	0.671749	0.212937	0.686008
Cnrip1	CB1 cannabinoid receptor-interacting protein 1 OS=Mus musculus GN=Cnrip1 PE=1 SV=1	8.19	18726.4	2350.89	Q5M8N0	5	48.17	0	CNRP1_MOUSE	225.053	215.491	233.848	235.175	87.6373	156.294	181.43	136.955	104.33	85.2442	188.581	182.176	192.25	146.453	0.377772	0.568652	0.26999	0.682698
Rtn4	Reticulon-4 OS=Mus musculus GN=Rtn4 PE=1 SV=2	4.27	127127	649.888	Q99P72	22	35.46	0	RTN4_MOUSE	2065.54	2085.8	2151.36	1868.74	1799.14	1659.81	1913.56	1862.5	2104.45	2171.99	2347.85	2522.79	1938.4	2153.86	-0.149926	0.658752	0.219406	0.675597
Ap2a2	AP-2 complex subunit alpha-2 OS=Mus musculus GN=Ap2a2 PE=1 SV=2	6.5	104929	188.439	P17427	5	7.46	0	AP2A2_MOUSE	208.087	261.948	313.965	262.05	248.91	223.506	162.571	176.274	293.039	229.942	217.815	237.626	253.078	219.544	0.219967	0.621919	0.238826	0.659673
Plp1	Myelin proteolipid protein OS=Mus musculus GN=Plp1 PE=1 SV=2	8.29	30875.6	13335.8	P60202	9	28.52	0	MYPR_MOUSE	74295.9	96490.4	71530.1	87124.7	61113.8	42578.1	74369.5	87896.8	78666.6	92365.3	75390.5	90714.2	72188.8	83233.8	-0.247071	0.606182	0.247639	0.654599
Glul	Glutamine synthetase OS=Mus musculus GN=Glul PE=1 SV=6	6.66	42861.1	11933.3	P15105	16	73.19	0	GLNA_MOUSE	3838.04	4246.24	4390.97	5636.5	5488.21	4487.86	4792.69	6617.19	4088.41	5718.97	6403.5	4870.78	4681.3	5415.26	-0.203184	0.616045	0.242078	0.648687
Atp1b2	Sodium/potassium-transporting ATPase subunit beta-2 OS=Mus musculus GN=Atp1b2 PE=1 SV=2	8.34	33743.4	350.91	P14231	3	15.86	0	AT1B2_MOUSE	78.5366	102.93	269.341	201.528	125.83	130.79	184.214	177.865	276.061	195.644	142.416	127.63	151.493	183.972	-0.359204	0.537874	0.289818	0.646789
Rab5a	Ras-related protein Rab-5A OS=Mus musculus GN=Rab5a PE=1 SV=1	8.25	23826.8	1404.14	Q9CQD1	8	53.49	0	RAB5A_MOUSE	104.694	97.477	106.053	94.7798	80.9688	82.7219	89.6722	70.8557	76.6304	91.6423	81.3093	99.6526	94.4492	84.9604	0.154384	0.621077	0.239289	0.639978
Hspa5	78 kDa glucose-regulated protein OS=Mus musculus GN=Hspa5 PE=1 SV=3	4.87	72536.2	786.658	P20029	4	6.11	0	GRP78_MOUSE	124.305	111.449	130.421	153.821	120.689	167.827	120.485	157.89	160.307	140.536	171.221	157.296	134.752	151.289	-0.172656	0.614028	0.243205	0.63784
Mpc2	Mitochondrial pyruvate carrier 2 OS=Mus musculus GN=Mpc2 PE=1 SV=1	11	14343	427.506	Q9D023	2	17.32	0	MPC2_MOUSE	46.4983	48.2882	69.9275	49.3599	53.3571	55.4245	66.0945	53.5212	67.3234	61.0429	48.6263	66.2668	53.8092	60.4792	-0.171891	0.614028	0.243205	0.637634
Cend1	Cell cycle exit and neuronal differentiation protein 1 OS=Mus musculus GN=Cend1 PE=1 SV=1	9.55	15044	1679.7	Q9JKC6	3	25.5	0	CEND_MOUSE	290.638	232.371	279.651	255.453	251.43	250.9	283.465	294.739	342.609	270.292	298.836	235.031	260.074	287.495	-0.139382	0.621077	0.239289	0.636525
Pfn1	Profilin-1 OS=Mus musculus GN=Pfn1 PE=1 SV=2	8.48	15128.3	676.437	P62962	3	30	0	PROF1_MOUSE	52.2632	43.2078	43.8638	40.1624	NA	52.7013	50.3992	NA	58.3963	51.3386	45.7353	52.0111	46.4397	51.5761	-0.155528	0.616483	0.241834	0.635799
Lsamp	Limbic system-associated membrane protein OS=Mus musculus GN=Lsamp PE=1 SV=1	6.21	38485.4	1231.03	Q8BLK3	9	29.03	0	LSAMP_MOUSE	434.762	385.642	356.172	371.812	444.834	425.243	458.817	438.125	484.14	561.017	379.471	384.39	403.078	450.993	-0.15385	0.614028	0.243205	0.633009
Aldh3b1	Aldehyde dehydrogenase family 3 member B1 OS=Mus musculus GN=Aldh3b1 PE=1 SV=1	7.39	52976.6	298.487	Q80VQ0	5	11.75	0	AL3B1_MOUSE	192.853	169.226	191.55	166.125	162.473	175.134	170.666	187.296	210.088	198.359	186.192	187.767	176.227	190.061	-0.109371	0.621919	0.238826	0.631463
Atp6v1a	V-type proton ATPase catalytic subunit A OS=Mus musculus GN=Atp6v1a PE=1 SV=2	5.26	68668.4	2222.73	P50516	27	59.32	0	VATA_MOUSE	767.368	711.989	1053.02	1012.92	698.461	661.649	724.7	792.963	874.017	817.445	1410.99	1431.8	817.568	1008.65	-0.270481	0.568652	0.26999	0.629702
Suclg1	Succinate--CoA ligase [ADP/GDP-forming] subunit alpha, mitochondrial OS=Mus musculus GN=Suclg1 PE=1 SV=4	9.75	36497	294.3	Q9WUM5	3	10.4	0	SUCA_MOUSE	74.8682	138.48	141.293	127.753	143.116	171.931	150.932	142.294	127.797	165.34	154.93	173.389	132.907	152.447	-0.234086	0.579079	0.263585	0.624603
Cdc42	Cell division control protein 42 homolog OS=Mus musculus GN=Cdc42 PE=1 SV=2	6.15	21600.8	3584.88	P60766	8	42.41	0	CDC42_MOUSE	271.677	270.499	292.884	262.73	284.185	249.678	233.171	305.463	263.764	336.26	361.206	330.554	271.942	305.07	-0.151765	0.603334	0.249268	0.622129
D10Jhu81e	ES1 protein homolog, mitochondrial OS=Mus musculus GN=D10Jhu81e PE=1 SV=1	9.02	28432.6	1636.87	Q9D172	7	42.48	0	ES1_MOUSE	290.072	333.11	219.157	263.721	175.223	303.266	367.218	164.922	339.641	394.646	370.768	321.294	264.092	326.415	-0.284039	0.546997	0.283794	0.616347
Gnai2	Guanine nucleotide-binding protein G(i) subunit alpha-2 OS=Mus musculus GN=Gnai2 PE=1 SV=5	5.12	41059.3	6775.39	P08752	17	58.03	0	GNAI2_MOUSE	851.571	906.561	960.345	950.141	954.243	846.897	927.361	935.466	916.732	1132.79	980.29	987.835	911.626	980.078	-0.102638	0.603334	0.249268	0.612002
Pdha1	Pyruvate dehydrogenase E1 component subunit alpha, somatic form, mitochondrial OS=Mus musculus GN=Pdha1 PE=1 SV=1	8.14	43916.1	1066.18	P35486	11	33.33	0	ODPA_MOUSE	347.344	345.801	337.499	348.562	383.861	428.496	388.431	414.405	412.982	375.027	399.177	363.696	365.26	392.286	-0.106512	0.599579	0.251432	0.608966
Stxbp1	Syntaxin-binding protein 1 OS=Mus musculus GN=Stxbp1 PE=1 SV=2	6.51	67968	8346.19	O08599	32	64.31	0	STXB1_MOUSE	2814.77	2674.15	2734.54	2711.39	2743.47	2702.71	3003.81	2861.5	3130.94	3132.08	2739.49	2612.57	2730.17	2913.4	-0.0906376	0.599579	0.251432	0.606391
Vdac2	Voltage-dependent anion-selective channel protein 2 OS=Mus musculus GN=Vdac2 PE=1 SV=2	7.37	32360.2	1900.31	Q60930	11	51.53	0	VDAC2_MOUSE	514.291	517.435	560.091	565.415	485.707	382.098	582.902	697.334	527.824	441.402	586.539	563.083	504.173	566.514	-0.166644	0.579079	0.263585	0.60258
Canx	Calnexin OS=Mus musculus GN=Canx PE=1 SV=1	4.29	67677.2	547.893	P35564	6	15.91	0	CALX_MOUSE	428.251	430.455	402.943	448.639	350.125	430.497	467.561	451.156	531.182	425.162	479.467	374.236	415.152	454.794	-0.127842	0.579079	0.263585	0.593022
Tubb4a	Tubulin beta-4A chain OS=Mus musculus GN=Tubb4a PE=1 SV=3	4.59	50042.1	20792	Q9D6F9	24	70.05	0	TBB4A_MOUSE	6012.51	5216.3	5429.16	5712	5826.96	5068.66	5101.23	5963.6	6602.65	5793.7	6820.02	5804.44	5544.27	6014.27	-0.11357	0.579079	0.263585	0.59011
Tppp	Tubulin polymerization-promoting protein OS=Mus musculus GN=Tppp PE=1 SV=1	9.87	23745.7	11640.1	Q7TQD2	8	44.04	0	TPPP_MOUSE	1742.76	1770.92	1442.83	1638.29	1524.52	1417.22	1538.32	1342.52	1552.23	1500.74	1464.05	1446.26	1589.42	1474.02	0.104961	0.579079	0.263585	0.588514
Gna13	Guanine nucleotide-binding protein subunit alpha-13 OS=Mus musculus GN=Gna13 PE=1 SV=1	8.25	44396.9	854.775	P27601	6	19.89	0	GNA13_MOUSE	132.272	116.832	144.204	121.865	124.607	118.444	101.684	96.0254	101.26	126.806	120.717	145.518	126.371	115.335	0.143974	0.565241	0.272119	0.583289
Rab1A	Ras-related protein Rab-1A OS=Mus musculus GN=Rab1A PE=1 SV=3	5.85	22905.9	2726.05	P62821	8	53.17	0	RAB1A_MOUSE	161.86	152.445	155.876	149.027	117.2	121.195	137.861	118.77	116.989	132.606	129.689	143.133	142.934	129.841	0.131333	0.565241	0.272119	0.580298
Ass1	Argininosuccinate synthase OS=Mus musculus GN=Ass1 PE=1 SV=1	8.3	46869.7	474.757	P16460	7	22.09	0	ASSY_MOUSE	220.027	226.065	215.073	186.157	215.122	245.318	175.836	237.061	NA	109.099	219.731	223.604	217.961	193.066	0.222901	0.524165	0.299112	0.569591
Sdhb	Succinate dehydrogenase [ubiquinone] iron-sulfur subunit, mitochondrial OS=Mus musculus GN=Sdhb PE=1 SV=1	8.7	32612.4	421.5	Q9CQA3	3	12.06	0	SDHB_MOUSE	124.529	128.707	143.14	145.795	122.532	151.943	177.378	138.86	155.947	156.128	121.721	144.838	136.108	149.145	-0.127271	0.554246	0.279096	0.568671
Cox6c	Cytochrome c oxidase subunit 6C OS=Mus musculus GN=Cox6c PE=1 SV=3	10.5	8469.03	3263.12	Q9CPQ1	4	36.84	0	COX6C_MOUSE	117.429	99.6345	112.796	114.201	85.536	104.805	160.893	107.303	120.351	105.083	107.812	108.379	105.734	118.303	-0.152844	0.546997	0.283794	0.56795
Ndufv1	NADH dehydrogenase [ubiquinone] flavoprotein 1, mitochondrial OS=Mus musculus GN=Ndufv1 PE=1 SV=1	8.15	51518.6	1153.29	Q91YT0	18	53.66	0	NDUV1_MOUSE	227.794	226.358	283.788	230.186	258.958	243.382	272.021	245.134	255.387	289.214	238.393	279.183	245.078	263.222	-0.104462	0.554246	0.279096	0.564004
Atp6v1d	V-type proton ATPase subunit D OS=Mus musculus GN=Atp6v1d PE=1 SV=1	9.88	28369.1	660.773	P57746	6	33.2	0	VATD_MOUSE	55.4304	51.7845	109.904	94.864	NA	NA	NA	54.5691	96.686	66.6379	145.23	143.443	77.9958	101.313	-0.345274	0.440399	0.362745	0.559612
Ap2b1	AP-2 complex subunit beta OS=Mus musculus GN=Ap2b1 PE=1 SV=1	5.05	105495	227.755	Q9DBG3	3	4.16	0	AP2B1_MOUSE	287.43	241.877	258.771	215.272	277.167	NA	NA	214.172	NA	237.713	221.307	254.437	256.103	231.907	0.138878	0.540975	0.287756	0.558517
Omg	Oligodendrocyte-myelin glycoprotein OS=Mus musculus GN=Omg PE=1 SV=1	8.45	49739.9	422.273	Q63912	5	14.32	0	OMGP_MOUSE	456.905	460.589	459.599	406.069	444.748	436.492	409.618	405.575	404.809	411.808	475.991	406.852	444.067	419.109	0.0845854	0.551548	0.280835	0.557996
Epb41l3	Band 4.1-like protein 3 OS=Mus musculus GN=Epb41l3 PE=1 SV=1	5.03	103794	275.711	Q9WV92	9	15.61	0	E41L3_MOUSE	788.905	787.293	779.884	706.194	524.891	473.619	911.019	927.686	694.842	695.203	655.527	695.869	676.798	763.358	-0.188482	0.525112	0.298461	0.557914
Dpysl3	Dihydropyrimidinase-related protein 3 OS=Mus musculus GN=Dpysl3 PE=1 SV=1	6.03	62335.6	2039.04	Q62188	15	41.93	0	DPYL3_MOUSE	175.188	161.8	185.859	235.594	194.425	246.426	206.059	186.376	201.071	202.532	286.96	270.905	199.882	225.65	-0.17196	0.526711	0.297365	0.554071
Pip4k2a	Phosphatidylinositol 5-phosphate 4-kinase type-2 alpha OS=Mus musculus GN=Pip4k2a PE=1 SV=1	6.53	46379.7	483.76	O70172	7	20.25	0	PI42A_MOUSE	209.994	219.084	217.113	212.697	231.417	282.16	225.326	239.401	250.794	256.695	258.866	237.239	228.744	244.72	-0.103411	0.537874	0.289818	0.547725
Hsp90aa1	Heat shock protein HSP 90-alpha OS=Mus musculus GN=Hsp90aa1 PE=1 SV=4	4.74	85187.2	1776.96	P07901	17	26.88	0	HS90A_MOUSE	531.534	485.856	772.258	493.069	663.862	1850.91	460.033	530.284	660.788	594.872	639.232	580.847	799.582	577.676	0.293807	0.46222	0.344969	0.547695
Mbp	Myelin basic protein OS=Mus musculus GN=Mbp PE=1 SV=2	10.05	27167.7	13281.3	P04370	10	40	0	MBP_MOUSE	74770.7	58961.7	54472.9	62587.7	52063.9	40826.2	61538.3	68383	61558.5	57621.2	63714.3	62128.5	57280.5	62490.6	-0.14785	0.52415	0.299123	0.544604
Tomm70	Mitochondrial import receptor subunit TOM70 OS=Mus musculus GN=Tomm70 PE=1 SV=2	7.38	68331.7	205.935	Q9CZW5	3	5.56	0	TOM70_MOUSE	251.045	203.166	215.777	210.366	175.226	NA	207.11	243.145	247.041	241.65	194.628	252.666	211.116	231.04	-0.132853	0.526711	0.297365	0.543207
Uqcrc1	Cytochrome b-c1 complex subunit 1, mitochondrial OS=Mus musculus GN=Uqcrc1 PE=1 SV=2	5.76	53479.1	3054.08	Q9CZ13	18	53.33	0	QCR1_MOUSE	864.637	1108.71	1061.13	1234.45	1190.89	1249.03	1342.14	1361.09	1059.12	1272.28	1249	1050.6	1118.14	1222.37	-0.131697	0.525112	0.298461	0.541375
Slc25a11	Mitochondrial 2-oxoglutarate/malate carrier protein OS=Mus musculus GN=Slc25a11 PE=1 SV=3	10.25	34326.1	671.639	Q9CR62	7	28.34	0	M2OM_MOUSE	190.003	145.156	209.751	200.089	195.359	193.717	201.297	209.258	226.215	234.717	175.092	188.739	189.012	205.886	-0.125785	0.524165	0.299112	0.539047
Lrrc57	Leucine-rich repeat-containing protein 57 OS=Mus musculus GN=Lrrc57 PE=1 SV=1	8.4	27159.4	547.945	Q9D1G5	3	14.64	0	LRC57_MOUSE	72.8289	81.7721	72.3215	66.567	73.6947	74.9748	81.701	96.5468	78.276	78.0615	72.7266	69.946	73.6932	79.543	-0.105028	0.526711	0.297365	0.53708
Gnao1	Guanine nucleotide-binding protein G(o) subunit alpha OS=Mus musculus GN=Gnao1 PE=1 SV=3	5.19	40654.9	8006.2	P18872	17	58.76	0	GNAO_MOUSE	2862.79	2674.5	2433.35	2521.72	2599.39	2632.29	2814.8	2681.99	3077.16	2984.29	2605.01	2552.04	2620.67	2785.88	-0.0866218	0.526711	0.297365	0.533786
Rab5c	Ras-related protein Rab-5C OS=Mus musculus GN=Rab5c PE=1 SV=2	8.58	23640.7	1456.46	P35278	8	53.24	0	RAB5C_MOUSE	138.498	125.438	129.452	117.43	120.884	127.974	107.224	114.942	116.581	124.966	119.702	133.125	126.613	119.423	0.0856502	0.525112	0.298461	0.532051
Hspe1	10 kDa heat shock protein, mitochondrial OS=Mus musculus GN=Hspe1 PE=1 SV=2	9.12	10962.7	623.144	Q64433	4	45.1	0	CH10_MOUSE	56.6513	NA	49.2737	NA	NA	NA	47.2354	NA	NA	46.2392	NA	48.3475	52.9625	47.274	0.160655	0.506859	0.311273	0.53171
Rala	Ras-related protein Ral-A OS=Mus musculus GN=Rala PE=1 SV=1	6.99	23723.9	1892.5	P63321	6	38.83	0	RALA_MOUSE	365.734	351.109	389.337	340.52	345.184	349.63	380.8	408.429	325.715	367.756	396.752	396.39	356.919	379.307	-0.0853284	0.523998	0.299228	0.5309
Ndufa13	NADH dehydrogenase [ubiquinone] 1 alpha subcomplex subunit 13 OS=Mus musculus GN=Ndufa13 PE=1 SV=3	9.79	16859.7	914.69	Q9ERS2	3	21.53	0	NDUAD_MOUSE	145.78	135.125	155.986	140.943	145.35	167.861	173.001	156.352	149.244	157.296	153.988	152.84	148.508	157.12	-0.0833583	0.521401	0.301022	0.528023
Lancl1	LanC-like protein 1 OS=Mus musculus GN=Lancl1 PE=1 SV=1	7.63	46082.6	370.73	O89112	4	13.28	0	LANC1_MOUSE	150.517	209.2	216.7	167.373	163.663	170.399	198.158	191.164	199.83	208.737	206.382	162.635	179.642	194.484	-0.12261	0.513458	0.306579	0.527894
Gstm1	Glutathione S-transferase Mu 1 OS=Mus musculus GN=Gstm1 PE=1 SV=2	8.12	26084.1	8593.95	P10649	16	72.94	0	GSTM1_MOUSE	1014.18	920.886	991.469	1033.89	1009.58	951.06	959.589	1000.54	1111.32	1058.67	1125.11	995.613	986.844	1041.81	-0.0768346	0.521401	0.301022	0.527032
Gpm6a	Neuronal membrane glycoprotein M6-a OS=Mus musculus GN=Gpm6a PE=1 SV=1	5	31890.9	1664.28	P35802	4	15.47	0	GPM6A_MOUSE	917.944	685.217	671.232	723.053	587.506	492.316	798.969	705.481	1093.66	809.176	637.729	606.389	679.545	775.233	-0.187901	0.49237	0.321833	0.527006
Ndufa2	NADH dehydrogenase [ubiquinone] 1 alpha subcomplex subunit 2 OS=Mus musculus GN=Ndufa2 PE=1 SV=3	10.4	11029.7	1022.76	Q9CQ75	2	23.23	0	NDUA2_MOUSE	73.3595	45.6053	49.8329	46.1172	NA	51.7488	67.8912	NA	84.7029	50.1952	49.918	54.9958	53.3327	61.5406	-0.198791	0.48786	0.325192	0.526807
Hk1	Hexokinase-1 OS=Mus musculus GN=Hk1 PE=1 SV=3	6.35	109615	800.047	P17710	30	36.65	0	HXK1_MOUSE	886.739	840.438	861.361	801.914	1010.78	953.963	925.494	829.396	1141.46	1018.08	915.338	937.378	892.533	961.192	-0.104127	0.513458	0.306579	0.523909
Eno1	Alpha-enolase OS=Mus musculus GN=Eno1 PE=1 SV=3	6.38	47483.1	30720.9	P17182	28	74.42	0	ENOA_MOUSE	6596.8	7881.67	4817.65	6297.21	7046.23	6311.23	7418.17	7334.07	7265.35	6293.5	7499.25	6351.49	6491.8	7026.97	-0.126055	0.506859	0.311273	0.522298
Kcna1	Potassium voltage-gated channel subfamily A member 1 OS=Mus musculus GN=Kcna1 PE=1 SV=1	4.85	56865.7	764.703	P16388	13	32.93	0	KCNA1_MOUSE	371.859	296.511	350.648	300.846	333.385	355.201	321.131	385.582	380.269	347.96	381.794	327.375	334.742	357.352	-0.0953612	0.506859	0.311273	0.515751
Tpi1	Triosephosphate isomerase OS=Mus musculus GN=Tpi1 PE=1 SV=4	5.43	32705.1	944.177	P17751	9	42.14	0	TPIS_MOUSE	231.777	198.647	192.784	202.928	233.58	287.241	223.771	190.923	289.199	270.638	253.548	250.531	224.493	246.435	-0.135603	0.489231	0.324167	0.507676
Cpm	Carboxypeptidase M OS=Mus musculus GN=Cpm PE=1 SV=2	7.65	50955.1	860.354	Q80V42	13	34.54	0	CBPM_MOUSE	962.592	3040.41	3044.13	2320.83	2725.28	2282.75	1318.55	1874.76	726.699	2964.91	2600.53	2584.65	2396	2011.68	0.307542	0.400906	0.397278	0.50528
Gap43	Neuromodulin OS=Mus musculus GN=Gap43 PE=1 SV=1	4.43	23746.5	1136.29	P06837	4	36.56	0	NEUM_MOUSE	197.485	132.097	162.229	105.366	67.136	170.193	165.176	67.135	288.035	221.842	160.046	154.692	139.084	176.154	-0.297281	0.408358	0.390519	0.505106
Atp6v1b2	V-type proton ATPase subunit B, brain isoform OS=Mus musculus GN=Atp6v1b2 PE=1 SV=1	5.45	56893.1	2925.4	P62814	22	61.06	0	VATB2_MOUSE	535.55	667.24	914.59	1122	679.866	632.118	717.791	877.724	628.384	680.461	1226.47	1164.37	758.561	882.534	-0.214601	0.455729	0.350164	0.503728
Nptn	Neuroplastin OS=Mus musculus GN=Nptn PE=1 SV=3	7.66	44715.3	239.845	P97300	2	4.79	0	NPTN_MOUSE	354.779	332.22	384.9	371.377	307.957	253.011	358.108	393.454	360.057	318.787	357.537	363.002	334.041	358.491	-0.112853	0.489231	0.324167	0.502078
Gnb4	Guanine nucleotide-binding protein subunit beta-4 OS=Mus musculus GN=Gnb4 PE=1 SV=4	5.7	38120.4	2137.63	P29387	8	45.88	0	GBB4_MOUSE	280.276	259.021	275.448	267.408	241.385	267.915	265.039	308.402	227.517	273.433	356.978	301.87	265.242	288.873	-0.110681	0.489231	0.324167	0.501594
Kcnab2	Voltage-gated potassium channel subunit beta-2 OS=Mus musculus GN=Kcnab2 PE=1 SV=1	9.23	41306.5	1459.81	P62482	10	41.14	0	KCAB2_MOUSE	516.143	510.936	599.864	488.292	555.992	521.652	466.081	434.271	419.288	509.772	597.349	554.355	532.146	496.853	0.107515	0.489231	0.324167	0.500905
Cisd1	CDGSH iron-sulfur domain-containing protein 1 OS=Mus musculus GN=Cisd1 PE=1 SV=1	9.43	12268.1	1069.03	Q91WS0	3	34.26	0	CISD1_MOUSE	95.3842	88.8572	105.824	98.9247	60.2112	94.1667	100.147	65.1174	125.422	130.916	106.228	96.0566	90.5614	103.981	-0.186489	0.464652	0.343042	0.500679
Fam49b	Protein FAM49B OS=Mus musculus GN=Fam49b PE=1 SV=1	5.68	37061.2	534.766	Q921M7	3	13.27	0	FA49B_MOUSE	115.533	110.879	132.754	131.652	126.684	118.065	130.631	108.812	NA	136.076	132.711	153.924	122.595	132.431	-0.105851	0.489231	0.324167	0.500551
Actbl2	Beta-actin-like protein 2 OS=Mus musculus GN=Actbl2 PE=1 SV=1	5.15	42346.5	3683.11	Q8BFZ3	10	26.06	0	ACTBL_MOUSE	4592.01	3677.14	3812.6	3455.37	3916.43	3897.09	3547.76	3368.75	3381.5	3446.1	3657.43	4409.39	3891.77	3635.16	0.09935	0.489231	0.324167	0.499216
Cct2	T-complex protein 1 subunit beta OS=Mus musculus GN=Cct2 PE=1 SV=4	5.95	57819.5	275.745	P80314	2	5.98	0	TCPB_MOUSE	162.887	184.372	168.965	148.697	153.097	162.187	163.931	148.808	186.018	169.104	205.537	176.124	163.367	174.92	-0.0946988	0.48786	0.325192	0.496966
Ap2m1	AP-2 complex subunit mu OS=Mus musculus GN=Ap2m1 PE=1 SV=1	9.88	49996.9	305.342	P84091	2	8.05	0	AP2M1_MOUSE	130.658	150.349	210.226	164.237	171.178	152.779	NA	178.923	NA	198.702	163.149	171.282	163.238	178.014	-0.136665	0.47597	0.334218	0.495202
Macrod1	O-acetyl-ADP-ribose deacetylase MACROD1 OS=Mus musculus GN=Macrod1 PE=1 SV=2	8.99	35865	485.712	Q922B1	3	13.62	0	MACD1_MOUSE	155.211	165.039	147.234	146.68	135.764	146.605	156.552	149.705	167.433	152.862	169.445	147.504	149.422	157.25	-0.0742165	0.48786	0.325192	0.493473
Syn2	Synapsin-2 OS=Mus musculus GN=Syn2 PE=1 SV=2	8.56	63657.8	1125.13	Q64332	13	34.3	0	SYN2_MOUSE	800.448	887.309	837.726	850.307	865.798	919.034	937.626	862.487	902.458	826.81	972.468	915.865	860.103	902.952	-0.0694774	0.48786	0.325192	0.492783
Cox5a	Cytochrome c oxidase subunit 5A, mitochondrial OS=Mus musculus GN=Cox5a PE=1 SV=2	6.08	16329.6	2537.56	P12787	6	38.36	0	COX5A_MOUSE	113.445	112.36	202.452	71.9025	NA	48.9798	239.558	NA	64.277	183.399	53.4726	192.126	109.828	146.566	-0.334916	0.355508	0.441055	0.48842
Park7	Protein DJ-1 OS=Mus musculus GN=Park7 PE=1 SV=1	6.36	20249.5	374.234	Q99LX0	2	15.34	0	PARK7_MOUSE	47.2944	40.4919	41.0358	40.8029	NA	59.0083	NA	NA	NA	56.6407	55.2571	41.941	45.7266	51.2796	-0.168299	0.455729	0.350164	0.485812
Ndufb8	NADH dehydrogenase [ubiquinone] 1 beta subcomplex subunit 8, mitochondrial OS=Mus musculus GN=Ndufb8 PE=1 SV=1	6.17	21932.9	522.635	Q9D6J5	2	18.28	0	NDUB8_MOUSE	77.3916	63.7879	72.3791	77.7121	74.9894	63.8542	59.3524	82.0067	103.172	80.2517	77.5204	70.5748	71.6857	78.813	-0.121608	0.46222	0.344969	0.477949
Eef1a2	Elongation factor 1-alpha 2 OS=Mus musculus GN=Eef1a2 PE=1 SV=1	9.35	50796.4	6111.1	P62631	18	62.63	0	EF1A2_MOUSE	1755.68	1470.28	1511.4	1449.44	1781.42	2110.42	1692.48	1352.06	1562.02	1321.21	1698.18	1646.21	1679.77	1545.36	0.114558	0.463154	0.344228	0.477111
Sirt2	NAD-dependent protein deacetylase sirtuin-2 OS=Mus musculus GN=Sirt2 PE=1 SV=2	5.06	43883.6	24593.9	Q8VDQ8	24	70.44	0	SIR2_MOUSE	10898.3	8890.59	8615.4	9673.38	8751.75	6917.31	8163.58	10080.9	9050.64	10078.3	10019.8	10164.4	8957.78	9592.93	-0.107526	0.46222	0.344969	0.474562
Tufm	Elongation factor Tu, mitochondrial OS=Mus musculus GN=Tufm PE=1 SV=1	7.32	49907.6	753.711	Q8BFR5	12	33.63	0	EFTU_MOUSE	339.072	277.553	293.671	295.692	344.085	399.52	328.692	358.299	412.054	319.011	346.719	322.312	324.932	347.848	-0.103814	0.46222	0.344969	0.473734
Rab18	Ras-related protein Rab-18 OS=Mus musculus GN=Rab18 PE=1 SV=2	5.06	23320.3	648.05	P35293	5	27.18	0	RAB18_MOUSE	63.961	55.9271	61.1221	55.3804	57.9586	66.9401	67.9553	62.7659	85.0919	58.3175	57.5582	59.3414	60.2149	65.1717	-0.103646	0.46222	0.344969	0.473698
Atp5o	ATP synthase subunit O, mitochondrial OS=Mus musculus GN=Atp5o PE=1 SV=1	10.41	23420.6	3848.36	Q9DB20	10	62.44	0	ATPO_MOUSE	489.113	461.357	543.485	445.246	464.022	522.918	639.59	519.188	458.313	508.017	493.441	508.038	487.69	521.098	-0.0914593	0.463378	0.34405	0.472318
Oxct1	Succinyl-CoA:3-ketoacid coenzyme A transferase 1, mitochondrial OS=Mus musculus GN=Oxct1 PE=1 SV=1	8.68	56387.9	812.06	Q9D0K2	9	25	0	SCOT1_MOUSE	443.819	443.042	396.39	481.984	347.207	315.113	437.346	534.615	366.757	383.375	455.646	457.791	404.593	439.255	-0.123078	0.455729	0.350164	0.472056
Clic4	Chloride intracellular channel protein 4 OS=Mus musculus GN=Clic4 PE=1 SV=3	5.28	28957.2	1666.51	Q9QYB1	8	47.04	0	CLIC4_MOUSE	266.64	311.452	302.026	282.999	333.756	316.209	273.369	259.59	251.961	333.155	305.996	284.955	302.18	284.838	0.0880543	0.46222	0.344969	0.470532
Cd9	CD9 antigen OS=Mus musculus GN=Cd9 PE=1 SV=2	6.96	25828.3	1592.38	P40240	4	26.11	0	CD9_MOUSE	1418.23	789.862	726.88	640.5	753.321	739.421	682.085	557.168	1038.17	762.337	672.099	685.549	844.702	732.901	0.177966	0.433646	0.368429	0.468744
Atp2b1	Plasma membrane calcium-transporting ATPase 1 OS=Mus musculus GN=Atp2b1 PE=1 SV=1	5.54	135717	375.938	G5E829	10	11.07	0	AT2B1_MOUSE	539.171	578.943	551.81	567.504	440.034	432.24	539.133	521.205	506.474	606.909	571.301	552.663	518.284	549.614	-0.0921173	0.455729	0.350164	0.464945
Ogdh	2-oxoglutarate dehydrogenase, mitochondrial OS=Mus musculus GN=Ogdh PE=1 SV=3	6.36	117647	287.11	Q60597	11	13.59	0	ODO1_MOUSE	536.236	460.742	592.001	488.714	543.445	764.101	594.62	638.723	670.572	594.03	550.65	566.663	564.206	602.543	-0.111566	0.448395	0.356127	0.462067
Acot13	Acyl-coenzyme A thioesterase 13 OS=Mus musculus GN=Acot13 PE=1 SV=1	9.31	15297	2715.05	Q9CQR4	5	42.14	0	ACO13_MOUSE	165.477	150.729	130.612	172.51	72.8488	112.733	157.189	85.7525	248.803	143.014	170.086	139.26	134.152	157.351	-0.216586	0.405066	0.393491	0.459334
Gpm6b	Neuronal membrane glycoprotein M6-b OS=Mus musculus GN=Gpm6b PE=1 SV=2	5.72	37008.2	1946.98	P35803	4	15.55	0	GPM6B_MOUSE	710.801	612.35	732.906	589.454	642.437	549.732	425.175	565.465	637.086	659.87	673.578	604.845	639.613	594.336	0.11492	0.441933	0.361466	0.45663
Crmp1	Dihydropyrimidinase-related protein 1 OS=Mus musculus GN=Crmp1 PE=1 SV=1	6.78	62510	3778.37	P97427	25	70.1	0	DPYL1_MOUSE	2358.57	2232.79	1622.97	1724.68	2251.44	1693.75	2154.76	1847.45	2043.08	1959.62	2484.47	2265.3	1980.7	2125.78	-0.112374	0.440399	0.362745	0.45451
Mdh1	Malate dehydrogenase, cytoplasmic OS=Mus musculus GN=Mdh1 PE=1 SV=3	6.15	36682.3	1725.52	P14152	10	38.62	0	MDHC_MOUSE	330.962	354.914	394.989	384.315	529.305	507.35	358.949	426.259	454.702	507.332	463.644	489.465	416.972	450.058	-0.123711	0.436454	0.366055	0.453648
Hspa9	Stress-70 protein, mitochondrial OS=Mus musculus GN=Hspa9 PE=1 SV=3	5.7	73746.5	248.512	P38647	3	5.01	0	GRP75_MOUSE	232.49	105.384	182.298	150.168	146.644	237.812	191.299	194.583	318.742	210.003	122.554	176.749	175.8	202.322	-0.201047	0.405066	0.393491	0.452215
Apoo	MICOS complex subunit Mic26 OS=Mus musculus GN=Apoo PE=1 SV=2	9.52	22718.1	471.147	Q9DCZ4	3	18.18	0	MIC26_MOUSE	68.6927	83.8866	69.7249	92.1065	73.599	76.2725	94.7432	93.5128	85.04	97.4515	72.3196	62.6529	77.3804	84.2866	-0.113226	0.433646	0.368429	0.448184
Ank3	Ankyrin-3 OS=Mus musculus GN=Ank3 PE=1 SV=1	6.22	215545	126.633	G5E8K5	3	2.24	0	ANK3_MOUSE	685.82	570.689	652.16	572.554	544.5	747.548	NA	648.753	NA	559.764	590.291	535.101	628.879	583.477	0.102447	0.435157	0.36715	0.447054
Cntnap1	Contactin-associated protein 1 OS=Mus musculus GN=Cntnap1 PE=1 SV=2	6.62	158308	596.792	O54991	22	22.31	0	CNTP1_MOUSE	1786.49	1663.13	1639.19	1765.66	1422.6	1592.28	1411.95	1758.85	1725.68	1333.01	1583.72	1519.9	1644.89	1555.52	0.0837282	0.439023	0.363896	0.446936
Atp6v1e1	V-type proton ATPase subunit E 1 OS=Mus musculus GN=Atp6v1e1 PE=1 SV=2	8.89	26214.5	3588.2	P50518	9	37.61	0	VATE1_MOUSE	574.581	508.933	574.698	582.037	476.015	435.722	489.346	528.221	537.885	527.459	656.268	623.688	525.331	560.478	-0.0941918	0.435157	0.36715	0.445234
Pdia3	Protein disulfide-isomerase A3 OS=Mus musculus GN=Pdia3 PE=1 SV=2	5.81	57134.7	435.657	P27773	5	14.85	0	PDIA3_MOUSE	156.271	147.731	180.979	169.964	179.289	199.295	204.029	174.251	193.099	160.792	181.259	178.263	172.255	181.949	-0.081881	0.435157	0.36715	0.442793
Hcn2	Potassium/sodium hyperpolarization-activated cyclic nucleotide-gated channel 2 OS=Mus musculus GN=Hcn2 PE=1 SV=1	8.77	95577.5	161.006	O88703	2	2.78	0	HCN2_MOUSE	213.139	148.362	223.553	182.136	174.304	NA	NA	243.847	NA	NA	207.483	173.816	188.299	208.382	-0.147878	0.408358	0.390519	0.434309
Hagh	Hydroxyacylglutathione hydrolase, mitochondrial OS=Mus musculus GN=Hagh PE=1 SV=2	7.61	34540.4	428.407	Q99KB8	4	15.53	0	GLO2_MOUSE	180.53	334.056	588.621	298.265	562.081	1547.74	313.734	295.443	240.769	239.69	764.09	726.295	585.215	430.004	0.272265	0.331658	0.465953	0.429099
Ldha	L-lactate dehydrogenase A chain OS=Mus musculus GN=Ldha PE=1 SV=3	7.67	36840.8	542.912	P06151	6	20.18	0	LDHA_MOUSE	123.104	138.476	177.665	146.733	167.729	150.238	124.812	118.425	187.316	187.519	187.557	196.054	150.657	166.947	-0.128262	0.407419	0.391364	0.427132
Mobp	Myelin-associated oligodendrocyte basic protein OS=Mus musculus GN=Mobp PE=1 SV=1	11.57	19596.5	12997.7	Q9D2P8	6	34.12	0	MOBP_MOUSE	882.456	4642.54	3971.07	4253.44	3405.7	2474.06	2130.17	2399.26	814.536	3790.32	3619.54	3422.78	3271.55	2696.1	0.262767	0.333638	0.463834	0.424689
Gng2	Guanine nucleotide-binding protein G(I)/G(S)/G(O) subunit gamma-2 OS=Mus musculus GN=Gng2 PE=1 SV=2	8.25	7964.22	1586.78	P63213	3	52.11	0	GBG2_MOUSE	40.0868	38.5069	44.1348	42.7543	27.6809	31.1903	35.4325	35.027	46.9426	36.7099	43.5912	43.0683	37.3923	40.1286	-0.112508	0.408358	0.390519	0.423573
Myadm	Myeloid-associated differentiation marker OS=Mus musculus GN=Myadm PE=1 SV=2	8.23	36026	338.894	O35682	3	10.31	0	MYADM_MOUSE	96.6051	112.39	129.457	91.4821	90.8837	101.513	112.177	97.9297	NA	107.896	118.645	112.578	103.722	109.845	-0.091484	0.410975	0.388172	0.421034
Tkt	Transketolase OS=Mus musculus GN=Tkt PE=1 SV=1	7.23	68314.9	3818.34	P40142	27	61	0	TKT_MOUSE	3134.15	2641.95	3071.68	2683.89	3060.34	2690.06	2354.47	3611.98	2340.3	2187.11	2874.15	2926.85	2880.34	2715.81	0.102994	0.407419	0.391364	0.420236
Tagln3	Transgelin-3 OS=Mus musculus GN=Tagln3 PE=1 SV=1	7.17	22641.8	790.521	Q9R1Q8	6	40.2	0	TAGL3_MOUSE	68.5724	92.784	95.5238	103.766	41.256	73.5484	82.5769	53.6585	NA	45.1429	89.7456	73.6869	79.2419	68.9621	0.186064	0.375694	0.421023	0.419244
Gng7	Guanine nucleotide-binding protein G(I)/G(S)/G(O) subunit gamma-7 OS=Mus musculus GN=Gng7 PE=1 SV=2	8.97	7593.75	2725.5	Q61016	3	47.06	0	GBG7_MOUSE	30.3964	45.9493	41.8835	50.3398	32.8176	52.7901	51.9469	51.6903	41.6126	41.8942	40.0831	44.3442	42.3628	45.2619	-0.117612	0.40077	0.397402	0.417671
Ndufs4	NADH dehydrogenase [ubiquinone] iron-sulfur protein 4, mitochondrial OS=Mus musculus GN=Ndufs4 PE=1 SV=3	10.45	19841.8	377.309	Q9CXZ1	3	20	0	NDUS4_MOUSE	76.6837	71.2077	70.6852	84.504	54.4662	105.835	93.1848	63.7883	100.509	79.9991	87.1485	75.6169	77.2304	83.3744	-0.124052	0.398654	0.399343	0.41751
Ywhaq	14-3-3 protein theta OS=Mus musculus GN=Ywhaq PE=1 SV=1	4.49	28063.5	3793.89	P68254	11	50.2	0	1433T_MOUSE	463.023	452.759	458.722	435.618	546.976	505.781	427.224	447.445	569.345	559.757	529.492	498.255	477.147	505.253	-0.0786326	0.407419	0.391364	0.414938
Sucla2	Succinate--CoA ligase [ADP-forming] subunit beta, mitochondrial OS=Mus musculus GN=Sucla2 PE=1 SV=2	6.62	50456.2	182.505	Q9Z2I9	2	4.75	0	SUCB1_MOUSE	103.667	192.849	267.728	182.799	235.105	204.049	175.427	191.852	NA	230.962	226.462	243.452	197.7	213.631	-0.158839	0.381801	0.415145	0.413523
Wdr1	WD repeat-containing protein 1 OS=Mus musculus GN=Wdr1 PE=1 SV=3	6.11	67091.1	653.561	O88342	10	28.38	0	WDR1_MOUSE	428.392	421.553	506.77	547.11	388.302	409.949	411.566	398.229	358.042	339.434	521.476	500.177	450.346	421.487	0.102901	0.399798	0.398292	0.412828
Dlst	Dihydrolipoyllysine-residue succinyltransferase component of 2-oxoglutarate dehydrogenase complex, mitochondrial OS=Mus musculus GN=Dlst PE=1 SV=1	9.26	49336.8	425.361	Q9D2G2	5	10.35	0	ODO2_MOUSE	279.849	262.626	285.804	287.713	252.123	309.023	297.445	315.602	302.057	246.871	294.527	300.489	279.523	292.832	-0.0659782	0.407419	0.391364	0.412727
Dnm1	Dynamin-1 OS=Mus musculus GN=Dnm1 PE=1 SV=2	7.64	98202.2	3294.75	P39053	39	53.98	0	DYN1_MOUSE	2175.2	2013.27	3308.67	1871.82	2604.61	1839.86	1832.56	1823.58	2077.1	2134.05	2236.49	2437.49	2302.24	2090.21	0.114436	0.396342	0.401475	0.412531
Mtco2	Cytochrome c oxidase subunit 2 OS=Mus musculus GN=Mtco2 PE=1 SV=1	4.41	26147.6	1954.42	P00405	6	30.84	0	COX2_MOUSE	1203.48	931.602	1116.55	1076.9	1027.84	1015.9	1037.92	1065.63	999.701	1032.52	973.852	986.899	1062.04	1016.09	0.0599002	0.407419	0.391364	0.411799
Atp6v1c1	V-type proton ATPase subunit C 1 OS=Mus musculus GN=Atp6v1c1 PE=1 SV=4	7.3	44058.7	1545.91	Q9Z1G3	21	61.78	0	VATC1_MOUSE	663.979	703.504	579.997	565.958	556.947	493.495	580.055	598.738	432.668	525.188	611.669	600.567	593.98	558.147	0.089955	0.40077	0.397402	0.410742
Gng12	Guanine nucleotide-binding protein G(I)/G(S)/G(O) subunit gamma-12 OS=Mus musculus GN=Gng12 PE=1 SV=3	9.48	8111.3	12252.2	Q9DAS9	5	69.44	0	GBG12_MOUSE	199.604	241.6	198.545	260.036	205.899	225.331	225.305	212.068	202.265	299.769	243.371	236.259	221.836	236.506	-0.0880188	0.400906	0.397278	0.410454
Hepacam	Hepatocyte cell adhesion molecule OS=Mus musculus GN=Hepacam PE=1 SV=2	9.73	46595	734.965	Q640R3	10	34.45	0	HECAM_MOUSE	662.369	649.521	757.988	690.646	632.797	579.552	625.581	591.889	696.284	823.103	751.56	714.167	662.145	700.431	-0.0772677	0.400906	0.397278	0.408284
Cadm2	Cell adhesion molecule 2 OS=Mus musculus GN=Cadm2 PE=1 SV=2	5.08	48015.1	519.138	Q8BLQ9	5	17.93	0	CADM2_MOUSE	169.645	146.979	159.717	155.089	163.369	184.93	153.486	159.278	NA	190.273	184.217	170.622	163.288	171.575	-0.0703433	0.400906	0.397278	0.40703
Mapk1	Mitogen-activated protein kinase 1 OS=Mus musculus GN=Mapk1 PE=1 SV=3	6.53	41674.9	238.309	P63085	3	10.89	0	MK01_MOUSE	128.472	152.634	126.886	141.805	170.577	133.784	123.065	89.7332	NA	128.752	160.344	164.773	142.36	133.333	0.119675	0.389001	0.408318	0.406994
Tppp3	Tubulin polymerization-promoting protein family member 3 OS=Mus musculus GN=Tppp3 PE=1 SV=1	9.52	19136.6	1702.09	Q9CRB6	7	39.2	0	TPPP3_MOUSE	195.855	222.686	194.891	210.956	131.2	191.945	228.412	150.874	202.191	198.348	237.729	216.846	191.256	205.733	-0.109642	0.389001	0.408318	0.404157
Ndufs3	NADH dehydrogenase [ubiquinone] iron-sulfur protein 3, mitochondrial OS=Mus musculus GN=Ndufs3 PE=1 SV=2	6.77	30320.4	856.997	Q9DCT2	7	28.9	0	NDUS3_MOUSE	206.095	196.432	219.905	219.728	219.664	252.306	239.993	238.264	238.84	229.814	212.207	208.679	219.022	227.966	-0.0597352	0.397697	0.400224	0.402158
Igsf8	Immunoglobulin superfamily member 8 OS=Mus musculus GN=Igsf8 PE=1 SV=2	7.9	65638.3	3138.69	Q8R366	16	42.06	0	IGSF8_MOUSE	2084.07	2196.63	2010.35	1807.99	2001.85	1941.48	2072.76	2073.37	1583.71	1930.18	1986.2	1899.45	2007.06	1924.28	0.0639748	0.396342	0.401475	0.401472
Hrsp12	Ribonuclease UK114 OS=Mus musculus GN=Hrsp12 PE=1 SV=3	9.13	14312.5	1352.01	P52760	6	59.26	0	UK114_MOUSE	89.2731	79.3589	86.3827	114.634	36.6417	98.6781	114.185	41.1252	122.597	99.3962	99.3774	99.7334	84.1615	96.069	-0.193469	0.34761	0.449149	0.397823
Sdha	Succinate dehydrogenase [ubiquinone] flavoprotein subunit, mitochondrial OS=Mus musculus GN=Sdha PE=1 SV=1	7.03	73669	424.218	Q8K2B3	11	29.07	0	SDHA_MOUSE	365.579	413.007	465.183	483.921	516.948	509.655	502.575	542.399	481.651	448.405	535.078	399.853	459.049	484.994	-0.082041	0.388985	0.408333	0.397543
Sptan1	Spectrin alpha chain, non-erythrocytic 1 OS=Mus musculus GN=Sptan1 PE=1 SV=4	5.04	285396	580.34	P16546	78	41.75	0	SPTN1_MOUSE	4170.61	3765.33	3847.03	4015.2	3186.15	3058.07	3926.43	3491.01	4222.06	3898.61	3527.13	3980.99	3673.73	3841.04	-0.0704503	0.386787	0.410405	0.393151
Nipsnap1	Protein NipSnap homolog 1 OS=Mus musculus GN=Nipsnap1 PE=1 SV=1	9.71	33591.4	578.025	O55125	5	26.76	0	NIPS1_MOUSE	192.629	195.635	227.222	208.802	200.362	195.795	200.444	229.707	205.942	193.573	221.984	214.274	203.407	210.987	-0.0526415	0.388985	0.408333	0.392531
Aldh1b1	Aldehyde dehydrogenase X, mitochondrial OS=Mus musculus GN=Aldh1b1 PE=1 SV=1	6.61	58123.3	257.312	Q9CZS1	4	8.86	0	AL1B1_MOUSE	231.729	232.651	215.849	231.854	171.039	182.245	172.188	207.369	289.072	187.945	281.864	235.689	210.894	229.021	-0.102626	0.37466	0.422027	0.388461
Vsnl1	Visinin-like protein 1 OS=Mus musculus GN=Vsnl1 PE=1 SV=2	4.82	22313.5	1291.83	P62761	9	55.5	0	VISL1_MOUSE	212.06	188.171	198.678	188.175	183.847	169.543	199.305	193.643	149.301	161.114	194.749	193.874	190.079	181.998	0.0679605	0.381801	0.415145	0.387802
Acot7	Cytosolic acyl coenzyme A thioester hydrolase OS=Mus musculus GN=Acot7 PE=1 SV=2	8.79	42993.2	269.686	Q91V12	3	9.97	0	BACH_MOUSE	158.978	157.945	184.495	158.373	251.288	194.957	192.043	183.894	227.301	168.087	180.779	213.535	184.339	194.273	-0.0891932	0.37466	0.422027	0.38513
Gnb1	Guanine nucleotide-binding protein G(I)/G(S)/G(T) subunit beta-1 OS=Mus musculus GN=Gnb1 PE=1 SV=3	5.54	38175.4	12688.7	P62874	11	59.12	0	GBB1_MOUSE	1583.45	1821.37	1896.16	1891.93	1685.63	1590.45	1779.53	1961.97	1305.39	1985.63	2109.47	2063.51	1744.83	1867.58	-0.0843493	0.375694	0.421023	0.385046
Ndufa9	NADH dehydrogenase [ubiquinone] 1 alpha subcomplex subunit 9, mitochondrial OS=Mus musculus GN=Ndufa9 PE=1 SV=2	10.06	42639.3	888.783	Q9DC69	9	33.42	0	NDUA9_MOUSE	259.496	239.088	289.863	249.088	254.532	246.493	244.877	262.968	299.62	266.132	253.573	268.536	256.427	265.951	-0.0525105	0.379757	0.417102	0.383371
Gng3	Guanine nucleotide-binding protein G(I)/G(S)/G(O) subunit gamma-3 OS=Mus musculus GN=Gng3 PE=1 SV=1	7.84	8532.89	2231.62	P63216	3	69.33	0	GBG3_MOUSE	33.7745	40.1048	38.1761	37.1573	31.1183	27.17	35.44	25.8034	39.0293	37.6936	43.4648	41.3118	34.5835	37.1238	-0.095402	0.370954	0.425644	0.383025
Hprt1	Hypoxanthine-guanine phosphoribosyltransferase OS=Mus musculus GN=Hprt1 PE=1 SV=3	6.23	24798.5	374.454	P00493	2	11.93	0	HPRT_MOUSE	NA	NA	81.2489	75.2836	NA	NA	NA	NA	79.2285	NA	55.4698	80.8798	78.2663	71.8594	0.142842	0.354721	0.441854	0.382401
Ndufa10	NADH dehydrogenase [ubiquinone] 1 alpha subcomplex subunit 10, mitochondrial OS=Mus musculus GN=Ndufa10 PE=1 SV=1	7.73	40888.6	411.055	Q99LC3	8	28.73	0	NDUAA_MOUSE	191.02	171.929	202.194	210.248	229.973	244.247	239.804	227.397	202.333	200.325	225.864	207.629	208.268	217.225	-0.0670713	0.375694	0.421023	0.381634
Rab1b	Ras-related protein Rab-1B OS=Mus musculus GN=Rab1b PE=1 SV=1	5.39	22358.3	2988.7	Q9D1G1	6	43.28	0	RAB1B_MOUSE	90.2367	85.8679	82.8239	75.3417	70.3032	74.5578	87.305	67.8777	80.3632	83.7026	89.7731	93.5003	79.8552	83.7536	-0.0667975	0.37466	0.422027	0.380568
Pcmt1	Protein-L-isoaspartate(D-aspartate) O-methyltransferase OS=Mus musculus GN=Pcmt1 PE=1 SV=3	7.59	24691.5	348.129	P23506	3	29.07	0	PIMT_MOUSE	124.462	101.798	105.85	117.998	69.6647	111.248	113.889	79.674	138.164	88.53	140.161	128.993	105.17	114.902	-0.118387	0.358439	0.438087	0.377484
Slc6a11	Sodium- and chloride-dependent GABA transporter 3 OS=Mus musculus GN=Slc6a11 PE=1 SV=2	6.63	71386.8	268.516	P31650	4	7.02	0	S6A11_MOUSE	281.323	313.514	460.634	457.796	366.459	429.539	465.979	433.768	449.476	397.503	377.857	321.495	384.877	407.68	-0.0972517	0.3634	0.433111	0.376188
Hsp90ab1	Heat shock protein HSP 90-beta OS=Mus musculus GN=Hsp90ab1 PE=1 SV=3	4.78	83623.5	1763	P11499	17	27.9	0	HS90B_MOUSE	435.789	481.999	805.027	458.03	680.243	1687.27	520.907	569.429	690.632	631.208	572.087	608.648	758.059	598.819	0.163565	0.333638	0.463834	0.371574
Aspa	Aspartoacylase OS=Mus musculus GN=Aspa PE=1 SV=2	6.11	35800.9	620.928	Q8R3P0	5	23.08	0	ACY2_MOUSE	164.422	185.942	184.357	177.905	193.041	184.869	165.693	151.804	227.038	226.748	187.553	198.452	181.756	192.881	-0.0715956	0.3634	0.433111	0.370386
Uqcrq	Cytochrome b-c1 complex subunit 8 OS=Mus musculus GN=Uqcrq PE=1 SV=3	10.54	9768.27	704.284	Q9CQ69	3	36.59	0	QCR8_MOUSE	45.3225	48.4931	80.4731	52.0235	38.3456	55.9192	56.7628	44.265	73.4878	75.498	40.745	57.8255	53.4295	58.0973	-0.12255	0.34761	0.449149	0.36858
Vdac3	Voltage-dependent anion-selective channel protein 3 OS=Mus musculus GN=Vdac3 PE=1 SV=1	9	31094.9	1730.15	Q60931	9	37.46	0	VDAC3_MOUSE	772.679	775.624	809.106	819.22	791.074	789.263	743.016	889.644	943.259	852.73	722.588	796.049	792.828	824.547	-0.0503778	0.358272	0.438256	0.361796
Map6	Microtubule-associated protein 6 OS=Mus musculus GN=Map6 PE=1 SV=2	9.92	96735	706.593	Q7TSJ2	23	33.66	0	MAP6_MOUSE	1057.81	1003.85	752.466	954.063	1132.63	1166.11	970.467	969.892	1484.97	1143.22	1038.4	876.734	1011.16	1080.61	-0.0884799	0.34761	0.449149	0.358694
Dpysl4	Dihydropyrimidinase-related protein 4 OS=Mus musculus GN=Dpysl4 PE=1 SV=1	6.52	62531.9	605.716	O35098	10	30.94	0	DPYL4_MOUSE	301.645	251.946	275.584	249.915	317.874	342.367	242.652	261.048	416.245	313.636	326.641	296.941	289.888	309.527	-0.0822859	0.34761	0.449149	0.357216
Gpx4	Phospholipid hydroperoxide glutathione peroxidase, mitochondrial OS=Mus musculus GN=Gpx4 PE=1 SV=4	8.44	22649	655.353	O70325	5	28.43	0	GPX41_MOUSE	140.413	108.446	163.576	130.107	120.568	150.298	139.993	100.18	189.735	190.338	114.57	154.927	135.568	148.291	-0.102386	0.340218	0.456858	0.355291
Ndufb10	NADH dehydrogenase [ubiquinone] 1 beta subcomplex subunit 10 OS=Mus musculus GN=Ndufb10 PE=1 SV=3	8.08	21309	731.154	Q9DCS9	5	33.52	0	NDUBA_MOUSE	74.8496	81.1123	89.0198	97.1618	78.3171	113.984	101.298	77.5502	97.8565	88.8339	97.7702	94.0453	89.0741	92.8924	-0.0702797	0.34761	0.449149	0.354643
Ckb	Creatine kinase B-type OS=Mus musculus GN=Ckb PE=1 SV=1	5.29	42998.5	7836.35	Q04447	14	60.37	0	KCRB_MOUSE	1988.14	1803.18	1773.45	1919.61	2138.19	2631.05	2141.79	2049.16	2344.66	2401.67	2073.64	1777.28	2042.27	2131.37	-0.0679602	0.34761	0.449149	0.354191
Basp1	Brain acid soluble protein 1 OS=Mus musculus GN=Basp1 PE=1 SV=3	4.29	22086.6	4953.11	Q91XV3	9	67.26	0	BASP1_MOUSE	878.419	777.287	711.144	640.301	461.734	431.393	670.737	688.019	511.534	463.6	594.356	611.057	650.046	589.884	0.106628	0.336033	0.461283	0.352544
Ndufa4	Cytochrome c oxidase subunit NDUFA4 OS=Mus musculus GN=Ndufa4 PE=1 SV=2	9.9	9326.81	3088.82	Q62425	4	46.34	0	NDUA4_MOUSE	204.914	158.158	219.019	156.389	44.8913	109.128	223.693	45.0645	201.053	207.958	145.231	189.055	148.75	168.676	-0.181584	0.30152	0.499436	0.351976
Uqcrc2	Cytochrome b-c1 complex subunit 2, mitochondrial OS=Mus musculus GN=Uqcrc2 PE=1 SV=1	9.57	48292	3631.52	Q9DB77	15	44.15	0	QCR2_MOUSE	1292.33	1156.66	1180.12	1256.25	1167.47	1306.28	1350.98	1246.04	1400.85	1256.58	1146.03	1194.02	1226.52	1265.75	-0.0437982	0.34761	0.449149	0.350358
Atp6v1g2	V-type proton ATPase subunit G 2 OS=Mus musculus GN=Atp6v1g2 PE=1 SV=1	10.67	13708.5	5241.01	Q9WTT4	6	55.08	0	VATG2_MOUSE	138.46	112.901	148.021	127.428	77.0513	103.505	105.633	79.8971	138.751	117.746	180.638	149.707	117.894	128.729	-0.110849	0.331646	0.465965	0.349681
Ndufb4	NADH dehydrogenase [ubiquinone] 1 beta subcomplex subunit 4 OS=Mus musculus GN=Ndufb4 PE=1 SV=3	10.16	15081.3	1002.75	Q9CQC7	4	37.98	0	NDUB4_MOUSE	47.365	50.1628	62.6506	74.7411	54.4831	73.7031	77.2254	75.0874	68.951	52.1763	66.0677	47.665	60.5176	64.5288	-0.0927145	0.336196	0.461109	0.348746
Pfkl	ATP-dependent 6-phosphofructokinase, liver type OS=Mus musculus GN=Pfkl PE=1 SV=4	6.75	86158.4	268.91	P12382	3	4.49	0	PFKAL_MOUSE	105.528	182.638	212.527	204.043	226.884	243.675	185.402	211.538	NA	216.976	199.374	205.873	195.882	203.833	-0.103595	0.331658	0.465953	0.347461
Prkcb	Protein kinase C beta type OS=Mus musculus GN=Prkcb PE=1 SV=4	6.57	77891.5	296.474	P68404	3	6.11	0	KPCB_MOUSE	NA	196.343	249.105	231.913	175.07	185.946	202.509	145.369	NA	263.432	262.21	254.502	207.675	225.605	-0.0974032	0.331646	0.465965	0.345654
Myo1d	Unconventional myosin-Id OS=Mus musculus GN=Myo1d PE=1 SV=1	9.7	116880	1590.62	Q5SYD0	51	54.17	0	MYO1D_MOUSE	7032.62	6568.25	8057.56	8454.53	6133.29	5442.79	6447.23	8229.1	7059.63	5325.83	6714.69	5657.25	6948.17	6572.29	0.0785354	0.336599	0.460682	0.345639
Ly6h	Lymphocyte antigen 6H OS=Mus musculus GN=Ly6h PE=1 SV=2	7.4	15296.4	683.219	Q9WUC3	3	18.71	0	LY6H_MOUSE	43.577	40.5892	56.9053	61.7147	41.2881	56.6494	52.1145	30.6322	46.447	41.1876	55.4473	58.4763	50.1206	47.3842	0.0921882	0.331646	0.465965	0.344221
Hist1h4a	Histone H4 OS=Mus musculus GN=Hist1h4a PE=1 SV=2	11.77	11367.4	1371.04	P62806	4	40.78	0	H4_MOUSE	67.9861	33.8145	50.1403	37.0734	19.9402	NA	39.0268	53.6074	37.7258	28.2823	26.3033	31.69	41.7909	36.1059	0.136714	0.313979	0.485312	0.342452
Idh3g	Isocitrate dehydrogenase [NAD] subunit gamma 1, mitochondrial OS=Mus musculus GN=Idh3g PE=1 SV=1	9.25	43184.7	299.391	P70404	4	13.23	0	IDHG1_MOUSE	NA	159.597	237.318	209.525	306.834	244.86	199.247	137.201	NA	313.88	208.413	223.88	231.627	216.524	0.114911	0.321382	0.47711	0.341307
Gdi1	Rab GDP dissociation inhibitor alpha OS=Mus musculus GN=Gdi1 PE=1 SV=3	4.76	51092	1837.38	P50396	18	55.03	0	GDIA_MOUSE	1256.06	1679.15	1835.88	1415.91	1190.86	1453.61	1115.45	648.581	2276.65	1705.31	955.524	2044.55	1471.91	1457.68	0.131733	0.313979	0.485312	0.340494
Dpysl5	Dihydropyrimidinase-related protein 5 OS=Mus musculus GN=Dpysl5 PE=1 SV=1	6.65	62086.8	784.562	Q9EQF6	16	52.13	0	DPYL5_MOUSE	560.507	653.446	413.861	477.788	668.735	693.922	599.943	598.367	413.198	485.289	622.636	539.852	578.043	543.214	0.0790064	0.331188	0.466457	0.340481
Ran	GTP-binding nuclear protein Ran OS=Mus musculus GN=Ran PE=1 SV=3	7.31	24594.2	1058.28	P62827	6	33.33	0	RAN_MOUSE	180.062	153.068	176.421	163.299	170.626	181.839	152.829	138	157.018	139.649	196.011	207.942	170.886	165.242	0.0643773	0.333638	0.463834	0.339792
Ap2a1	AP-2 complex subunit alpha-1 OS=Mus musculus GN=Ap2a1 PE=1 SV=1	6.63	108748	392.252	P17426	9	11.67	0	AP2A1_MOUSE	295.733	311.794	361.754	301.25	302.252	323.907	227.646	243.342	362.456	344.813	313.827	339.542	316.115	305.271	0.0692054	0.331872	0.465724	0.339011
Ndufs8	NADH dehydrogenase [ubiquinone] iron-sulfur protein 8, mitochondrial OS=Mus musculus GN=Ndufs8 PE=1 SV=1	5.83	24494.6	392.743	Q8K3J1	3	13.68	0	NDUS8_MOUSE	144.429	134.381	153.645	152.79	178.005	151.42	207.129	132.133	179.45	136.704	148.009	161.205	152.445	160.772	-0.063902	0.331658	0.465953	0.337758
Atp5b	ATP synthase subunit beta, mitochondrial OS=Mus musculus GN=Atp5b PE=1 SV=2	5.03	56300.6	11979.9	P56480	23	64.46	0	ATPB_MOUSE	7495.88	7082.43	6121.94	7330.7	7773.15	6222.28	7779.06	7403.34	7926.61	6546.71	7464.29	6368.79	7004.39	7248.13	-0.0503417	0.333638	0.463834	0.337414
Sccpdh	Saccharopine dehydrogenase-like oxidoreductase OS=Mus musculus GN=Sccpdh PE=1 SV=1	8.67	47699.7	365.861	Q8R127	3	7.69	0	SCPDL_MOUSE	150.182	152.929	175.583	143.684	183.289	151.522	130.448	144.125	190.469	153.787	149.462	156.009	159.531	154.05	0.0542637	0.331658	0.465953	0.336068
Ckmt1	Creatine kinase U-type, mitochondrial OS=Mus musculus GN=Ckmt1 PE=1 SV=1	8.16	47403	3237.93	P30275	17	54.07	0	KCRU_MOUSE	1268.79	1274.18	1248.33	1228.04	1424.7	1445	1212.7	1372.98	1135.71	1438.73	1354.32	1148.5	1314.84	1277.16	0.0449769	0.331658	0.465953	0.334694
Phb2	Prohibitin-2 OS=Mus musculus GN=Phb2 PE=1 SV=1	10.19	33296.4	1165.96	O35129	12	45.15	0	PHB2_MOUSE	221.366	219.873	240.638	217.253	226.999	244.102	239.499	274.691	238.342	226.3	227.991	207.665	228.372	235.748	-0.0421361	0.331872	0.465724	0.334536
Ca2	Carbonic anhydrase 2 OS=Mus musculus GN=Ca2 PE=1 SV=4	6.53	29146.6	15325.4	P00920	13	73.46	0	CAH2_MOUSE	2318.84	2354.81	2668.61	2542.11	2606.42	2471.87	2374.89	2392.91	2486.46	2538.55	2925.75	2674.2	2493.78	2565.46	-0.038973	0.331658	0.465953	0.33394
Stx1b	Syntaxin-1B OS=Mus musculus GN=Stx1b PE=1 SV=1	5.09	33472.9	5309.45	P61264	13	55.21	0	STX1B_MOUSE	1110.32	1082.15	1151.2	1175.49	969.251	991.941	1138.25	1092.24	1244.69	1134.27	1075.81	982.286	1080.06	1111.26	-0.041125	0.331188	0.466457	0.333732
Llgl1	Lethal(2) giant larvae protein homolog 1 OS=Mus musculus GN=Llgl1 PE=1 SV=1	6.02	113873	195.423	Q80Y17	4	4.05	0	L2GL1_MOUSE	328.226	370.699	309.606	305.594	326.98	558.57	506.8	339.312	NA	307.961	283.838	282.386	366.612	344.059	0.0937508	0.318203	0.480614	0.331727
Aldh1a1	Retinal dehydrogenase 1 OS=Mus musculus GN=Aldh1a1 PE=1 SV=5	7.7	55095.2	1251.62	P24549	16	38.92	0	AL1A1_MOUSE	550.751	482.881	678.776	633.492	716.862	666.726	475.257	471.013	794.322	752.359	552.7	537.618	621.581	597.211	0.0765706	0.321382	0.47711	0.330377
Pfkm	ATP-dependent 6-phosphofructokinase, muscle type OS=Mus musculus GN=Pfkm PE=1 SV=3	7.9	86124.2	400.36	P47857	12	20.13	0	PFKAM_MOUSE	500.359	498.43	570.695	509.23	667.062	673.575	452.746	502.494	579.701	605.553	579.649	558.837	569.892	546.497	0.0553455	0.32336	0.474941	0.328062
Ndufv2	NADH dehydrogenase [ubiquinone] flavoprotein 2, mitochondrial OS=Mus musculus GN=Ndufv2 PE=1 SV=2	7.17	27627.6	415.784	Q9D6J6	3	20.16	0	NDUV2_MOUSE	109.593	114.483	93.5982	158.245	69.9878	126.016	144.604	64.3275	159.774	137.688	138.899	91.255	111.987	122.758	-0.110378	0.307977	0.492065	0.327159
Cyb5b	Cytochrome b5 type B OS=Mus musculus GN=Cyb5b PE=1 SV=1	4.6	16375.1	788.843	Q9CQX2	4	50.68	0	CYB5B_MOUSE	100.135	103.313	91.8133	120.939	121.807	109.369	136.169	102.585	121.528	119.251	103.624	91.5041	107.896	112.443	-0.0544907	0.321382	0.47711	0.325968
Slc25a12	Calcium-binding mitochondrial carrier protein Aralar1 OS=Mus musculus GN=Slc25a12 PE=1 SV=1	8.29	74968.9	966.386	Q8BH59	20	41.65	0	CMC1_MOUSE	1050.74	974.819	955.752	948.136	994.402	891.926	1131.06	859.087	1081.61	982.003	940.971	997.098	969.296	998.637	-0.0390287	0.321382	0.47711	0.323743
Syn1	Synapsin-1 OS=Mus musculus GN=Syn1 PE=1 SV=2	10.15	74268.5	809.368	O88935	13	30.03	0	SYN1_MOUSE	564.169	576.462	645.367	674.609	542.751	663.257	551.022	595.761	668.445	597.917	593.598	555.851	611.102	593.766	0.0392665	0.321314	0.477184	0.323704
Cox7a2	Cytochrome c oxidase subunit 7A2, mitochondrial OS=Mus musculus GN=Cox7a2 PE=1 SV=2	10.66	9290.91	1691.25	P48771	2	27.71	0	CX7A2_MOUSE	127.95	73.9878	133.548	76.0002	45.2813	66.5211	133.588	39.4419	103.014	111.079	71.2388	109.255	87.2147	94.6026	-0.1162	0.300623	0.500468	0.322299
Bcas1	Breast carcinoma-amplified sequence 1 homolog OS=Mus musculus GN=Bcas1 PE=1 SV=3	5.82	67833.8	3216.33	Q80YN3	14	24.01	0	BCAS1_MOUSE	3321.89	3614.03	3607.58	3344.62	3353.06	3062.73	3898.66	3825.46	2667.34	3234.09	3444.63	4128.5	3383.98	3533.11	-0.04976	0.315812	0.483268	0.319708
Dstn	Destrin OS=Mus musculus GN=Dstn PE=1 SV=3	7.99	18863.8	1065.17	Q9R0P5	5	32.12	0	DEST_MOUSE	73.4239	84.7146	91.9066	78.3808	61.2756	97.9603	77.6868	41.351	98.6413	105.201	100.206	121.704	81.277	90.7983	-0.0993371	0.302553	0.498249	0.318444
Des	Desmin OS=Mus musculus GN=Des PE=1 SV=3	5.03	53554.9	798.058	P31001	4	6.18	0	DESM_MOUSE	559.039	540.303	693.845	686.899	635.802	840.997	474.64	593.648	1061.84	683.889	728.61	713.656	659.481	709.38	-0.0778275	0.307684	0.492397	0.317375
Hspa12a	Heat shock 70 kDa protein 12A OS=Mus musculus GN=Hspa12a PE=1 SV=1	6.32	75213.7	373.353	Q8K0U4	7	13.19	0	HS12A_MOUSE	379.922	337.333	364.977	357.421	205.75	243.773	367.975	425.805	329.361	266.166	202.998	203.692	314.863	299.333	0.0936814	0.302553	0.498249	0.316725
Gna11	Guanine nucleotide-binding protein subunit alpha-11 OS=Mus musculus GN=Gna11 PE=1 SV=1	5.6	42309.4	545.018	P21278	9	27.86	0	GNA11_MOUSE	158.121	152.809	160.825	141.82	142.959	120.201	149.881	143.973	131.599	145.49	135.906	144.543	146.122	141.898	0.0370963	0.313453	0.4859	0.315641
Map6d1	MAP6 domain-containing protein 1 OS=Mus musculus GN=Map6d1 PE=1 SV=1	10.14	20660.8	598.699	Q14BB9	3	37.7	0	MA6D1_MOUSE	73.1545	36.3777	55.455	42.5262	62.5589	74.8458	NA	42.5762	85.564	51.2033	46.293	44.8563	57.4864	54.0986	0.089923	0.301012	0.500021	0.314156
Prnp	Major prion protein OS=Mus musculus GN=Prnp PE=1 SV=2	9.55	28148.6	2280.1	P04925	4	16.54	0	PRIO_MOUSE	170.073	394.664	404.157	378.53	395.121	409.026	357.894	399.399	213.289	486.06	412.799	394.179	358.595	377.27	-0.0898353	0.301012	0.500021	0.314131
Rab5b	Ras-related protein Rab-5B OS=Mus musculus GN=Rab5b PE=1 SV=1	8.24	23935	1101.54	P61021	6	36.74	0	RAB5B_MOUSE	65.067	74.2722	80.6132	66.4871	67.1142	67.5797	58.6852	73.6995	60.1032	84.5598	74.2218	88.7055	70.1889	73.3292	-0.0501477	0.307411	0.492707	0.311475
Fscn1	Fascin OS=Mus musculus GN=Fscn1 PE=1 SV=4	6.45	55249.4	2935.07	Q61553	17	45.84	0	FSCN1_MOUSE	847.612	1288.08	1175.32	1161.06	1171.55	1025.39	1174.99	1052.36	667.871	1024.46	1266.31	1280.78	1111.5	1077.8	0.0638912	0.30152	0.499436	0.308215
Actr3	Actin-related protein 3 OS=Mus musculus GN=Actr3 PE=1 SV=3	5.51	47813.4	265.058	Q99JY9	2	9.81	0	ARP3_MOUSE	86.1229	94.805	100.093	103.462	125.129	NA	NA	84.8416	NA	117.902	105.859	83.8946	101.922	98.1244	0.0589652	0.30152	0.499436	0.307232
Slc3a2	4F2 cell-surface antigen heavy chain OS=Mus musculus GN=Slc3a2 PE=1 SV=1	5.52	58450.7	417.137	P10852	6	15.4	0	4F2_MOUSE	255.882	242.15	335.198	293.626	217.965	207.106	218.271	259.786	356.747	266.313	271.136	240.172	258.655	268.738	-0.0582853	0.30152	0.499436	0.307102
Cacybp	Calcyclin-binding protein OS=Mus musculus GN=Cacybp PE=1 SV=1	8.12	26624.3	402.243	Q9CXW3	2	12.66	0	CYBP_MOUSE	48.1727	NA	59.7323	60.463	50.7005	NA	NA	50.6572	NA	NA	54.1102	NA	54.7671	52.3837	0.0578612	0.301012	0.500021	0.306522
Endod1	Endonuclease domain-containing 1 protein OS=Mus musculus GN=Endod1 PE=1 SV=2	5.74	55946.6	705.695	Q8C522	9	25.35	0	ENDD1_MOUSE	442.133	616.841	613.194	645.152	610.821	615.537	600.708	615.133	447.293	701.35	677.664	641.207	590.613	613.892	-0.0520528	0.301799	0.499115	0.306255
Qdpr	Dihydropteridine reductase OS=Mus musculus GN=Qdpr PE=1 SV=2	7.88	25798.4	6138.49	Q8BVI4	12	65.56	0	DHPR_MOUSE	540.754	650.109	682.528	691.189	927.04	799.792	665.121	682.611	848.002	885.975	725.063	620.933	715.235	737.951	-0.0534467	0.30152	0.499436	0.306221
Ppp1cb	Serine/threonine-protein phosphatase PP1-beta catalytic subunit OS=Mus musculus GN=Ppp1cb PE=1 SV=3	5.77	37985.3	455.417	P62141	3	12.84	0	PP1B_MOUSE	NA	93.4146	124.061	87.1001	111.834	NA	NA	NA	NA	105.308	85.5437	107.833	104.102	99.5617	0.0576686	0.300623	0.500468	0.306105
Rac1	Ras-related C3 botulinum toxin substrate 1 OS=Mus musculus GN=Rac1 PE=1 SV=1	8.57	21849.3	8106.64	P63001	8	43.75	0	RAC1_MOUSE	771.344	999.15	1147.91	949.17	785.869	829.196	1019.4	853.051	631.627	1066.51	1054.45	1115.37	913.773	956.736	-0.055396	0.301012	0.500021	0.306067
Cldn11	Claudin-11 OS=Mus musculus GN=Cldn11 PE=1 SV=1	7.81	22855.7	7097.48	Q60771	3	14.49	0	CLD11_MOUSE	8602.7	8244.36	6323.56	6993.44	6858.29	5141.7	8103.13	7623.28	7726.83	8589.36	6269.79	5401.71	7027.34	7285.68	-0.0546874	0.301012	0.500021	0.305939
Glud1	Glutamate dehydrogenase 1, mitochondrial OS=Mus musculus GN=Glud1 PE=1 SV=1	7.98	61679.1	470.531	P26443	9	21.51	0	DHE3_MOUSE	191.074	206.901	230.06	218.399	288.228	310.543	236.838	251.755	271.011	258.77	240.827	216.713	240.867	245.986	-0.0492799	0.30152	0.499436	0.305521
Ndufa12	NADH dehydrogenase [ubiquinone] 1 alpha subcomplex subunit 12 OS=Mus musculus GN=Ndufa12 PE=1 SV=2	9.67	17143.5	956.188	Q7TMF3	4	40	0	NDUAC_MOUSE	58.0275	37.4484	48.8954	41.5278	48.0888	49.926	50.9863	35.9415	NA	42.6685	44.9474	54.164	47.319	45.7415	0.0495836	0.301012	0.500021	0.305068
Adam23	Disintegrin and metalloproteinase domain-containing protein 23 OS=Mus musculus GN=Adam23 PE=1 SV=1	7.49	94171	889.729	Q9R1V7	9	13.63	0	ADA23_MOUSE	1127.61	1119.19	1268.16	1186.69	1179.35	1083.02	1149.41	1238.55	922.934	1079.44	1250.15	1179.54	1160.67	1136.67	0.0356687	0.302553	0.498249	0.304649
Padi2	Protein-arginine deiminase type-2 OS=Mus musculus GN=Padi2 PE=1 SV=2	5.21	76991.1	355.355	Q08642	7	14.12	0	PADI2_MOUSE	456.176	489.056	566.516	496.815	493.984	468.203	411.186	564.294	408.503	506.996	611.26	593.641	495.125	515.98	-0.0439867	0.301012	0.500021	0.304209
Cyc1	Cytochrome c1, heme protein, mitochondrial OS=Mus musculus GN=Cyc1 PE=1 SV=1	9.37	35555.8	1165.22	Q9D0M3	5	25.54	0	CY1_MOUSE	315.12	411.878	397.208	440.567	419.213	417.118	419.058	439.536	347.194	455.115	427.665	375.551	400.184	410.687	-0.0391811	0.30152	0.499436	0.304056
Got2	Aspartate aminotransferase, mitochondrial OS=Mus musculus GN=Got2 PE=1 SV=1	9.26	47810.7	12756.9	P05202	24	65.58	0	AATM_MOUSE	5516.02	5110.21	5583.49	5856.79	4575.39	4040.23	5057.95	5284.75	4703.42	4480.67	5653.06	6340.83	5113.69	5253.45	-0.0408156	0.301012	0.500021	0.303766
Dusp15	Dual specificity protein phosphatase 15 OS=Mus musculus GN=Dusp15 PE=2 SV=3	9.57	26642.5	1145.63	Q8R4V2	7	44.68	0	DUS15_MOUSE	217.386	213.454	197.186	176.387	198.758	180.736	213.333	191.683	193.833	197.563	212.769	197.201	197.318	201.064	-0.0300896	0.301799	0.499115	0.303296
Mapt	Microtubule-associated protein tau OS=Mus musculus GN=Mapt PE=1 SV=3	6.32	76585.7	626.928	P10637	12	24.83	0	TAU_MOUSE	1282.79	1108.55	1159.39	1152.63	1255.41	1180.07	992.365	1111.91	1469.75	1216.68	1204.52	1015.91	1189.81	1168.52	0.0369228	0.301012	0.500021	0.303268
Prkcg	Protein kinase C gamma type OS=Mus musculus GN=Prkcg PE=1 SV=1	7.17	79612.4	830.537	P63318	17	34	0	KPCG_MOUSE	625.107	617.823	590.784	667.963	503.673	485.108	558.638	607.209	638.98	572.584	641.021	541.01	581.743	593.241	-0.0348175	0.301012	0.500021	0.303019
Pafah1b1	Platelet-activating factor acetylhydrolase IB subunit alpha OS=Mus musculus GN=Pafah1b1 PE=1 SV=2	7.01	47240.4	386.756	P63005	6	19.02	0	LIS1_MOUSE	187.829	219.898	209.786	230.494	218.466	219.48	186.46	188.265	263.316	230.328	221.572	234.349	214.325	220.715	-0.034526	0.301012	0.500021	0.302985
Prdx1	Peroxiredoxin-1 OS=Mus musculus GN=Prdx1 PE=1 SV=1	8.23	22404.6	6015.98	P35700	13	67.34	0	PRDX1_MOUSE	980.889	1117.41	892.456	970.798	827.984	875.453	964.882	904.743	1069.77	839.529	871.703	881.946	944.164	922.096	0.0319253	0.301012	0.500021	0.3027
Sept2	Septin-2 OS=Mus musculus GN=Sept2 PE=1 SV=2	6.09	41753.7	1803.66	P42208	12	53.19	0	SEPT2_MOUSE	450.457	436.103	485.046	495.588	564.101	473.24	470.72	480.894	452.152	478.654	603.59	486.61	484.089	495.437	-0.0318118	0.301012	0.500021	0.302688
Dlat	Dihydrolipoyllysine-residue acetyltransferase component of pyruvate dehydrogenase complex, mitochondrial OS=Mus musculus GN=Dlat PE=1 SV=2	8.67	68512.1	554.382	Q8BMF4	10	21.18	0	ODP2_MOUSE	454.751	414.061	426.471	443.385	488.52	464.353	468.729	476.03	452.016	364.019	456.994	424.564	448.59	440.392	0.0302028	0.301012	0.500021	0.302523
Nme2	Nucleoside diphosphate kinase B OS=Mus musculus GN=Nme2 PE=1 SV=1	7.37	17477.2	14389.5	Q01768	12	79.61	0	NDKB_MOUSE	2768.32	2505.09	2423.02	2904.6	1130.29	1854.02	2907.11	1449.3	2576.46	2400.96	2537.85	2111.38	2264.22	2330.51	-0.0748927	0.290654	0.51209	0.300148
Mog	Myelin-oligodendrocyte glycoprotein OS=Mus musculus GN=Mog PE=1 SV=1	7.92	28670.2	20298	Q61885	12	46.75	0	MOG_MOUSE	11793.7	16451.7	14931.2	16096.5	15956.4	10916.1	15276.3	15074	8451.96	15324	15861.5	13725.9	14357.6	13952.3	0.0538297	0.290654	0.51209	0.295596
Cycs	Cytochrome c, somatic OS=Mus musculus GN=Cycs PE=1 SV=2	10	11719.5	16518.5	P62897	7	60.95	0	CYC_MOUSE	1022.64	776.01	718.612	677.965	214.068	588.743	871.215	239.963	803.185	713.622	711.251	887.168	666.34	704.401	-0.105645	0.275801	0.529906	0.295342
Vamp3	Vesicle-associated membrane protein 3 OS=Mus musculus GN=Vamp3 PE=1 SV=1	8.92	11594.3	2448.92	P63024	4	56.31	0	VAMP3_MOUSE	88.0557	90.5879	81.0255	116.482	76.8459	94.3456	90.4032	91.8136	107.501	68.162	100.086	75.1099	91.2238	88.8459	0.0425954	0.290654	0.51209	0.293758
Mtatp8	ATP synthase protein 8 OS=Mus musculus GN=Mtatp8 PE=1 SV=1	10.35	7766.3	2629.22	P03930	2	23.88	0	ATP8_MOUSE	152.339	119.07	160.243	135.793	126.452	102.336	127.498	152.167	134.26	144.085	117.269	134.942	132.705	135.037	-0.0362647	0.290654	0.51209	0.292907
Nme1	Nucleoside diphosphate kinase A OS=Mus musculus GN=Nme1 PE=1 SV=1	7.26	17321.9	20225.7	P15532	16	86.18	0	NDKA_MOUSE	3478.12	3132.9	3052.72	3252.8	1379.11	2277.38	3581.9	1808.47	3119.93	2877.49	3126.44	2490.73	2762.17	2834.16	-0.0690347	0.283864	0.520159	0.292138
Ndufs1	NADH-ubiquinone oxidoreductase 75 kDa subunit, mitochondrial OS=Mus musculus GN=Ndufs1 PE=1 SV=2	5.37	80803.5	1103.41	Q91VD9	22	39.75	0	NDUS1_MOUSE	881.41	870.47	814.703	977.206	890.039	847.18	939.613	1073.18	935.364	793.046	910.69	761	880.168	902.149	-0.0284323	0.290654	0.51209	0.292041
Ywhaz	14-3-3 protein zeta/delta OS=Mus musculus GN=Ywhaz PE=1 SV=1	4.53	27942.3	2224.91	P63101	13	53.88	0	1433Z_MOUSE	282.135	338.086	355.071	337.64	343.931	343.893	370.31	292.976	372.507	356.342	341.643	307.322	333.459	340.183	-0.026806	0.290654	0.51209	0.291887
Dync1h1	Cytoplasmic dynein 1 heavy chain 1 OS=Mus musculus GN=Dync1h1 PE=1 SV=2	5.98	534784	219.75	Q9JHU4	32	8.48	0	DYHC1_MOUSE	27084.7	18829.3	22229	20660.5	15049.3	21736.2	19932.3	20215.5	18797.2	21769.2	19048.2	21091.3	20931.5	20142.3	0.0349819	0.283553	0.520532	0.285702
Gnb2	Guanine nucleotide-binding protein G(I)/G(S)/G(T) subunit beta-2 OS=Mus musculus GN=Gnb2 PE=1 SV=3	5.54	38072.5	10019.4	P62880	11	53.82	0	GBB2_MOUSE	1495.38	2039.76	2042.51	2009.1	1658.77	1848.28	1819.28	1855.62	1152.75	1893.01	2010.23	2175.92	1848.97	1817.8	0.0420135	0.281925	0.522486	0.285038
Csrp1	Cysteine and glycine-rich protein 1 OS=Mus musculus GN=Csrp1 PE=1 SV=3	8.55	21438.8	6862.96	P97315	9	60.62	0	CSRP1_MOUSE	340.373	753.203	637.722	673.476	459.191	717.621	766.712	421.911	377.511	785.641	648.291	746.601	596.931	624.445	-0.059328	0.273511	0.532708	0.279872
Cfl2	Cofilin-2 OS=Mus musculus GN=Cfl2 PE=1 SV=1	8.16	18823.7	2272.92	P45591	5	34.94	0	COF2_MOUSE	53.3354	67.4539	60.3215	63.5911	41.4919	38.5715	70.292	44.0275	44.0501	41.2222	74.1302	65.6023	54.1275	56.554	-0.0512139	0.274483	0.531517	0.27922
Echs1	Enoyl-CoA hydratase, mitochondrial OS=Mus musculus GN=Echs1 PE=1 SV=1	8.58	31873.6	672.628	Q8BH95	4	19.31	0	ECHM_MOUSE	107.265	107.666	94.8082	135.537	110.664	118.612	118.093	121.068	151.13	89.795	101.707	84.4442	112.425	111.04	0.0375357	0.275801	0.529906	0.278343
Ezr	Ezrin OS=Mus musculus GN=Ezr PE=1 SV=3	5.73	69521	469.354	P26040	9	17.06	0	EZRI_MOUSE	98.402	86.5338	46.857	48.1672	202.373	183.028	42.8382	69.9649	109.05	87.1629	136.667	127.744	110.894	95.5711	0.0862119	0.264401	0.544	0.278102
Usmg5	Up-regulated during skeletal muscle growth protein 5 OS=Mus musculus GN=Usmg5 PE=1 SV=1	10.16	6438.56	2666.12	Q78IK2	2	43.1	0	USMG5_MOUSE	47.6023	50.8442	59.8498	82.2439	67.3892	47.6897	61.7816	46.1599	62.3653	74.0229	57.146	59.7289	59.2698	60.2008	-0.0385084	0.274314	0.531724	0.277004
Aldoc	Fructose-bisphosphate aldolase C OS=Mus musculus GN=Aldoc PE=1 SV=4	6.74	39794.1	1085.96	P05063	9	36.36	0	ALDOC_MOUSE	137.475	148.776	158.512	195.996	221.574	244.673	167.433	164.269	211.681	200.414	174.783	144.094	184.501	177.112	0.0382134	0.274314	0.531724	0.276963
Ppp2r1a	Serine/threonine-protein phosphatase 2A 65 kDa regulatory subunit A alpha isoform OS=Mus musculus GN=Ppp2r1a PE=1 SV=3	4.81	66121.1	223.72	Q76MZ3	3	6.96	0	2AAA_MOUSE	291.752	264.438	259.072	245.243	296.202	389.927	273.066	293.614	404.369	281.896	265.137	268.084	291.106	297.694	-0.0330672	0.274314	0.531724	0.2763
Fabp5	Fatty acid-binding protein, epidermal OS=Mus musculus GN=Fabp5 PE=1 SV=3	6.14	15479.6	747.471	Q05816	4	39.26	0	FABP5_MOUSE	64.9665	68.4701	78.8619	34.801	NA	99.0336	78.6867	NA	64.7984	82.1916	39.3535	58.7003	69.2266	64.7461	0.0641234	0.268309	0.539127	0.275865
Nfasc	Neurofascin OS=Mus musculus GN=Nfasc PE=1 SV=1	5.77	138774	1092.76	Q810U3	24	28.63	0	NFASC_MOUSE	3384.31	3183.6	3470.58	3434.2	2969.35	2695.3	3014.71	3304.3	2954.18	3131.91	3142.93	3277.4	3189.56	3137.57	0.0190737	0.274314	0.531724	0.274976
Slc1a2	Excitatory amino acid transporter 2 OS=Mus musculus GN=Slc1a2 PE=1 SV=1	6.24	62543.6	2213.48	P43006	9	20.8	0	EAA2_MOUSE	1466.99	1378.82	1874.82	1583.06	1361.84	1345.9	1685.17	1701.03	1514.46	1506.43	1255.45	1192.14	1501.91	1475.78	0.0281485	0.273511	0.532708	0.274956
Vcp	Transitional endoplasmic reticulum ATPase OS=Mus musculus GN=Vcp PE=1 SV=4	4.95	90006.3	488.047	Q01853	13	23.45	0	TERA_MOUSE	311.087	265.018	290.977	320.07	337.344	394.952	279.286	280.409	431.248	308.788	348.205	317.409	319.908	327.558	-0.0286825	0.270623	0.536262	0.272138
Gpi	Glucose-6-phosphate isomerase OS=Mus musculus GN=Gpi PE=1 SV=4	8.2	62995.1	4165.4	P06745	23	49.28	0	G6PI_MOUSE	2076.98	2017.74	1922.48	1991.01	2508.57	2597.63	2057.75	1769.58	2210.69	2923.31	2112.16	2334.98	2185.73	2234.74	-0.0251571	0.264401	0.544	0.265595
Dlg1	Disks large homolog 1 OS=Mus musculus GN=Dlg1 PE=1 SV=1	5.43	100519	229.751	Q811D0	3	6.85	0	DLG1_MOUSE	325.163	291.359	325.017	263.776	292.077	368.887	341.159	297.173	287.664	302.83	320.751	286.982	311.047	306.093	0.0177115	0.264401	0.544	0.264994
Pgk1	Phosphoglycerate kinase 1 OS=Mus musculus GN=Pgk1 PE=1 SV=4	7.9	44949.8	1363.63	P09411	11	36.45	0	PGK1_MOUSE	433.564	448.07	509.192	524.213	535.772	562.899	533.547	452.689	510.743	464.968	531.111	478.339	502.285	495.233	0.0169858	0.264401	0.544	0.264946
Gpd1	Glycerol-3-phosphate dehydrogenase [NAD(+)], cytoplasmic OS=Mus musculus GN=Gpd1 PE=1 SV=3	6.8	38200.1	343.901	P13707	3	12.32	0	GPDA_MOUSE	133.623	129.484	157.402	150.156	136.01	133.826	120.746	126.311	143.498	146.799	164.877	151.189	140.084	142.237	-0.0176067	0.263282	0.545403	0.26387
Dynll1	Dynein light chain 1, cytoplasmic OS=Mus musculus GN=Dynll1 PE=1 SV=1	7.23	10537	8241.55	P63168	3	49.44	0	DYL1_MOUSE	61.806	173.037	212.495	187.42	113.283	143.917	146.85	121.521	57.4554	214.954	169.819	144.562	148.66	142.527	0.059999	0.255136	0.55573	0.262096
Got1	Aspartate aminotransferase, cytoplasmic OS=Mus musculus GN=Got1 PE=1 SV=3	6.76	46532.8	493.803	P05201	8	29.54	0	AATC_MOUSE	143.447	447.178	592.522	479.86	641.096	514.022	302.031	443.538	206.54	600.567	497.002	576.845	469.687	437.754	0.055881	0.25203	0.559719	0.258151
Rab14	Ras-related protein Rab-14 OS=Mus musculus GN=Rab14 PE=1 SV=3	5.8	24125.1	2043.38	Q91V41	10	60.47	0	RAB14_MOUSE	141.205	10988.2	9721.4	11407.3	12535.2	6182.96	7114.6	9599.19	171.059	11354.9	12425.3	11956	8496.04	8770.16	-0.0938938	0.238686	0.577183	0.25649
Atp5c1	ATP synthase subunit gamma, mitochondrial OS=Mus musculus GN=Atp5c1 PE=1 SV=1	9.36	33000	818.983	Q91VR2	10	34.56	0	ATPG_MOUSE	477.758	326.375	373.34	367.926	391.218	390.332	390.079	475.7	382.56	345.879	347.714	355.663	387.825	382.932	0.0178681	0.254943	0.555978	0.255568
Uqcrb	Cytochrome b-c1 complex subunit 7 OS=Mus musculus GN=Uqcrb PE=1 SV=3	9.51	13527.5	1079.86	Q9D855	4	32.43	0	QCR7_MOUSE	110.874	116.416	125.525	102.888	74.8652	171.049	145.628	55.4503	133.759	133.932	110.573	115.002	116.936	115.724	0.0357801	0.25203	0.559719	0.254557
Opalin	Opalin OS=Mus musculus GN=Opalin PE=1 SV=1	4.64	15947	1837.41	Q7M750	3	38.46	0	OPALI_MOUSE	358.637	121.466	122.051	130.156	116.229	202.879	185.567	123.293	474.182	155.184	110.631	108.476	175.236	192.889	-0.0513661	0.249282	0.563271	0.254519
Stxbp6	Syntaxin-binding protein 6 OS=Mus musculus GN=Stxbp6 PE=1 SV=1	9.57	23956.2	462.399	Q8R3T5	3	18.57	0	STXB6_MOUSE	68.0655	74.186	76.9907	71.4952	76.9664	92.572	77.6814	73.7529	87.1444	60.9827	80.9963	75.0677	76.7126	75.9376	0.0162129	0.253588	0.557715	0.254106
Cox4i1	Cytochrome c oxidase subunit 4 isoform 1, mitochondrial OS=Mus musculus GN=Cox4i1 PE=1 SV=2	9.59	19587.5	5563.93	P19783	8	48.52	0	COX41_MOUSE	589.841	597.405	665.419	577.948	598.158	568.587	691.236	620.237	487.418	655.411	578.514	616.491	599.56	608.218	-0.0139736	0.253514	0.557809	0.253899
Gstp1	Glutathione S-transferase P 1 OS=Mus musculus GN=Gstp1 PE=1 SV=2	7.96	23780.3	4284.54	P19157	7	50	0	GSTP1_MOUSE	539.677	473.097	551.314	612.965	502.754	579.595	397.285	506.382	785.723	597.08	603.646	481.464	543.234	561.93	-0.0209444	0.25203	0.559719	0.252899
Jam3	Junctional adhesion molecule C OS=Mus musculus GN=Jam3 PE=1 SV=2	6.64	35407.9	1168.6	Q9D8B7	11	42.26	0	JAM3_MOUSE	425.952	431.078	405.358	399.613	443.955	441.757	374.161	366.977	464.651	476.074	411.484	443.752	424.619	422.85	0.0121388	0.25203	0.559719	0.252322
Adam22	Disintegrin and metalloproteinase domain-containing protein 22 OS=Mus musculus GN=Adam22 PE=1 SV=2	7.66	102395	493.542	Q9R1V6	10	15.38	0	ADA22_MOUSE	659.362	631.284	683.554	620.202	661.728	670.502	630.966	586.763	612.272	714.555	715.589	703.792	654.439	660.656	-0.00986768	0.250628	0.561529	0.250822
Pllp	Plasmolipin OS=Mus musculus GN=Pllp PE=1 SV=1	9.57	19915.6	2371.47	Q9DCU2	3	25.82	0	PLLP_MOUSE	1136.27	788.784	763	652.65	815.971	942.119	840.725	672.189	819.032	976.295	730.085	969.399	849.799	834.621	0.0168987	0.247144	0.566051	0.247721
Lgi1	Leucine-rich glioma-inactivated protein 1 OS=Mus musculus GN=Lgi1 PE=1 SV=1	7.95	64385.2	184.694	Q9JIA1	2	3.95	0	LGI1_MOUSE	163.658	153.451	202.072	148.613	217.846	189.377	189.605	147.849	207.534	157.283	159.542	200.138	179.17	176.992	0.0151155	0.247144	0.566051	0.247606
Bdh1	D-beta-hydroxybutyrate dehydrogenase, mitochondrial OS=Mus musculus GN=Bdh1 PE=1 SV=2	9.25	38641.3	361.757	Q80XN0	5	17.2	0	BDH_MOUSE	171.117	145.163	176.033	149.855	152.44	207.024	152.791	153.112	198.367	172.84	155.387	174.524	166.939	167.837	-0.0121535	0.246884	0.566391	0.247182
Cox6a1	Cytochrome c oxidase subunit 6A1, mitochondrial OS=Mus musculus GN=Cox6a1 PE=1 SV=2	10.29	12352.2	1549.99	P43024	2	40.54	0	CX6A1_MOUSE	273.048	222.87	452.85	194.333	39.9779	102.981	390.197	26.7069	151.658	229.328	230.695	327.531	214.343	226.02	-0.0521298	0.238686	0.577183	0.244313
Fh	Fumarate hydratase, mitochondrial OS=Mus musculus GN=Fh PE=1 SV=3	9.38	54585	437.727	P97807	9	24.06	0	FUMH_MOUSE	240.466	925.485	1044.36	828.783	815.924	793.37	791.549	810.861	373.176	951.934	767.973	811.437	774.732	751.155	-0.0313951	0.238686	0.577183	0.240742
Ppia	Peptidyl-prolyl cis-trans isomerase A OS=Mus musculus GN=Ppia PE=1 SV=2	8	18142.5	15339.9	P17742	9	64.63	0	PPIA_MOUSE	505.454	1040.17	1003.52	1159.98	223.968	1043.18	1258.11	195.373	551.564	957.895	1205.04	1036.13	829.379	867.352	-0.030232	0.237483	0.578784	0.2394
Prdx2	Peroxiredoxin-2 OS=Mus musculus GN=Prdx2 PE=1 SV=3	5.04	21949.8	1924.85	Q61171	8	55.56	0	PRDX2_MOUSE	265.039	355.11	294.179	318.856	184.412	315.854	338.181	148.265	249.36	327.98	367.94	316.035	288.908	291.294	0.0181475	0.238686	0.577183	0.239375
Cfl1	Cofilin-1 OS=Mus musculus GN=Cfl1 PE=1 SV=3	8.22	18787.7	8771.69	P18760	11	65.06	0	COF1_MOUSE	508.597	570.836	494.629	527.057	366.818	508.602	561.886	360.046	365.496	515.578	606.71	576.061	496.09	497.629	0.0139623	0.238686	0.577183	0.239094
Cd47	Leukocyte surface antigen CD47 OS=Mus musculus GN=Cd47 PE=1 SV=2	8.7	33610.8	881.548	Q61735	4	14.19	0	CD47_MOUSE	680.178	665.208	667.746	569.635	592.722	484.774	528.489	751.765	605.202	550.53	657.138	590.705	610.044	613.971	-0.00921713	0.238686	0.577183	0.238864
Ctbp1	C-terminal-binding protein 1 OS=Mus musculus GN=Ctbp1 PE=1 SV=2	6.29	48200.8	573.066	O88712	6	19.5	0	CTBP1_MOUSE	180.035	206.816	233.084	246.261	163.366	205.48	238.662	209.486	185.128	171.797	220.056	212.054	205.84	206.197	-0.00809897	0.238686	0.577183	0.238824
Rab31	Ras-related protein Rab-31 OS=Mus musculus GN=Rab31 PE=1 SV=1	7.17	21673.7	503.1	Q921E2	3	22.16	0	RAB31_MOUSE	86.7029	66.4934	68.7946	67.3719	70.7635	72.6283	58.1755	63.5802	83.0234	76.1612	72.8554	83.2534	72.1258	72.8415	-0.00780619	0.238686	0.577183	0.238814
Atp5j2	ATP synthase subunit f, mitochondrial OS=Mus musculus GN=Atp5j2 PE=1 SV=3	10.23	10401.3	4773.51	P56135	2	26.14	0	ATPK_MOUSE	202.919	187.488	217.326	195.241	192.318	186.849	194.164	179.888	168.817	209.268	193.108	236.935	197.023	197.03	0.00651756	0.238686	0.577183	0.238775
Gsn	Gelsolin OS=Mus musculus GN=Gsn PE=1 SV=3	5.76	86340.9	454.789	P13020	16	29.1	0	GELS_MOUSE	1066.53	872.13	782.673	928.931	972.637	1260.63	1039.53	1018.71	988.24	933.555	1034.71	845.449	980.588	976.699	-0.00727608	0.238256	0.577756	0.238367
Cntn1	Contactin-1 OS=Mus musculus GN=Cntn1 PE=1 SV=1	5.73	114244	1779.06	P12960	35	46.86	0	CNTN1_MOUSE	1801.11	1810.18	1850.27	1820.91	1642.4	1396.83	1588.33	1626.29	1783.99	1839.15	1705.05	1781.93	1720.28	1720.79	-0.00518396	0.238238	0.577779	0.238294
Dynll2	Dynein light chain 2, cytoplasmic OS=Mus musculus GN=Dynll2 PE=1 SV=1	7.24	10463.9	9372.28	Q9D0M5	5	62.92	0	DYL2_MOUSE	74.7944	234.649	241.796	235.009	172.287	299.063	283.484	149.195	92.8688	219.164	271.481	203.948	209.6	203.357	0.0180801	0.236813	0.579678	0.237503
Rab3a	Ras-related protein Rab-3A OS=Mus musculus GN=Rab3a PE=1 SV=1	4.66	25198	2833	P63011	6	35.45	0	RAB3A_MOUSE	190.739	219.963	207.088	205.509	182.779	203.458	175.104	176.258	204.768	201.326	245.747	216.488	201.589	203.282	-0.0046235	0.236813	0.579678	0.236859
Atp6v1h	V-type proton ATPase subunit H OS=Mus musculus GN=Atp6v1h PE=1 SV=1	6.17	56311.3	483.791	Q8BVE3	5	14.29	0	VATH_MOUSE	150.041	219.763	214.939	171.621	212.687	252.383	NA	184.475	NA	146.039	283.413	207.337	203.572	205.316	0.00863238	0.235498	0.581436	0.235656
Atp5h	ATP synthase subunit d, mitochondrial OS=Mus musculus GN=Atp5h PE=1 SV=3	5.37	18806.5	4910.1	Q9DCX2	10	76.4	0	ATP5H_MOUSE	363.734	381.747	330.321	415.844	96.1257	360.595	464.789	81.5295	367.956	373.295	402.652	336.085	324.728	337.718	-0.015232	0.233951	0.583511	0.234446
Atp5i	ATP synthase subunit e, mitochondrial OS=Mus musculus GN=Atp5i PE=1 SV=2	9.74	8235.62	1911.32	Q06185	2	32.39	0	ATP5I_MOUSE	113.283	22.9508	47.2737	18.0648	NA	NA	35.2487	NA	106.836	34.0364	19.2803	35.9826	50.3931	46.2769	-0.0106247	0.233951	0.583511	0.234192
Sod2	Superoxide dismutase [Mn], mitochondrial OS=Mus musculus GN=Sod2 PE=1 SV=3	8.82	24831.1	3420.61	P09671	8	51.35	0	SODM_MOUSE	643.404	607.174	622.888	704.927	412.281	497.839	583.62	426.194	628.153	503.523	692.077	632.125	581.419	577.615	0.00545496	0.233951	0.583511	0.234014
Rab7a	Ras-related protein Rab-7a OS=Mus musculus GN=Rab7a PE=1 SV=2	6.57	23774.9	1388.38	P51150	8	51.21	0	RAB7A_MOUSE	133.299	134.135	132.748	124.621	134.909	132.199	120.963	121.007	108.022	161.938	145.894	139.746	131.985	132.928	0.00252472	0.233951	0.583511	0.233964
Atp1a2	Sodium/potassium-transporting ATPase subunit alpha-2 OS=Mus musculus GN=Atp1a2 PE=1 SV=1	5.23	113529	8380.14	Q6PIE5	45	49.8	0	AT1A2_MOUSE	2331.55	2102.02	2428.62	2787.72	2092.11	1774.03	2265.52	2515.32	2129.42	2035.96	2292.91	2196.66	2252.68	2239.3	-0.0024941	0.233951	0.583511	0.233964
Prdx5	Peroxiredoxin-5, mitochondrial OS=Mus musculus GN=Prdx5 PE=1 SV=2	9.13	22239.7	5636.67	P99029	11	59.52	0	PRDX5_MOUSE	1918.04	1859.85	1492.13	1400.95	1244.95	1472.57	1970.26	1204.19	1575.26	1464.59	1557.55	1617.97	1564.75	1564.97	-0.0021635	0.233951	0.583511	0.233961
Ncam1	Neural cell adhesion molecule 1 OS=Mus musculus GN=Ncam1 PE=1 SV=3	4.54	120226	1762.2	P13595	25	28.79	0	NCAM1_MOUSE	4826.29	4376.85	4576.51	4453.09	4667.19	4603.28	4783.39	4518.11	4778.93	5339.1	4216.07	3942.69	4583.87	4596.38	0.00216094	0.233951	0.583511	0.233961
Tnr	Tenascin-R OS=Mus musculus GN=Tnr PE=1 SV=2	4.65	151928	330.693	Q8BYI9	13	13.03	0	TENR_MOUSE	904.375	771.799	839.946	855.058	780.15	957.862	825.961	923.311	1015.22	851.632	780.159	723.171	851.532	853.242	0.00168156	0.233951	0.583511	0.233957
Cadm4	Cell adhesion molecule 4 OS=Mus musculus GN=Cadm4 PE=1 SV=1	5.88	43179.6	2251.97	Q8R464	12	46.65	0	CADM4_MOUSE	687.713	676.398	697.143	728.22	707.762	797.277	759.462	686.481	670.299	786.15	697.666	697.013	715.752	716.179	-0.000612856	0.23248	0.585491	0.23248
Cmtm5	CKLF-like MARVEL transmembrane domain-containing protein 5 OS=Mus musculus GN=Cmtm5 PE=1 SV=1	4.55	17617.5	1198.07	Q9D6G9	2	16.67	0	CKLF5_MOUSE	NA	NA	NA	NA	NA	NA	213.724	208.118	242.116	259.272	169.157	159.824	0	208.702	NA	NA	NA	0
Camk2d	Calcium/calmodulin-dependent protein kinase type II subunit delta OS=Mus musculus GN=Camk2d PE=1 SV=1	6.85	56996.8	687.882	Q6PHZ2	5	11.42	0	KCC2D_MOUSE	NA	NA	NA	NA	NA	NA	80.0052	87.6212	79.0334	86.48	83.5113	95.3591	0	85.335	NA	NA	NA	0
