# Supplementary material for: Progressive axonopathy when oligodendrocytes lack the myelin protein CMTM5
Source: eLife. 2022 Mar 11;11:e75523. doi: 10.7554/eLife.75523 (PMC8916772; doi:10.7554/eLife.75523)
Supplement: Figure 2—source data 2. [file elife-75523-fig2-data2.xlsx]

## Sheet: Sheet1
Fig 2 D			Fig 2 E			Fig 2 F			Fig 2 G					Fig 2 I			Fig 2 J			Fig 2 K			Fig 2 L					Fig 2 N
Unmyelinated axons at P30			Myelin pathology at P30			Mean g-ratios			CTRL (n=5)		Cmtm5 cKO (n=4)			Unmyelinated axons at P75			Myelin pathology at P75			Mean g-ratios			CTRL		cKO			CA2 positive cells [#]
Cmtm5fl/fl (n=4)	Cmtm5 cKO (n=4)		Cmtm5fl/fl (n=4)	Cmtm5 cKO (n=4)		CTRL (n=5)	Cmtm5 cKO (n=4)		Diameter	g-ratio	Diameter	g-ratio		Cmtm5fl/fl(n=5)	Cmtm5 cKO (n=5)		Cmtm5fl/fl(n=5)	Cmtm5 cKO (n=5)		Cmtm5fl/fl(n=5)	Cmtm5 cKO (n=5)		Diameter	g-Ratio	Diameter	G-Ratio		Cmtm5fl/fl (n=5)	Cmtm5 cKO (n=6)
0.3	2.2		0.8	3.4		0.818883	0.811846		3.513	0.883996	1.784	0.901465		2.5143	5.9406		4.0762	4.7305		0.822989	0.831158		0.499937	0.714888	1.6526	0.724987		854	872
2.2	7		1.5	2.4		0.837353	0.82112		1.907	0.788995	0.666	0.695198		1.4039	2.3157		0.5224	1.8891		0.831992	0.819868		1.09383	0.621858	0.69292	0.67972		1020	717
4.6	14		0.5	1.6		0.832658	0.826902		1.588	0.831414	1.605	0.88674		1.3839	2.4609		2.1527	1.566		0.818797	0.820394		0.719425	0.807508	0.720221	0.750345		987	877
1.3	5.7		0.9	1.2		0.806057	0.830082		1.035	0.805447	1.493	0.878752		1.9527	1.0814		2.1069	1.4798		0.816919	0.816214		0.577792	0.75294	0.677685	0.743446		629	649
						0.840801			0.87	0.832536	1.147	0.798747		1.6211	1.1708		1.1145	1.8627			0.82912		0.947503	0.725122	0.53962	0.692282		609	829
									1.118	0.77801	0.876	0.805147											0.48599	0.571375	1.03017	0.764527			677
									0.864	0.752613	0.62	0.639835											0.575252	0.757701	1.03835	0.791118
									0.702	0.778271	1.046	0.831479											0.610369	0.780596	0.560908	0.73897
									1.271	0.774056	2.077	0.877111											0.65446	0.792737	0.640001	0.758273
									2.562	0.881321	0.682	0.695918											0.918226	0.741312	0.481383	0.612393
									1.455	0.784367	1.259	0.847811											0.478864	0.753512	0.871997	0.646463
									1.014	0.8112	0.801	0.782227											0.62866	0.801074	1.05665	0.706262
									0.9	0.756303	0.95	0.730769											0.896192	0.687909	1.38887	0.831924
									1.863	0.877532	1.06	0.839272											0.492625	0.614654	1.11498	0.789116
									1.244	0.859116	1.016	0.797488											1.61481	0.687497	0.501843	0.722617
									1.959	0.888033	1.65	0.900655											0.719159	0.782496	0.62378	0.726691
									1.61	0.868393	1.313	0.8196											0.650851	0.760729	0.823485	0.784725
									1.176	0.820084	0.806	0.744917											0.729617	0.797247	0.880063	0.77722
									0.904	0.822566	1.382	0.825568											0.700141	0.6959	0.86238	0.76274
									1.225	0.799087	2.098	0.822745											0.880425	0.775617	1.2671	0.786796
									1.302	0.756977	1.282	0.83355											0.571922	0.815492	0.989184	0.681845
									0.886	0.721498	1.523	0.81706											0.420085	0.71634	1.60254	0.852093
									0.986	0.733631	1.122	0.787921											0.928636	0.679015	0.974465	0.790331
									0.81	0.763431	1.057	0.817479											0.461395	0.747046	0.603867	0.712349
									1.088	0.774929	1.273	0.901558											0.560567	0.781112	0.957461	0.716115
									0.943	0.822145	1.093	0.800733											0.69759	0.76098	0.92217	0.718159
									0.779	0.790061	1.109	0.805959											0.994127	0.709257	0.736824	0.752358
									0.753	0.822052	0.71	0.725971											0.690251	0.797947	0.765138	0.647708
									1.937	0.890984	1.102	0.788269											0.834543	0.678556	0.510895	0.619071
									1.489	0.814997	1.511	0.817198											0.523816	0.732441	1.10575	0.72839
									1.469	0.81385	2.723	0.871918											0.614112	0.629656	0.881292	0.754693
									1.16	0.866966	1.356	0.851224											0.979612	0.676066	0.797645	0.580672
									2.047	0.860446	3.002	0.895051											0.995151	0.80677	0.937845	0.714014
									1.064	0.736332	0.926	0.817299											0.68003	0.699823	0.789624	0.688851
									1.158	0.813202	1.401	0.742448											0.531657	0.794042	1.16174	0.747711
									1.943	0.868574	1.588	0.832285											0.501717	0.736469	1.21058	0.666763
									1.835	0.825833	1.088	0.671605											0.585889	0.647925	0.974269	0.715555
									0.945	0.827496	1.684	0.822667											0.376615	0.680024	0.741732	0.748093
									1.418	0.861482	2.325	0.804777											0.750096	0.734638	0.73967	0.670255
									2.75	0.784593	1.656	0.886035											0.531657	0.745356	0.563399	0.65208
									1.2	0.858369	2.143	0.848041											0.966198	0.695443	1.50798	0.734781
									1.234	0.856944	2.908	0.856554											0.69338	0.788913	0.475662	0.639145
									1.657	0.782711	1.089	0.781205											0.424457	0.673551	1.54221	0.820164
									0.999	0.816844	1.179	0.811425											0.643275	0.725007	0.692277	0.672004
									0.753	0.784375	1.112	0.840514											0.712846	0.638777	0.57702	0.642992
									1.341	0.90303	2.187	0.834414											1.72424	0.718585	0.64169	0.666827
									1.199	0.829184	1.497	0.921798											0.467427	0.739136	0.681993	0.690529
									1.014	0.771689	2.145	0.859719											0.561815	0.786849	0.589679	0.704532
									1.19	0.794923	0.75	0.703565											0.643968	0.711213	0.562834	0.735518
									1.064	0.748768	1.161	0.786053											0.791878	0.649911	1.47555	0.744751
									0.981	0.857517	1.162	0.850659											0.57025	0.770415	0.717031	0.717122
									1.138	0.780521	1.331	0.81357											0.684695	0.750102	0.576247	0.708944
									2.151	0.797553	2.222	0.912151											0.372878	0.713506	0.670698	0.785226
									1.262	0.869745	2.224	0.801441											0.60112	0.701749	0.587408	0.678481
									1.615	0.827357	1.318	0.767618											1.53144	0.719518	0.761635	0.69464
									0.898	0.774138	1.221	0.765517											0.59248	0.565936	0.504627	0.54878
									1.415	0.832353	1.708	0.816444											0.61773	0.705285	0.71969	0.668018
									2.063	0.853891	1.272	0.839604											0.729617	0.737403	0.738205	0.747396
									1.993	0.88696	0.682	0.727079											0.619376	0.623317	0.474859	0.705416
									1.244	0.876056	1.868	0.87782											0.910847	0.763431	0.683485	0.685363
									2.637	0.854227	0.852	0.782369											0.472305	0.610286	0.606077	0.692614
									0.978	0.754048	0.657	0.725166											0.591835	0.75376	0.60006	0.699784
									1.238	0.863922	2.083	0.839919											0.594839	0.763442	0.610473	0.74932
									1.25	0.84631	1.651	0.868947											1.38933	0.777784	0.622452	0.715503
									1.018	0.811155	0.879	0.774449											0.428041	0.701643	0.376953	0.581182
									1.547	0.883495	1.228	0.846313											1.08007	0.772576	0.549788	0.721299
									1.265	0.832237	2.155	0.84114											0.574809	0.706427	0.757192	0.719435
									1.565	0.896334	1.612	0.888154											0.417805	0.689121	1.23298	0.728955
									1.382	0.785674	1.067	0.816998											0.598573	0.74975	0.995023	0.777602
									0.763	0.755446	0.95	0.791007											0.499427	0.754856	0.879702	0.692342
									1.257	0.828063	1.091	0.829027											0.813686	0.757721	0.501717	0.755138
									1.115	0.764222	0.935	0.810928											1.20161	0.849067	0.686366	0.736075
									1.228	0.844567	1.691	0.877985											0.832175	0.685635	1.29247	0.725738
									1.029	0.749454	1.528	0.903073											0.752215	0.673127	0.894556	0.774412
									2.678	0.896852	0.577	0.777628											0.459321	0.728176	0.532614	0.685886
									1.106	0.758053	0.679	0.759508											0.733707	0.736619	0.553251	0.632982
									0.763	0.812567	2.299	0.90334											0.809214	0.782472	1.02347	0.785313
									0.92	0.765391	1.494	0.85567											0.830107	0.720339	0.796767	0.717693
									1.319	0.816213	1.189	0.873622											0.564641	0.780447	0.994895	0.704799
									2.588	0.879973	2.196	0.885127											0.573145	0.771641	0.784041	0.788724
									1.528	0.830435	1.313	0.823197											0.70105	0.736453	1.03017	0.801956
									1.797	0.831559	1.414	0.858531											0.754412	0.695119	0.697773	0.743802
									1.15	0.759577	1.774	0.824349											0.609325	0.747839	0.713203	0.809668
									1.425	0.869963	1.07	0.797912											0.870974	0.786447	1.24122	0.752296
									0.877	0.794384	1.612	0.795264											1.47985	0.739409	1.20636	0.760361
									1.165	0.814116	0.79	0.73694											1.0327	0.723533	0.714452	0.749533
									2.767	0.838739	0.899	0.842549											0.449373	0.706884	0.535713	0.592298
									2.197	0.858874	1.779	0.823993											0.494302	0.745918	0.760715	0.659176
									1.698	0.840594	1.167	0.818947											0.791878	0.727168	0.776453	0.710529
									1.935	0.873984	0.957	0.804202											0.71783	0.82828	1.29395	0.740523
									1.273	0.852646	1.357	0.870988											0.484415	0.617652	1.03455	0.687976
									1.079	0.859076	1.719	0.87038											0.685995	0.769986	1.1264	0.691662
									0.89	0.793934	2.228	0.850706											0.547118	0.806663	0.439344	0.619828
									1.711	0.854219	0.939	0.847473											1.05978	0.724394	0.72568	0.716435
									1.756	0.889564	1.572	0.846071											0.519054	0.780334	0.722779	0.764508
									0.959	0.839755	1.416	0.84689											0.536663	0.726898	0.725593	0.749598
									1.035	0.834005	0.932	0.749799											0.46579	0.665453	0.439634	0.692547
									0.82	0.781697	0.743	0.77801											1.63323	0.70618	0.94407	0.771189
									1.67	0.839196	1.955	0.8344											0.681339	0.758579	0.62429	0.661323
									1.009	0.869078	1.389	0.847468											0.560454	0.717208	1.17156	0.733799
									1.275	0.799875	0.785	0.814315											0.508773	0.720983	0.896263	0.803711
									2.514	0.851338	0.79	0.68636											0.531537	0.727212	0.990856	0.653245
									0.708	0.762931	1.829	0.87806											0.664499	0.720961	0.457098	0.677795
									0.675	0.809353	1.946	0.832335											0.788171	0.744433	0.710252	0.78564
									1.301	0.885034	1.258	0.804348											0.521013	0.821131	0.853848	0.728476
									0.993	0.737194	1.042	0.732256											0.530098	0.755562	0.754919	0.624961
									0.957	0.741286	1.743	0.830395											0.499682	0.714989	0.718451	0.728633
									1.29	0.735043	0.946	0.786367											0.634205	0.681586	0.439923	0.645674
									1.156	0.816961	1.763	0.815449											0.579003	0.771817	0.975444	0.786202
									1.177	0.790995	1.108	0.842586											0.954064	0.726094	0.439489	0.69025
									2.91	0.803202	1.373	0.862437											0.611827	0.80919	0.833933	0.787565
									0.95	0.715901	1.057	0.847634											1.19203	0.768628	1.04361	0.814942
									2.295	0.827027	1.767	0.881297											0.457794	0.778485	0.567789	0.684628
									0.855	0.818182	1.169	0.829666											1.40119	0.647847	0.725593	0.731152
									0.974	0.749808	1.764	0.869822											0.701685	0.604853	0.724275	0.722987
									1.692	0.851535	2.237	0.804387											0.646533	0.776563	0.627038	0.73533
									2.795	0.875078	0.628	0.769608											1.00324	0.743503	0.723396	0.719557
									1.42	0.739969	1.044	0.804934											0.466063	0.702388	0.705666	0.74524
									1.149	0.854275	1.395	0.850091											0.778418	0.737191	0.58654	0.736372
									1	0.844595	1.315	0.856678											1.34272	0.65024	1.83479	0.732108
									1.298	0.875843	1.793	0.846553											0.680311	0.705797	1.31348	0.757889
									2.631	0.892772	1.615	0.834625											0.989055	0.745879	0.470008	0.720305
									1.777	0.863879	1.19	0.835674											0.529497	0.718705	0.568573	0.736089
									0.989	0.761355	1.473	0.871598											0.849288	0.692002	1.62463	0.724071
									1.255	0.802943	0.738	0.760825											0.461533	0.72025	1.46429	0.783249
									1.985	0.802344	0.942	0.779156											1.62581	0.719428	0.815952	0.729939
									1.341	0.859615	0.851	0.768051											1.52269	0.714502	0.728744	0.739218
									2.514	0.838	1.865	0.851987											0.618657	0.705758	0.87433	0.750837
									2.118	0.854377	1.219	0.783923											0.507143	0.69293	1.08881	0.694936
									1.291	0.838856	1.153	0.772271											1.07688	0.756618	0.603023	0.704215
									0.717	0.768489	2.316	0.873962											1.03109	0.813418	0.838121	0.776541
									2.01	0.881579	1.253	0.769656											0.815015	0.712037	0.560908	0.727408
									2.242	0.83037	0.461	0.637621											0.868412	0.680778	0.63641	0.683955
									1.151	0.861527	1.52	0.845854											1.92917	0.766973	0.82333	0.707705
									1.318	0.814083	1.371	0.867722											0.538912	0.708506	0.594089	0.648467
									1.038	0.782805	1.569	0.879978											0.535118	0.70908	1.07071	0.784773
									0.531	0.803328	1.018	0.82899											0.998663	0.751224	0.851908	0.652206
									0.849	0.805503	2.174	0.870994											0.69759	0.72165	0.562608	0.711123
									1.057	0.8456	0.993	0.800161											1.8763	0.743937	1.43086	0.727886
									1.548	0.837209	1.235	0.859429											0.680217	0.680823	0.752976	0.719159
									3.439	0.83552	0.87	0.800368											0.584147	0.662288	0.592265	0.722207
									1.409	0.791129	1.662	0.83017											0.950789	0.797622	0.557035	0.702296
									1.6	0.791296	1.891	0.871429											0.68162	0.712844	1.18775	0.759858
									1.029	0.851821	2.092	0.842869											0.81478	0.813176	0.770031	0.738412
									0.999	0.896768	1.461	0.799672											0.722074	0.778254	0.688774	0.732832
									1.232	0.831309	1.162	0.865872											0.44252	0.723031	1.08747	0.827926
									2.185	0.79978	1.747	0.814832											0.702954	0.794779	0.670413	0.6622
									1.365	0.754144	1.374	0.810142											1.16229	0.645421	0.665265	0.751372
									0.918	0.795494	2.366	0.835747											0.470143	0.733572	0.523573	0.739033
									0.88	0.828625	2.247	0.796809											0.555319	0.782652	0.760129	0.698014
									1.148	0.780421	1.295	0.828005											0.564641	0.744382	0.994959	0.73302
									1.886	0.812231	1.742	0.810987											1.30863	0.668908	1.01867	0.74791
									1.073	0.81971	2.111	0.862337											0.488342	0.712742	0.599211	0.718273
									1.025	0.812847	1.808	0.783362											0.810472	0.697309	0.472978	0.700852
									1.66	0.84264	0.757	0.750248											0.60239	0.750494	0.532136	0.734715
									1.648	0.836124	1.2	0.795229											0.464284	0.641032	0.550945	0.721552
									0.938	0.777133	2.204	0.867375											0.538794	0.762454	0.59516	0.745178
									1.895	0.821769	1.24	0.80415											0.426103	0.695262	0.642483	0.604806
									1.612	0.847975	2.287	0.880971											0.625411	0.610105	0.588815	0.698315
									1.293	0.816804	1.359	0.844099											0.480854	0.607047	0.67731	0.728499
									0.84	0.789474	1.881	0.855											0.591942	0.809564	0.648597	0.675866
									1.155	0.816254	1.178	0.730769											0.537018	0.718703	1.12719	0.72187
									1.219	0.823093	1.042	0.773571											0.697225	0.742681	0.728307	0.689459
									1.626	0.86859	2.263	0.904838											0.628052	0.748003	0.885472	0.713685
									0.859	0.770404	1.896	0.883916											0.667176	0.714294	1.08506	0.693985
									1.084	0.872786	0.656	0.783751											0.463872	0.747571	0.703045	0.661667
									0.848	0.814601	1.59	0.841715											0.910148	0.713217	0.705034	0.716765
									1.059	0.765173	1.538	0.884925											0.463598	0.712295	0.576137	0.734526
									0.803	0.868108	1.116	0.809869											0.460843	0.786134	0.714363	0.671072
									0.888	0.839319	1.002	0.736223											1.56231	0.799908	0.716143	0.604306
									1.45	0.862069	0.512	0.636025											0.456122	0.662401	0.826263	0.728262
									1.401	0.802405	0.989	0.75152											0.865549	0.719376	0.556578	0.698336
									0.978	0.873214	1.32	0.786651											0.701957	0.699555	0.867752	0.697961
									1.369	0.832725	0.891	0.818182											0.555319	0.73841	0.94804	0.735472
									0.979	0.82616	1.356	0.784722											1.00578	0.76715	0.699322	0.669315
									1.078	0.869355	0.817	0.711053											0.706838	0.750538	0.524787	0.720904
									1.727	0.866533	1.223	0.805135											0.455004	0.696999	0.65134	0.649193
									1.418	0.786031	0.727	0.627265											0.640697	0.701258	0.586106	0.650601
									1.965	0.803681	0.589	0.708785											0.475796	0.568623	0.63159	0.746907
									0.739	0.813877	0.607	0.72348											1.1251	0.747565	0.595694	0.665805
									0.687	0.774521	1.345	0.788394											1.25853	0.745889	0.788575	0.757437
									1.203	0.86922	1.169	0.761068											0.891348	0.796495	0.298562	0.664817
									1.608	0.869189	1.189	0.754442											0.743533	0.78618	0.549672	0.751486
									1.63	0.876815	0.833	0.832168											0.506892	0.751421	0.495845	0.660594
									1.195	0.746875	1.433	0.789532											0.692185	0.800251	0.625004	0.731602
									0.6	0.738007	1.948	0.816087											0.625411	0.760612	0.468107	0.767713
									0.963	0.799834	0.767	0.718838											0.696768	0.700704	0.694297	0.829601
									2.516	0.820346	1.68	0.896											0.405903	0.730034	0.666222	0.807211
									1.674	0.775359	0.652	0.687039											0.4662	0.713616	0.620403	0.726216
									0.925	0.845521	0.705	0.736677											0.87673	0.781093	0.730402	0.687337
									1.403	0.764995	0.922	0.791416											0.52199	0.761129	1.30863	0.78801
									1.417	0.812966	1.491	0.794353											0.890991	0.710822	1.12804	0.756134
									3.151	0.832277	1.119	0.827051											0.66689	0.709907	1.01861	0.756479
									0.832	0.77037	0.81	0.725806											0.657081	0.741467	0.705124	0.70209
									1.128	0.797173	1.26	0.825688											0.839714	0.742694	0.986864	0.835024
									0.818	0.805118	0.463	0.732595											1.55373	0.849389	0.506515	0.718703
									0.671	0.732533	1.037	0.767012											0.574033	0.803259	0.446958	0.654833
									1.675	0.833748	0.938	0.842767											0.625208	0.76397	0.497767	0.624484
									0.788	0.79196	0.81	0.708042											1.16775	0.757395	0.628761	0.772139
									1.113	0.813002	1.303	0.837942											0.830643	0.699342	0.813294	0.732694
									1.508	0.823594	0.8	0.880088											0.889274	0.712927	0.966462	0.751493
									1.436	0.843218	0.8	0.793651											1.26761	0.808423	0.763055	0.651617
									1.698	0.845197	0.979	0.824768											0.382486	0.662357	0.678718	0.633156
									1.552	0.78942	1.315	0.863995											1.42462	0.766513	0.562608	0.678757
									1.054	0.825372	1.456	0.777363											1.16064	0.730619	0.819455	0.620228
									3.218	0.900392	1.317	0.812461											0.542092	0.690265	0.555318	0.74764
									1.416	0.805919	1.772	0.821511											0.832022	0.731531	0.621531	0.713485
									1.77	0.891239	1.781	0.854607											0.664499	0.746577	0.415666	0.640579
									0.843	0.796034	1.246	0.891911											0.45008	0.686693	0.486906	0.716895
									1.783	0.883548	1.011	0.756171											0.720486	0.750518	0.641789	0.614036
									1.182	0.762089	1.672	0.839779											1.14072	0.796238	0.833016	0.712354
									1.777	0.871078	1.268	0.86376											1.15072	0.767617	0.596122	0.728914
									0.727	0.834673	1.177	0.854757											1.68011	0.828351	0.284768	0.624323
									1.251	0.828477	1.004	0.855196											0.873018	0.772535	1.53766	0.69559
									1.603	0.906162	2.181	0.883712											0.82333	0.752584	0.983504	0.780527
									1.302	0.888737	1.407	0.882132											1.27612	0.764385	0.875276	0.754488
									1.485	0.828683	1.1	0.814212											1.52686	0.773415	0.479793	0.62456
									1.739	0.829676	0.86	0.81749											2.10103	0.815517	0.873383	0.824074
									0.826	0.792706	1.308	0.78653											1.24224	0.765	0.61773	0.70019
									1.252	0.854025	0.758	0.821235											1.84965	0.860361	0.521257	0.732704
									1.008	0.844221	2.149	0.857542											0.626022	0.750686	0.71783	0.789789
									1.789	0.886082	1.478	0.765407											0.872435	0.741248	0.637509	0.718625
									2.225	0.824379	1.168	0.751125											0.666317	0.760003	0.690066	0.65751
									1.412	0.804558	0.808	0.806387											0.892561	0.828478	1.31203	0.804295
									0.865	0.820683	0.943	0.784526											0.586649	0.798813	1.18507	0.719442
									0.927	0.867978	1.403	0.839115											1.09243	0.77638	1.93114	0.80948
									1.077	0.829738	0.98	0.787149											0.737515	0.740585	0.761133	0.703368
									1.199	0.890126	1.476	0.862653											0.784528	0.767096	0.553021	0.700861
									1.344	0.857143	0.861	0.858425											0.849138	0.754645	0.723836	0.725268
									1.289	0.868013	1.368	0.804706											0.879629	0.797039	0.603023	0.783116
									1.25	0.830013	1.054	0.846586											0.795087	0.776476	0.795647	0.67945
									1.388	0.832134	0.853	0.7542											0.870828	0.818147	0.496615	0.739817
									0.908	0.801412	1.347	0.80707											1.23659	0.791311	0.575141	0.767191
									1.184	0.867399	0.719	0.748958											0.563399	0.761779	0.485465	0.669384
									1.036	0.83751	0.935	0.836315											0.602601	0.794866	0.755003	0.802431
									1.115	0.851145	0.95	0.811272											1.40527	0.709858	0.677685	0.749559
									0.994	0.805511	1.041	0.813281											0.571477	0.73671	0.82711	0.759971
									2.056	0.821086	0.911	0.720158											1.16884	0.782364	0.826263	0.722919
									2.518	0.876436	1.56	0.877884											0.853326	0.771353	1.72424	0.871407
									1.625	0.846795	0.542	0.664216											0.728395	0.777175	0.633804	0.728123
									1.311	0.79939	1.292	0.852805											0.883601	0.84886	1.72055	0.779236
									1.663	0.82572	1.027	0.839738											0.556006	0.765077	0.703769	0.631806
									1.812	0.82967	2.191	0.900905											0.762136	0.775175	1.28704	0.794318
									2.31	0.861298	1.44	0.845567											0.517949	0.748083	0.671267	0.730166
									0.955	0.757937	0.742	0.768116											0.895979	0.783533	0.678437	0.648456
									2.687	0.838901	0.539	0.684879											0.944002	0.830805	0.485203	0.626221
									3.1	0.861111	1.192	0.855707											0.655238	0.766457	0.638108	0.703759
									1.481	0.885236	0.699	0.721362											1.69633	0.790351	0.986671	0.748704
									1.466	0.883133	0.771	0.774096											0.577792	0.762226	0.426999	0.645949
									1.245	0.866992	0.859	0.872967											1.07847	0.748159	0.71231	0.75167
									1.696	0.860914	0.927	0.852022											1.06367	0.817694	0.565092	0.688811
									1.091	0.77157	1.331	0.79892											0.726732	0.740336	0.661041	0.650524
									1.198	0.822802	1.998	0.89919											0.468651	0.692604	0.547002	0.671736
									2.039	0.881539	1.312	0.816936											0.530338	0.753182	0.754244	0.721501
									0.737	0.798483	1.715	0.80028											0.750605	0.695076	0.641094	0.64984
									1.137	0.790132	1.089	0.836406											0.753061	0.774823	0.579442	0.702987
									2.143	0.861334	1.298	0.836879											0.653194	0.747017	0.85258	0.714913
									2.194	0.836447	1.284	0.828387											0.714808	0.777586	1.77375	0.849264
									0.747	0.819978	0.816	0.829268											1.19842	0.760177	0.782008	0.769519
									1.876	0.820289	0.9	0.78125											0.579882	0.743777	1.32314	0.87498
									1.847	0.856282	0.749	0.830377											0.587408	0.712784	0.922308	0.751181
									1.612	0.82794	1.465	0.87988											0.622759	0.730505	0.550829	0.702406
									1.303	0.851078	2.179	0.870555											0.583602	0.746675	1.06116	0.830902
									1.417	0.819075	0.884	0.793537											0.635509	0.715098	1.1856	0.815021
									1.392	0.84466	0.835	0.817025											0.572812	0.636444	0.64732	0.70786
									2.246	0.833086	1.209	0.875453											0.720662	0.668006	0.674578	0.706267
									1.804	0.88867	1.288	0.85298											0.834772	0.7774	1.03362	0.806514
									1.995	0.899054	0.946	0.793624											0.941571	0.753314	0.58032	0.673506
									1.529	0.860439	0.734	0.800436											0.706657	0.766873	0.760129	0.683809
									1.514	0.856335	0.964	0.77492											0.465516	0.731013	0.5477	0.764033
									1.873	0.850977	1.435	0.867069											0.425206	0.735495	0.397023	0.564501
									2.133	0.853541	0.977	0.836473											0.738205	0.773802	1.72756	0.761142
									1.618	0.821737	2.14	0.822128											0.630884	0.737905	1.00438	0.804881
									1.549	0.814406	1.725	0.865529											1.13007	0.792498	0.737601	0.709268
									1.513	0.860637	1.208	0.815665											1.43131	0.763941	1.09138	0.718725
									1.609	0.842408	1.971	0.885445											0.785987	0.540312	0.796527	0.810848
									2.242	0.846677	0.773	0.783976											1.0419	0.785735	0.864371	0.805143
									1.686	0.845961	1.359	0.850971											0.69759	0.720522	0.613282	0.685517
									1.78	0.806525	1.062	0.814417											0.766966	0.792663	0.527691	0.660241
									1.331	0.824149	1.648	0.85212											0.61463	0.743659	0.561475	0.763634
									2.088	0.869276	1.22	0.836763											2.31276	0.752546	0.765969	0.805047
									1.864	0.874296	2.72	0.885129											1.01948	0.701881	0.865843	0.713374
									0.837	0.794118	0.833	0.749775											1.15624	0.817535	1.15899	0.787774
									1.22	0.85554	0.734	0.744422											0.663253	0.76615	0.759375	0.786424
									1.234	0.77904	2.141	0.85846											0.691541	0.740649	0.957661	0.756086
									2.138	0.861749	3.066	0.849778											0.536425	0.751102	1.17156	0.753437
									1.586	0.859621	0.936	0.697466											0.74712	0.732528	1.80928	0.804842
									1.797	0.861457	2.084	0.852352											0.69622	0.720086	1.30911	0.811686
									2.593	0.894755	1.38	0.826842											0.977075	0.724364	0.799399	0.762788
									1.096	0.80117	0.95	0.785773											0.995407	0.784953	1.52728	0.781582
									1.881	0.852288	0.877	0.840038											0.668606	0.75313	0.994063	0.753209
									2.774	0.871779	0.928	0.797936											0.505635	0.787001	0.612139	0.668778
									3.241	0.866578	1.289	0.781686											0.874621	0.763371	1.08071	0.644403
									1.017	0.732181	0.588	0.756757											0.851683	0.6402	0.638008	0.696037
									2.182	0.840848	0.536	0.771223											1.59816	0.804034	0.492237	0.668602
									1.007	0.856293	1.327	0.827823											0.778909	0.752989	0.845155	0.725102
									1.029	0.804535	0.754	0.729207											1.39207	0.769258	0.945215	0.730488
									1.02	0.830619	1.309	0.800612											0.784203	0.618403	0.471495	0.637886
									1.174	0.797013	1.013	0.800791											0.535832	0.662292	1.03897	0.731592
									2.556	0.821601	1.026	0.859296											0.556349	0.702855	0.646533	0.705979
									0.604	0.759748	0.884	0.776119											0.773825	0.733511	0.812903	0.72566
									1.907	0.825184	1.18	0.804363											0.782903	0.717926	0.74712	0.767573
									2.027	0.830057	0.667	0.842172											0.986929	0.774597	0.567789	0.703367
									1.698	0.874807	0.996	0.865334											0.632497	0.713956	0.69558	0.728052
									2.073	0.855198	0.828	0.830491											0.891777	0.812131	0.521135	0.665161
									1.661	0.849182	1.637	0.800098											0.53488	0.691658	0.562042	0.66698
									2.113	0.824103	1.291	0.776308											1.19842	0.731335	0.805745	0.75828
									1.524	0.85426	1.16	0.790729											0.563512	0.645314	0.739497	0.673345
									1.431	0.83101	1.324	0.8188											0.75778	0.753096	1.1963	0.765524
									1.029	0.861809	1.104	0.8832											1.20795	0.800587	0.620506	0.694808
									1.503	0.891988	1.158	0.823028											0.865107	0.744667	0.516596	0.794919
									0.793	0.787488	0.63	0.75179											1.07427	0.784704	0.756098	0.812465
									1.048	0.808019	1.092	0.804124											0.986154	0.818894	0.520157	0.703311
									2.801	0.886112	0.814	0.784957											1.07059	0.854106	0.572145	0.741029
									1.443	0.897946	0.831	0.837702											0.82364	0.729931	0.503869	0.657035
									1.566	0.860913	1.006	0.775636											0.615458	0.69716	0.427892	0.719083
									1.293	0.848982	0.963	0.769784											0.657662	0.673183	0.514125	0.77259
									1.306	0.829733	1.544	0.83913											0.791717	0.697469	0.703316	0.788353
									1.53	0.815131	1.369	0.858846											0.596335	0.662112	1.07871	0.755769
									1.021	0.875643	1.319	0.853722											1.06863	0.757275	0.650068	0.701008
									1.936	0.897959	0.876	0.848837											0.750436	0.751153	0.972438	0.718167
									1.752	0.816783	1.963	0.856457											0.982273	0.722925	1.34462	0.749621
									1.341	0.826757	1.99	0.85702											1.2407	0.754815	0.755424	0.815103
									0.864	0.821293	1.926	0.896231											0.77127	0.650529	1.1915	0.779931
									0.602	0.759142	1.122	0.844244											0.609011	0.783276	1.35217	0.750278
									0.82	0.820821	2.279	0.850373											0.922101	0.67864	0.463323	0.621351
									1.585	0.790524	1.955	0.891473											0.653681	0.703759	1.11447	0.743221
									1.197	0.755682	1.388	0.844796											1.01454	0.679276	1.02831	0.666421
									0.713	0.761752	1.096	0.868463											0.771105	0.644865	0.817588	0.757642
									2.066	0.872466	1.063	0.807137											0.849888	0.696625	0.858607	0.703171
									0.913	0.731571	0.791	0.768707											0.973027	0.743824	1.49824	0.761534
									2.331	0.862056	0.99	0.772231											0.620506	0.693481	0.657372	0.637471
									1.581	0.894737	0.754	0.83223											0.894343	0.717578	0.64278	0.704938
									1.784	0.875368	0.773	0.79445											0.555089	0.695423	0.784122	0.74217
									1.222	0.848611	1.355	0.82622											0.529738	0.712461	1.19895	0.709784
									1.645	0.837576	1.927	0.834199											0.56958	0.721331	0.82711	0.793241
									0.873	0.76378	1.557	0.861649											0.432627	0.633577	0.535832	0.719994
									0.713	0.754497	1.013	0.814964											0.619787	0.718633	0.582401	0.67247
									0.852	0.7985	1.082	0.831029											1.01404	0.721128	0.929732	0.695128
									1.46	0.873206	1.263	0.838645											1.34462	0.783193	0.719336	0.736116
									1.23	0.87296	0.922	0.808772											0.96975	0.763513	0.656111	0.770438
									0.777	0.762512	0.627	0.704494											0.913639	0.754713	0.713739	0.750892
									1.779	0.849976	1.203	0.885862											0.950387	0.735324	0.713917	0.792166
									0.828	0.867925	0.617	0.694038											0.960515	0.774811	0.626835	0.68877
									0.556	0.745308	1.039	0.810452											0.740444	0.680962	0.755424	0.682182
									1.195	0.835664	1.468	0.853488											1.13793	0.745274	1.10892	0.699472
									1.227	0.801961	1.087	0.796921											0.572367	0.759543	1.05863	0.745441
									1.605	0.848757	1.228	0.814864											0.974334	0.644138	1.07421	0.788419
									0.96	0.868778	1.321	0.835547											1.05472	0.711889	0.624902	0.666993
									0.691	0.70295	2.353	0.881604											0.907556	0.688923	0.555548	0.70356
									1.75	0.870214	1.452	0.886447											1.30375	0.743964	0.68581	0.667772
									1.027	0.80739	1.881	0.813933											0.547118	0.734991	0.554286	0.573677
									1.468	0.849537	1.17	0.826855											1.2304	0.711458	1.22313	0.804158
									2.252	0.890119	1.765	0.880299											0.873383	0.627603	1.47382	0.766595
									1.482	0.843483	1.593	0.770309											1.05803	0.718727	0.873602	0.810524
									1.302	0.806192	0.997	0.853596											0.898037	0.716153	0.48178	0.723567
									2.522	0.872966	0.821	0.751832											0.862011	0.728717	1.03565	0.748402
									1.568	0.831389	0.784	0.820084											0.73336	0.726364	0.757108	0.743962
									1.555	0.894707	1.029	0.818616											0.838349	0.697383	0.83026	0.826845
									0.653	0.822418	1.541	0.843459											0.927539	0.695222	0.75323	0.781021
									1.389	0.886407	1.189	0.800135											0.633402	0.788819	0.898675	0.745271
									1.043	0.869167	1.991	0.888839											0.673728	0.763914	0.639702	0.764784
									0.852	0.806055	1.137	0.709738											0.509398	0.694198	0.556235	0.769953
									1.217	0.861288	1.262	0.796215											1.67023	0.74308	0.448664	0.663249
									0.595	0.713429	1.886	0.820357											0.534761	0.706792	0.610786	0.757074
									1.369	0.906023	1.129	0.816932											0.520157	0.702494	0.549672	0.791278
									0.807	0.795858	0.951	0.885475											0.412746	0.694129	0.651046	0.729355
									1.868	0.840684	1.166	0.856723											1.53725	0.753267	0.853177	0.828242
									2.735	0.87548	1.034	0.856669											0.826109	0.680637	0.719425	0.750502
									3.245	0.860286	1.46	0.74604											0.639503	0.767908	0.853848	0.760823
									1.495	0.856243	1.437	0.870909											0.762888	0.75373	0.966594	0.799847
									1.184	0.8	0.764	0.716026											0.587516	0.698025	1.26308	0.714123
									1.276	0.881215	1.372	0.847437											0.543968	0.711483	0.301997	0.515834
									1.137	0.860061	0.762	0.808059											0.436582	0.713207	0.45835	0.625518
									1.416	0.880597	2.089	0.857906											0.741561	0.750011	0.619479	0.699433
									1.375	0.832324	1.529	0.855145											0.502857	0.732538	0.809528	0.761369
									1.345	0.893094	1.202	0.799202											0.570585	0.713767	0.735873	0.798997
									2.476	0.918057	1.755	0.830966											0.803926	0.730163	0.680685	0.700355
									1.206	0.796565	2.436	0.851153											0.543851	0.707869	0.846585	0.803539
									1.195	0.817933	0.793	0.742509											0.740014	0.765641	0.756014	0.731073
									1.541	0.86573	1.06	0.840603											0.38974	0.748746	0.571366	0.703888
									0.822	0.80826	1.563	0.877104											0.558633	0.763101	0.61463	0.728735
									1.033	0.823108	1.949	0.891583											0.596442	0.717783	0.859718	0.723169
									1.857	0.840271	1.244	0.843962											0.845607	0.740204	1.1856	0.770214
									1.209	0.79435	2.316	0.875946											1.04148	0.837004	1.93049	0.716281
									1.159	0.857883	1.284	0.814204											0.449089	0.752678	0.896547	0.689995
									2.652	0.872082	1.104	0.839544											0.540445	0.736596	0.893631	0.730607
									2.146	0.851587	1.594	0.841161											0.75593	0.692672	0.388759	0.643109
									1.152	0.79558	1.167	0.802613											0.712042	0.697964	0.651438	0.72609
									1.152	0.789582	1.211	0.801987											0.579332	0.72241	0.574699	0.651415
									1.234	0.807592	1.714	0.796098											0.952529	0.795172	0.591404	0.686664
									1.118	0.814275	1.143	0.739806											0.71463	0.798294	0.566779	0.670024
									2.928	0.874552	2.34	0.829199											0.705846	0.674537	0.720751	0.729677
									1.063	0.779326	0.847	0.852113											1.74626	0.697915	0.722163	0.730773
									1.931	0.88578	1.375	0.786613											0.820154	0.748964	0.815405	0.76202
									2.305	0.877761	1.373	0.885806											0.954265	0.740585	0.464421	0.720303
									1.552	0.869468	1.351	0.878414											0.583929	0.635405	1.55291	0.793244
									1.166	0.79863	1.212	0.825051											1.35875	0.738456	1.07912	0.707726
									0.89	0.837253	1.702	0.861336											1.1424	0.722422	0.940827	0.731842
									1.862	0.875	0.859	0.784475											0.522355	0.705873	1.6952	0.7929
									1.402	0.87352	1.112	0.823704											0.460567	0.6668	0.718982	0.715618
									1.557	0.83262	2.729	0.831759											0.736046	0.821239	0.553021	0.656158
									2.119	0.913362	1.297	0.749711											0.679843	0.728174	0.804401	0.748497
									0.822	0.873539	1.153	0.767643											0.829646	0.702958	0.858384	0.716263
									0.779	0.841253	1.993	0.891723											0.44252	0.699418	0.705485	0.655985
									1.671	0.855169	1.025	0.797665											1.10414	0.755169	0.754412	0.734084
									0.878	0.758859	1.145	0.790746											1.08706	0.72412	0.723484	0.745497
									3.213	0.907627	0.972	0.81											1.52352	0.721808	0.634807	0.817056
									1.519	0.907407	2.317	0.852779											0.724187	0.733635	0.714095	0.730558
									1.382	0.780791	1.178	0.738558											1.93081	0.730829	0.53903	0.75664
									1.346	0.802624	0.73	0.764398											0.705034	0.725799	0.759375	0.714884
									1.078	0.822273	1.258	0.839226											0.684044	0.751458	0.613905	0.715991
									0.907	0.762826	2.352	0.884876											0.625309	0.676315	0.564979	0.675389
									1.657	0.846704	1.167	0.828247											0.586974	0.737435	0.568125	0.717222
									0.772	0.766634	1.926	0.859054											1.04599	0.839252	0.648597	0.687711
									1.387	0.805459	0.962	0.752739											1.46646	0.678117	0.669082	0.686431
									1.92	0.871143	1.455	0.873874											0.954665	0.66616	0.958126	0.715339
									1.407	0.769273	1.167	0.73212											0.918573	0.693732	0.5369	0.683654
									1.298	0.7375	1.708	0.851021											0.920442	0.733723	0.676839	0.604813
									1.445	0.808166	1.159	0.83864											0.798124	0.652802	0.649774	0.681631
									0.937	0.849501	1.526	0.838922											0.724363	0.700634	0.670508	0.753267
									1.361	0.829878	0.947	0.789167											1.17698	0.732274	0.627849	0.812483
									2.43	0.899001	1.274	0.740698											1.34367	0.707356	0.513505	0.68067
									1.261	0.797596	1.299	0.842412											0.744901	0.752655	0.615665	0.711542
									1.626	0.855339	2.316	0.858414											0.847938	0.764932	0.631086	0.678383
									2.663	0.901184	2.127	0.81463											0.968567	0.626031	0.478332	0.72668
									1.554	0.817464	1.336	0.817625											0.720486	0.726429	0.657662	0.733202
									0.751	0.773429	0.969	0.826792											0.709265	0.642939	0.682086	0.738549
									2.677	0.89772	2.451	0.836519											1.7224	0.688169	0.660945	0.679542
									1.35	0.892857	1.705	0.844896											0.900302	0.703032	0.795167	0.787238
									1.08	0.830131	1.897	0.876617											1.17644	0.772397	0.879774	0.731199
									1.61	0.855928	2.526	0.817476											0.962568	0.693287	0.63721	0.711019
									1.528	0.829533	1.711	0.890682											1.07534	0.732207	0.439199	0.604057
									1.68	0.862866	2.391	0.883266											0.89249	0.747043	1.01498	0.759403
									1.987	0.853156	1.606	0.803804											1.27761	0.741765	1.05574	0.795021
									1.949	0.775567	1.454	0.829909											0.67928	0.698158	1.07315	0.703808
									1.336	0.83188	1.564	0.893714											2.1737	0.760347	0.599211	0.743746
									1.748	0.87751	2.267	0.851935											1.23711	0.722917	0.816264	0.762186
									1.886	0.778374	2.389	0.861211											1.20161	0.584349	0.50197	0.758039
									0.608	0.735187	1.2	0.833912											1.28556	0.764475	0.510022	0.725075
									2.9	0.878788	2.279	0.889192											1.59617	0.751516	0.605972	0.697793
									1.528	0.856502	1.428	0.826867											1.15789	0.735791	0.685717	0.66857
									1.09	0.856918	1.531	0.807064											0.915935	0.778565	0.437019	0.752497
									1.514	0.755112	0.875	0.730384											1.46385	0.753407	0.386953	0.735993
									1.381	0.825957	0.902	0.784348											1.05466	0.72004	0.63611	0.733116
									1.62	0.824427	2.52	0.84028											0.709175	0.67108	0.524909	0.689262
									1.594	0.856069	1.524	0.866894											0.76547	0.707915	0.322428	0.617402
									0.992	0.821192	1.382	0.906824											0.735267	0.693992	0.643275	0.724948
									2.676	0.862113	1.892	0.787349											0.787282	0.684161	0.508021	0.731416
									0.813	0.758396	1.587	0.834824											0.63621	0.748449	0.662869	0.809068
									1.32	0.818351	1.83	0.818426											0.709624	0.712395	0.864518	0.774412
									0.639	0.781174	2.066	0.807662											0.815405	0.666652	0.754919	0.709409
									1.898	0.833919	2.298	0.836549											0.780297	0.656362	0.499555	0.711844
									0.777	0.850109	1.135	0.872406											1.15459	0.655728	0.589679	0.673651
									1.209	0.856839	1.15	0.763612											1.01202	0.608144	0.835686	0.709374
									1.578	0.868465	0.88	0.806599											1.20425	0.754275	0.843798	0.785069
									1.049	0.833863	0.688	0.751913											0.949851	0.697382	0.731186	0.736455
									1.157	0.780702	0.711	0.795302											1.1204	0.673421	0.896334	0.715664
									0.965	0.796862	2.932	0.886068											1.40119	0.692013	0.482967	0.698858
									0.914	0.793403	1.196	0.795213											0.909098	0.697032	0.688126	0.658177
									0.933	0.815559	2.15	0.780683											1.30229	0.656983	0.596975	0.71783
									1.986	0.87412	1.572	0.809475											1.14295	0.686349	0.480854	0.685817
									2.321	0.91378	2.595	0.856153											0.751876	0.746759	0.813216	0.712895
									1.638	0.811695	2.794	0.885017											0.613801	0.670492	0.976553	0.667906
									1.931	0.908706	0.927	0.810315											0.898887	0.690755	0.649088	0.729907
									0.912	0.832877	2.494	0.85675											0.706117	0.595306	0.553136	0.742819
									0.927	0.800518	1.586	0.785537											0.98156	0.631746	0.720397	0.764937
									1.993	0.91506	1.417	0.827204											0.663445	0.669611	1.10932	0.721043
									0.767	0.790722	1.418	0.864107											0.896192	0.782198	0.956863	0.743457
									1.237	0.840353	0.857	0.740069											0.72953	0.724701	0.697316	0.68946
									1.088	0.880972	0.988	0.797417											0.634004	0.69078	1.51892	0.770904
									0.869	0.733333	1.19	0.84517											0.71641	0.748083	0.553251	0.655785
									1.201	0.83986	0.93	0.802416											0.633402	0.710213	0.820464	0.757908
									1.856	0.826358	0.88	0.824742											1.04988	0.678405	0.847187	0.694708
									1.464	0.826185	1.306	0.773697											2.4737	0.815648	0.713561	0.675229
									1.371	0.863894	1.044	0.805556											1.03221	0.77092	0.816576	0.692516
									0.909	0.813059	1.163	0.814426											0.866137	0.677142	0.721722	0.73905
									0.945	0.831135	2.316	0.829216											1.24736	0.731615	0.748992	0.732573
									0.927	0.811024	1.298	0.83419											0.812041	0.712912	0.8882	0.78054
									1.432	0.872639	2.106	0.824912											0.788898	0.743348	0.738895	0.747071
									1.336	0.806276	1.108	0.731836											1.74589	0.676245	0.568237	0.790823
									2.514	0.90562	1.291	0.849901											1.00369	0.693522	0.776617	0.731487
									1.077	0.796598	1.78	0.82522											1.03239	0.709484	1.64759	0.773545
									1.159	0.85472	1.192	0.835319											1.25651	0.653675	0.653779	0.665709
									1.384	0.796776	1.988	0.821488											1.15735	0.781159	2.18422	0.791111
									1.42	0.870098	1.809	0.858974											0.845155	0.707422	0.587408	0.655137
									1.412	0.859927	1.774	0.765976											1.07712	0.7003	0.86356	0.684514
									1.262	0.85792	2.019	0.885526											2.35828	0.764427	0.851908	0.737491
									1.438	0.807412	1.313	0.8125											0.804875	0.703521	0.509773	0.705381
									0.912	0.819407	3.115	0.863599											1.04763	0.691634	0.674673	0.652338
									1.962	0.828198	2.327	0.83226											0.951726	0.65682	0.740959	0.78157
									1.803	0.888615	1.734	0.826501											2.05073	0.736878	1.32554	0.797278
									1.331	0.771594	1.279	0.818822											0.910078	0.684095	0.602601	0.780642
									1.198	0.845448	2.054	0.845615											1.54757	0.668347	0.861198	0.748036
									1.554	0.832351	2.006	0.843211											0.827957	0.693955	0.663349	0.659455
									0.993	0.82134	1.182	0.840683											0.667558	0.666286	0.727433	0.606187
									1.518	0.874928	1.513	0.841491											1.07273	0.670394	0.58065	0.75691
									1.882	0.841305	1.128	0.805714											0.95333	0.71764	0.659402	0.690427
									1.614	0.787701	1.703	0.840988											0.976618	0.709765	0.620814	0.731369
									1.131	0.846557	1.228	0.803139											1.02422	0.696781	1.18399	0.779067
									1.395	0.880126	1.906	0.861664											1.2153	0.705285	0.499937	0.66839
									1.342	0.845621	0.795	0.794206											0.736132	0.642809	1.57084	0.728669
									2.84	0.89112	2.447	0.833447											1.05448	0.685028	0.755846	0.751646
									0.811	0.806163	2.69	0.866624											1.85377	0.691832	1.28803	0.75186
									1.396	0.866543	2.389	0.877019											1.23505	0.663902	0.966528	0.722638
									0.794	0.742056	0.932	0.831401											1.28259	0.711666	1.39299	0.725426
									1.265	0.779901	0.919	0.77162											1.73639	0.671665	0.739756	0.755653
									1.22	0.80316	2.213	0.848218											2.03703	0.718781	0.986929	0.690819
									0.927	0.837398	1.147	0.856609											1.01429	0.723406	0.735353	0.752256
									1.147	0.805478	1.404	0.820093											1.21478	0.692761	1.78947	0.789981
									1.274	0.848202	0.955	0.793849											0.943665	0.730959	0.608802	0.696075
									1.492	0.818431	2.565	0.805338											1.16283	0.676142	1.00514	0.763562
									1.431	0.812606	2.147	0.79548											1.31009	0.741153	0.645745	0.672104
									1.081	0.879577	0.704	0.755365											1.4161	0.764187	0.889489	0.754698
									0.992	0.80194	1.312	0.810377											0.969553	0.66174	0.451634	0.602578
									1.605	0.868977	1.119	0.817385											0.790752	0.693202	0.710968	0.671667
									1.104	0.853168	1.769	0.849256											0.844025	0.740991	0.718362	0.690931
									0.717	0.705709	1.559	0.834136											0.987251	0.696497	0.514991	0.667361
									1.527	0.843181	0.768	0.793388											1.03455	0.705681	0.668225	0.782126
									2.103	0.852452	1.672	0.789797											1.38887	0.72216	0.567003	0.685141
									1.2	0.87146	2.601	0.833921											1.43175	0.740139	0.666986	0.764638
									1.286	0.819108	0.701	0.676641											1.23505	0.687447	0.638208	0.741579
									1.273	0.832026	0.727	0.776709											1.20372	0.716131	0.745072	0.765829
									1.531	0.856743	1.349	0.828624											0.80099	0.615989	0.914126	0.742951
									2.428	0.84072	1.392	0.829559											0.954131	0.67657	1.37736	0.794916
									1.135	0.784924	2.241	0.849507											1.29739	0.714716	1.59936	0.832465
									1.21	0.803453	1.748	0.84731											0.616388	0.597371	0.599742	0.755452
									1.88	0.856882	1.712	0.816015											1.26106	0.716932	0.683392	0.806875
									2.188	0.825972	1.608	0.866379											0.918642	0.756876	0.678906	0.690429
									1.328	0.815725	1.53	0.864895											0.762721	0.709948	0.94326	0.744717
									1.392	0.850336	0.96	0.723436											1.25853	0.778423	0.689697	0.77284
									0.991	0.762308	0.942	0.878731											0.943193	0.728371	1.39345	0.75561
									1.688	0.889357	2.036	0.763691											1.62894	0.717245	0.98428	0.680734
									1.594	0.841161	2.167	0.85517											0.886478	0.679943	1.17373	0.755829
									2.351	0.870418	2.519	0.841349											1.63479	0.749654	0.810864	0.756893
									2.048	0.872975	2.089	0.825039											1.82992	0.762881	0.744132	0.758713
									1.591	0.827784	0.964	0.842657											1.56922	0.674898	0.635208	0.626377
									2.271	0.830651	1.429	0.843566											1.30911	0.756009	1.02048	0.826269
									2.043	0.840741	1.109	0.863035											1.36343	0.715989	0.618759	0.742182
									1.031	0.834818	2.123	0.836815											1.01504	0.615211	1.14295	0.751237
									2.575	0.936704	1.09	0.850898											1.50629	0.697962	0.745158	0.743313
									1.544	0.866929	1.675	0.865186											1.23247	0.737566	0.836676	0.793134
									1.012	0.83087	1.098	0.760915											1.7759	0.71739	0.819455	0.736192
									1.067	0.770954	0.808	0.767331											0.859348	0.701089	0.939473	0.715253
									1.086	0.816541	1.341	0.832402											0.889919	0.699831	0.675239	0.695925
									1.186	0.83345	1.293	0.831511											0.857123	0.695453	0.608488	0.680917
									1.186	0.819061	2.46	0.833333											0.739067	0.758332	0.631288	0.757139
									0.704	0.720573	0.797	0.697898											1.12272	0.716208	0.716943	0.715849
									2.101	0.876147	1.925	0.825472											0.806614	0.67217	1.59577	0.790817
									1.663	0.868407	1.421	0.84533											0.499555	0.76835	0.906995	0.78593
									2.172	0.866374	0.889	0.769697											1.46906	0.707107	0.490553	0.6682
									1.17	0.757282	0.724	0.843823											0.910428	0.658787	1.40663	0.815972
									1.395	0.883471	2.226	0.844461											0.726907	0.745855	0.755003	0.738992
									1.21	0.815364	1.082	0.79442											0.480059	0.592263	0.93533	0.750157
									0.88	0.832545	0.937	0.788721											0.845155	0.666205	0.739411	0.745848
									1.706	0.829767	0.701	0.767798											1.90593	0.7532	0.83294	0.771783
									1.009	0.800159	1.478	0.808976											1.37041	0.757877	0.909098	0.766434
									1.154	0.787176	1.292	0.86828											0.692828	0.68013	0.721016	0.731906
									1.238	0.86634	0.748	0.769547											1.06451	0.733324	0.714006	0.74162
									1.08	0.833333	1.242	0.799228											1.36483	0.699498	0.576689	0.738832
									1.576	0.896473	0.743	0.840498											0.879846	0.623097	0.793243	0.725121
									1.585	0.820818	1.139	0.792624											0.791476	0.676202	1.53269	0.709611
									1.185	0.901826	1.626	0.924915											1.77554	0.733185	0.586974	0.766482
									1.063	0.786825	0.869	0.854474											1.11132	0.740286	0.963493	0.789744
									1.528	0.864743	3.2	0.834855											1.51682	0.709763	0.684788	0.720688
									2.009	0.878059	2.568	0.908062											0.782578	0.687383	0.963757	0.796114
									2.063	0.86973	0.926	0.788756											0.857123	0.794538	0.567789	0.731415
									1.004	0.867012	1.961	0.834823											0.691909	0.788997	2.26014	0.789721
									1.285	0.870596	1.555	0.872126											0.721634	0.650016	0.918642	0.812907
									1.024	0.846981	2.123	0.850902											0.689143	0.60472	0.672499	0.79135
									1.061	0.850842	0.833	0.823123											0.860828	0.69934	1.48929	0.769359
									1.975	0.842577	2.253	0.873594											0.784203	0.728539	1.00083	0.784277
									1.478	0.890898	1.761	0.870489											0.675144	0.59863	1.37644	0.776006
									1.461	0.794022	0.922	0.833635											1.05791	0.704109	1.63206	0.766254
									1.246	0.850512	2.029	0.86414											0.943395	0.713775	0.54537	0.762296
									1.33	0.786517	1.07	0.806938											0.901998	0.70683	1.36529	0.806818
									2.551	0.820521	1.134	0.769857											0.963427	0.788006	0.93988	0.783917
									2.532	0.883153	1.474	0.905405											1.45993	0.719239	1.07089	0.85022
									0.95	0.808511	1.092	0.853125											1.23402	0.741713	0.993038	0.751883
									0.633	0.811538	0.951	0.804569											0.999746	0.709825	1.34414	0.839594
									2.517	0.840962	1.406	0.832938											1.07463	0.767189	1.49696	0.78378
									1.153	0.781695	2.219	0.883712											0.849663	0.69407	0.955065	0.815208
									1.603	0.871196	0.703	0.792559											1.71164	0.703145	0.756351	0.688982
									1.702	0.763229	2.055	0.87484											1.8678	0.776185	0.973811	0.767317
									1.064	0.800602	1.668	0.84285											1.72977	0.782189	0.550483	0.743795
									1.255	0.767584	1.287	0.85515											1.20425	0.741067	1.08213	0.781726
									0.749	0.793432	1.163	0.837896											0.793885	0.598046	0.600378	0.70487
									2.361	0.864835	1.518	0.883586											0.949449	0.685198	0.660463	0.756213
									1.324	0.87048	1.119	0.832589											1.15514	0.775856	1.67822	0.758185
									1.38	0.821429	1.579	0.801523											1.57529	0.719966	1.49611	0.818829
									2.476	0.859126	1.604	0.855011											2.04794	0.769567	1.07386	0.801177
									0.755	0.758032	0.888	0.855491											0.779317	0.717718	1.72683	0.758105
									0.649	0.736663	2.826	0.895721											1.05067	0.681638	0.468787	0.665938
									2.246	0.844044	1.041	0.922872											1.08758	0.70017	0.670603	0.748696
									2.459	0.889975	1.038	0.808411											1.77948	0.765058	0.729705	0.821621
									1.016	0.773212	1.166	0.888043											2.29868	0.774186	1.58857	0.790719
									1.449	0.833237	0.783	0.805556											1.56556	0.725129	1.16938	0.751247
									0.794	0.789264	2.197	0.923886											0.965407	0.656192	0.603867	0.678838
									2.625	0.87007	1.382	0.829532											0.839108	0.625814	0.69622	0.803413
									1.401	0.774033	1.871	0.863007											0.917394	0.595814	0.501717	0.726279
									1.287	0.89313	0.853	0.861616											1.62385	0.784625	0.758788	0.806976
									1.128	0.813266	1.256	0.82523											0.87331	0.75458	1.30668	0.77791
									2.311	0.879376	1.085	0.782264											0.836067	0.664853	0.805824	0.756438
									1.615	0.842023	0.978	0.794476											1.11361	0.716927	0.810393	0.641345
									1.583	0.792689	1.498	0.839686											1.17914	0.706622	0.653097	0.789906
									0.921	0.759275	0.99	0.847603											1.14574	0.717625	1.45644	0.803889
									1.215	0.793599	1.929	0.821201											0.815249	0.707107	0.6621	0.773474
									0.939	0.822962	0.984	0.849741											0.816809	0.618	0.412592	0.621804
									0.905	0.768251	1.669	0.837431											2.15252	0.780082	0.536188	0.78902
									1.099	0.795224	1.044	0.85644											1.57933	0.765278	1.02769	0.75247
									1.457	0.840739	1.068	0.853717											0.57092	0.633943	0.796767	0.793589
									1.434	0.832753	0.717	0.781897											0.883457	0.631324	0.990599	0.83439
									1.359	0.770845	1.677	0.906977											0.884897	0.70425	1.53849	0.783153
									1.711	0.81167	1.109	0.87117											0.996557	0.711453	1.01579	0.723777
									1.158	0.782432	0.987	0.815029											0.931853	0.588083	0.753146	0.745031
									1.152	0.772636	1.179	0.875278											1.52101	0.683268	0.919473	0.746043
									0.789	0.733271	0.82	0.856844											0.934581	0.694076	0.79236	0.752503
									1.671	0.809985	1.053	0.89313											1.21478	0.677369	0.465379	0.671176
									1.597	0.780166	1.178	0.825508											1.26157	0.774659	0.963163	0.715805
									0.989	0.789936	0.652	0.829517											1.34272	0.773614	1.3096	0.752782
									1.971	0.822278	0.745	0.838964											2.0292	0.765144	0.894485	0.795787
									0.81	0.769962	1.273	0.860717											2.03421	0.863968	0.545954	0.726531
									1.226	0.859145	1.026	0.858577											0.989506	0.764426	1.20847	0.742235
									1.408	0.831169	0.743	0.812022											1.10385	0.791138	1.63673	0.826777
									1.154	0.782904	1.206	0.885463											2.31166	0.785509	1.25245	0.801041
									1.456	0.839677	1.495	0.869186											1.07226	0.755034	1.1061	0.784079
									1.662	0.810732	1.377	0.854749											2.17195	0.823378	0.874039	0.777988
									1.556	0.856357	1.577	0.790873											1.27462	0.767177	1.9912	0.792912
									1.143	0.785027	1.646	0.893594											1.39618	0.73945	1.47339	0.712349
									1.057	0.770408	0.776	0.75121											1.15569	0.760867	0.703588	0.746231
									0.895	0.749581	1.035	0.837379											1.11761	0.72938	1.18184	0.793559
									1.488	0.767802	1.272	0.867076											2.06496	0.781179	0.664116	0.752277
									1.495	0.755814	1.222	0.787879											1.58094	0.7238	0.536663	0.663126
									1.296	0.715627	1.128	0.867692											1.31445	0.784665	0.502604	0.708806
									2.096	0.781215	0.918	0.832276											1.02304	0.756587	0.589031	0.722655
									1.522	0.806571	0.834	0.860681											1.59975	0.810736	0.529858	0.676997
									2.048	0.830832	0.909	0.821138											0.664691	0.749325	0.546303	0.742388
									2.961	0.84215	1.021	0.838948											1.02428	0.761494	0.731273	0.786716
									1.112	0.773296	0.922	0.850554											1.02738	0.724121	0.65679	0.744039
									1.455	0.748072	1.068	0.839623											0.894912	0.724295	0.673634	0.736355
									1.15	0.805886	1.174	0.817549											0.862306	0.741556	0.462222	0.683483
									1.687	0.765426	0.756	0.833517											0.658919	0.747674	0.658339	0.780698
									1.71	0.788745	1.565	0.917351											1.37736	0.819989	1.02707	0.826108
									1.138	0.801408	1.168	0.813937											1.72055	0.734468	0.669177	0.730761
									0.989	0.706429	1.51	0.866322											1.02366	0.728206	0.470955	0.707615
									2.056	0.845742	1.614	0.896169											0.94407	0.71743	0.951258	0.699857
									0.962	0.767757	0.697	0.828775											1.13401	0.720982	1.04319	0.786702
									2.552	0.82296	1.252	0.817766											0.924996	0.768109	0.839259	0.774765
									1.069	0.708416	1.327	0.816113											1.14184	0.809155	0.605342	0.77296
									2.258	0.815751	0.875	0.790425											0.823021	0.724688	0.72489	0.75277
									1.094	0.805004	0.824	0.753199											1.04459	0.78128	0.540092	0.647408
									1.785	0.82296	2.165	0.893152											0.855636	0.798862	0.812903	0.769542
									1.003	0.684175	1.664	0.774314											1.04824	0.80674	0.880786	0.748688
									1.441	0.821083	0.903	0.789336											1.12386	0.784465	0.712221	0.769858
									1.961	0.774181	1.239	0.845157											1.19736	0.787429	0.465379	0.655811
									1.15	0.807018	1.014	0.865927											0.940692	0.711471	0.604184	0.704044
									1.305	0.87058	1.375	0.852978											1.10154	0.727024	0.510022	0.73362
									1.03	0.816165	1.293	0.878994											1.22313	0.726861	0.708816	0.744507
									1.136	0.805103	0.965	0.847234											1.01051	0.744223	1.21425	0.781099
									1.693	0.776606	1.502	0.831672											1.39937	0.741668	0.592695	0.734794
									0.884	0.746622	0.952	0.810213											1.71795	0.727063	0.714274	0.738206
									2.827	0.852276	0.82	0.820821											1.06451	0.702972	0.862306	0.75372
									1.276	0.809131	1.953	0.840723											1.18721	0.731819	0.866578	0.798944
									1.092	0.759388	1.29	0.878148											1.07936	0.792738	0.643671	0.707705
									1.151	0.79654	1.084	0.832565											0.897044	0.669973	0.660174	0.749159
									0.883	0.785587	1.898	0.848458											1.11476	0.677553	0.994383	0.8116
									1.141	0.845812	1.9	0.813008											1.21687	0.722653	0.712489	0.76381
									1.415	0.80811	2.175	0.822306											0.995918	0.709387	0.538557	0.684001
									1.351	0.795174	1.28	0.867797											1.23659	0.748793	0.876076	0.805611
									1.35	0.741758	1.298	0.847812											1.04945	0.659132	0.937642	0.803698
									0.721	0.805587	1.138	0.811119											1.03295	0.702718	0.632195	0.757395
									1.221	0.700918	1.32	0.833333											0.744217	0.691771	0.844779	0.717421
									1.453	0.84037	1.424	0.834212											0.815249	0.716432	0.866945	0.726959
									1.471	0.851766	0.759	0.843333											0.979157	0.699712	0.546536	0.683752
									0.885	0.784574	1.341	0.846591											0.934581	0.704544	0.757192	0.720471
									1.659	0.775234	1.038	0.783396											1.46602	0.744548	0.5045	0.656227
									1.483	0.805103	0.929	0.8723											2.14896	0.802638	0.736737	0.741903
									1.297	0.786061	0.948	0.743529											0.836828	0.701705	0.924376	0.765247
									1.075	0.750174	1.166	0.767105											1.46168	0.726069	0.600166	0.741378
									2.319	0.863366	0.816	0.701031											1.028	0.676426	0.532973	0.723168
									1.062	0.778592	1.538	0.874858											1.56922	0.784309	1.00502	0.698272
									1.129	0.777013	1.118	0.83997											0.940015	0.730648	0.758116	0.716412
									1.274	0.832136	1.212	0.830706											0.844402	0.641218	0.934718	0.78732
									0.663	0.775439	1.134	0.875676											1.09633	0.767396	0.775879	0.731205
									1.438	0.811971	1.13	0.815884											1.31251	0.717797	0.593875	0.713314
									1.79	0.835278	1.891	0.86505											1.09923	0.708602	0.560681	0.738753
									1.371	0.825406	0.854	0.775658											0.771105	0.684745	0.499427	0.721044
									1.08	0.794118	1.743	0.845706											1.17968	0.713002	0.831409	0.780324
									0.964	0.850088	1.407	0.853762											1.86814	0.727287	1.57852	0.812699
									1.49	0.83991	1.048	0.822606											0.931853	0.67028	0.766966	0.775605
									1.072	0.865913	1.188	0.807614											0.81055	0.722315	1.28159	0.806148
									1.816	0.834559	0.938	0.890788											1.29984	0.71829	0.780134	0.768005
									1.049	0.780506	0.735	0.823991											0.994639	0.719482	0.588707	0.770503
									1.308	0.869681	0.964	0.847845											1.25702	0.6994	0.7357	0.760246
									2.11	0.85529	0.605	0.812081											1.93542	0.784772	0.87876	0.751123
									1.441	0.786143	1.647	0.842455											0.768624	0.631368	1.15844	0.776959
									1.94	0.853498	1.506	0.813614											1.19096	0.725922	0.584365	0.78866
									1.417	0.860352	2.037	0.876506											1.15624	0.769773	0.703769	0.776054
									1.582	0.768707	1.198	0.818865											2.3878	0.867237	0.535713	0.778614
									2.024	0.813505	1.488	0.86562											1.24634	0.739486	1.02738	0.795199
									1.086	0.859857	0.925	0.80786											1.24685	0.745322	1.31687	0.750207
									1.834	0.783426	1.392	0.842615											2.38593	0.798569	1.00843	0.780234
									0.99	0.735513	0.894	0.811252											1.05006	0.750135	0.69558	0.756498
									1.071	0.784041	0.555	0.828358											0.833016	0.709388	0.703769	0.757796
									1.375	0.820406	1.736	0.8728											1.37644	0.740451	0.944744	0.83023
									2.756	0.831122	1.309	0.856115											1.69933	0.741497	0.689051	0.764036
									2.245	0.85818	1.262	0.881901											1.05067	0.709772	1.42283	0.773867
									2.007	0.858793	0.748	0.78903											1.59936	0.739873	0.868779	0.743283
									1.744	0.882591	0.714	0.840989											2.35477	0.785346	0.730489	0.78185
									1.078	0.811136	1.31	0.771951											1.00988	0.755861	0.83072	0.722257
									1.212	0.828435	1.241	0.872714											1.1813	0.772625	0.71969	0.743197
									1.639	0.818273	1.309	0.845607											1.05067	0.706699	0.436436	0.640469
									0.948	0.807496	0.969	0.8621											0.926371	0.760293	1.39207	0.806663
									1.445	0.799668	1.313	0.847644											1.2671	0.794438	0.750605	0.794734
									1.577	0.802953	1.616	0.813696											1.94592	0.745788	0.528535	0.692278
									1.34	0.804322	1.235	0.872792											1.02614	0.716037	0.768624	0.721842
									1.513	0.829041	1.141	0.785813											0.937302	0.699048	0.869291	0.802663
									1.119	0.82583	0.691	0.807243											0.884177	0.718308	0.796127	0.685614
									1.209	0.832072	1.333	0.81231											0.929801	0.747254	0.782252	0.715036
									3.349	0.877391	1.229	0.842358											0.833016	0.651756	0.864444	0.772887
									0.881	0.736622	3.77	0.888104											0.974661	0.789499	0.849663	0.701865
									1.967	0.800244	0.775	0.830654											1.03848	0.825479	1.69745	0.796844
									2.541	0.850971	0.812	0.793744											1.48114	0.810791	0.963427	0.705415
									0.832	0.821323	0.783	0.794924											0.65582	0.786347	1.0669	0.687944
									1.032	0.823623	1.321	0.769365											0.685159	0.739069	0.717209	0.750639
									1.954	0.840069	0.715	0.819954											2.44314	0.824568	1.63906	0.862254
									1.594	0.827193	1.496	0.812161											0.670318	0.740718	0.892775	0.76063
									1.605	0.8025	0.923	0.799827											0.773166	0.744783	0.722515	0.694925
									1.553	0.816509	2.413	0.834659											0.591297	0.77892	0.726031	0.780272
									1.283	0.841311	2.04	0.864041											0.878108	0.704263	1.00483	0.707107
									1.362	0.780516	0.919	0.88621											1.14518	0.80084	0.46933	0.687515
									1.55	0.838745	1.042	0.791793											1.02416	0.782909	0.92843	0.709997
									1.338	0.850604	0.937	0.85649											0.852057	0.778429	0.750181	0.799205
									1.725	0.758242	1.038	0.803406											0.430118	0.73413	0.629267	0.726029
									1.264	0.79597	0.941	0.780913											0.725593	0.802922	0.831486	0.727134
									1.158	0.691756	1.309	0.846701											0.613905	0.729509	1.06272	0.717079
									1.168	0.831317	0.943	0.736144											0.716765	0.7451	0.913917	0.66286
									1.116	0.703657	1.064	0.794623											0.738119	0.760166	0.425206	0.691458
									1.17	0.799727	1.372	0.858036											0.574588	0.657613	0.573146	0.735446
									1.311	0.838772	1.381	0.839514											1.84102	0.796311	0.691909	0.793609
									1.143	0.863946	1.647	0.886437											0.698867	0.650369	1.46863	0.744161
									1.084	0.871383	0.999	0.831807											0.599211	0.761348	0.536425	0.714253
									1.638	0.852681	1.682	0.866564											1.17752	0.768273	0.793885	0.70462
									0.772	0.777442	1.361	0.861392											1.20478	0.689202	1.11704	0.704238
									0.809	0.742883	2.499	0.852901											0.661619	0.780683	2.12363	0.778053
									1.957	0.84792	1.6	0.846113											0.92217	0.681754	1.36343	0.680586
									1.425	0.853293	0.916	0.796522											0.725943	0.685153	0.690988	0.609032
									1.112	0.824926	1.148	0.811307											0.725768	0.720511	0.901998	0.738707
									1.088	0.835637	0.943	0.772318											1.41925	0.757092	0.858607	0.705585
									2.969	0.89888	1.191	0.830544											1.2494	0.768108	0.768624	0.747687
									0.971	0.82568	1.311	0.850746											0.683671	0.693043	0.656014	0.739544
									0.7	0.756757	3.138	0.894272											0.638008	0.64273	0.825338	0.787357
									1.4	0.802752	1.658	0.841197											0.58578	0.722694	0.781764	0.747522
									0.734	0.829379	1.262	0.776138											0.583275	0.709501	1.74005	0.806497
									1.045	0.818966	1.579	0.837666											0.596869	0.72679	0.691909	0.660834
									2.004	0.848434	1.761	0.822513											0.652121	0.727024	0.678906	0.675218
									1.331	0.838689	1.498	0.861415											0.514496	0.677078	0.974596	0.709728
									1.255	0.75785	1.408	0.877259											0.451493	0.600015	0.463872	0.725589
									1.646	0.789827	0.641	0.762188											0.532614	0.757973	0.662773	0.688405
									1.279	0.819347	1.573	0.861446											0.758452	0.660379	1.28655	0.742191
									0.866	0.747841	1.688	0.810759											0.658533	0.762319	0.547002	0.700432
									1.209	0.783539	0.811	0.76945											0.686273	0.686579	0.719867	0.731316
									0.829	0.805637	2.681	0.888042											1.05653	0.785468	1.67973	0.712676
									2.443	0.845036	2.434	0.900814											0.464147	0.569768	1.20742	0.813777
									0.624	0.679739	2.154	0.83618											1.38152	0.739649	1.12782	0.67371
									1.332	0.861021	1.007	0.811442											1.15789	0.699509	0.576468	0.628852
									1.363	0.82556	2.051	0.856725											0.733967	0.761099	1.45118	0.720066
									0.793	0.746704	0.824	0.833165											0.760045	0.782748	0.398942	0.662266
									1.379	0.821322	0.862	0.810913											0.87564	0.662753	0.573146	0.647172
									1.427	0.79366	0.607	0.760652											0.51462	0.673905	1.29935	0.75699
									1.156	0.84318	1.305	0.828571											0.525757	0.742587	1.417	0.742822
									1.511	0.862935	0.87	0.819981											0.585454	0.712554	0.799479	0.646518
									1.206	0.847505	0.985	0.844768											0.63671	0.789207	0.809764	0.739398
									0.703	0.789001	0.99	0.865385											0.570139	0.653722	1.16064	0.733027
									1.59	0.842161	0.91	0.837167											0.627849	0.630625	0.824567	0.743117
									1.621	0.827041	1.71	0.857573											0.637809	0.666748	1.19416	0.744433
									1.212	0.804247	1.276	0.789604											0.643869	0.690348	0.494431	0.746004
									1.943	0.812971	1.377	0.835052											0.532853	0.697021	0.964088	0.746208
									1.037	0.706403	2.063	0.852479											0.822324	0.683152	0.539974	0.686435
									1.149	0.789691	1.046	0.788244											0.841986	0.706346	0.841381	0.734715
									1.141	0.739469	1.639	0.818273											0.552675	0.741519	0.83072	0.766715
									1.217	0.854635	1.061	0.824398											0.643572	0.76305	0.620095	0.735017
									1.042	0.642813	1.073	0.850238											0.809922	0.810695	0.57092	0.726523
									1.958	0.856518	0.83	0.721739											0.724802	0.681722	0.578673	0.759444
									1.696	0.828935	1.057	0.763728											0.606917	0.764644	0.761133	0.735105
									1.287	0.83301	0.75	0.729572											0.506515	0.722136	1.02054	0.819508
									0.865	0.7914	1.351	0.84122											0.568573	0.745535	0.987574	0.710594
									0.951	0.755962	1.385	0.815185											0.434682	0.732869	1.4143	0.75514
									2.328	0.864143	0.835	0.806763											0.535594	0.743561	0.676087	0.730365
									0.974	0.741813	0.842	0.835317											0.519667	0.719599	0.603446	0.677546
									0.966	0.78282	1.246	0.822985											0.435414	0.669395	0.342254	0.688641
									1.192	0.866279	1.657	0.789424											0.852057	0.593458	0.408405	0.659709
									1.289	0.826812	1.01	0.738304											0.761635	0.666374	0.702863	0.680446
									1.67	0.862158	1.151	0.869992											1.36389	0.676858	0.796287	0.738145
									1.487	0.869082	1.522	0.816524											0.673067	0.603748	0.690066	0.698749
									1.06	0.817901	0.781	0.74952											0.629166	0.669556	0.472035	0.69433
									1.179	0.79716	1.137	0.822721											0.752892	0.638508	0.684509	0.700009
									1.248	0.832555	1.954	0.822045											0.713203	0.669794	0.881292	0.819187
									0.952	0.775876	1.991	0.899277											0.546886	0.689639	1.12216	0.77444
									0.957	0.84243	0.891	0.684858											0.500573	0.735902	0.986929	0.804152
									0.936	0.803433													0.54021	0.745229	0.88777	0.787159
									1.034	0.846847													0.502604	0.712788	0.930485	0.806285
									1.825	0.804319													0.631288	0.737351	0.56419	0.734818
									1.426	0.850835													0.464695	0.681471	0.620095	0.744398
									1.888	0.810648													0.560908	0.745926	0.652121	0.648579
									2.014	0.887225													0.602178	0.738856	0.503363	0.749765
									1.327	0.839342													0.666317	0.737157	0.594946	0.735429
									0.909	0.778253													0.895054	0.728063	0.671362	0.755624
									0.729	0.806416													0.450505	0.695848	0.864518	0.72951
									1.419	0.833725													0.657178	0.703641	1.12272	0.577253
									0.969	0.848511													0.491331	0.676736	1.47813	0.713582
									0.837	0.829534													0.532016	0.722464	0.529257	0.715282
									1.27	0.844415													0.813294	0.745476	0.795487	0.763315
									1.08	0.829493													0.731795	0.722651	0.504627	0.723575
									2.292	0.906287													1.80117	0.684511	0.926371	0.762914
									0.98	0.868794													0.522964	0.609453	0.461119	0.721283
									1.041	0.870401													0.532614	0.705446	0.384312	0.669236
									1.764	0.856727													0.508898	0.674335	1.07641	0.678793
									1.178	0.887717													0.642978	0.800113	0.768624	0.786554
									0.754	0.84058													0.597295	0.678027	0.833016	0.728472
									0.739	0.853349													0.491072	0.688199	0.765304	0.699172
									1.437	0.887585													0.550251	0.697351	0.901292	0.809755
									1.79	0.898144													0.757276	0.698514	0.918087	0.727445
									1.537	0.824571													0.931032	0.648866	1.13401	0.711523
									1.809	0.872228													1.33845	0.734502	0.925684	0.693088
									1.27	0.837179													1.00521	0.688325	0.887052	0.727711
									0.727	0.838524													0.621941	0.704675	0.677967	0.701303
									1.834	0.868371													0.855636	0.761608	0.836067	0.697023
									1.74	0.829361													0.529257	0.656082	0.824567	0.689267
									1.135	0.861153													0.613074	0.658344	0.34779	0.594273
									2.757	0.863722													0.77226	0.727342	1.08817	0.850065
									1.165	0.841155													0.558747	0.744564	0.745926	0.721705
									1.33	0.847134													1.77231	0.804889	0.526846	0.69602
									0.943	0.838222													0.964088	0.829085	0.438474	0.660618
									1.305	0.871743													0.741561	0.777972	0.633301	0.771663
									0.927	0.848124													0.774318	0.657583	0.80345	0.671915
									1.39	0.816207													0.910358	0.654603	0.573146	0.686778
									1.43	0.850178													0.845306	0.677401	1.66871	0.795841
									0.962	0.777688													0.753484	0.629568	0.971979	0.700993
									1.042	0.819827													0.709086	0.743382	0.720751	0.736093
									1.057	0.850362													0.592802	0.697814	0.699231	0.726772
									0.932	0.871028													0.881798	0.734498	0.42819	0.668734
									1.133	0.790098													0.881942	0.73397	0.782578	0.739402
									1.386	0.876106													0.665265	0.711573	0.833169	0.770355
									1.505	0.826015													0.546187	0.74976	0.739325	0.723382
									1.404	0.873134													1.52853	0.740109	0.902562	0.754465
									1.968	0.870411													1.23556	0.765708	0.883529	0.754147
									1.429	0.851102													1.0021	0.739304	0.600272	0.744043
									1.396	0.839952													0.511394	0.616799	0.615251	0.764857
									1.418	0.892385													0.679281	0.741907	0.782334	0.747458
									2.228	0.8912													0.720927	0.655917	0.759039	0.800754
									1.509	0.886083													0.509523	0.689655	0.553826	0.744429
									1.986	0.896614													0.533211	0.63419	0.63721	0.712489
									1.404	0.847314													1.1683	0.701244	0.517826	0.681987
									0.818	0.777567													0.7401	0.760156	0.555318	0.718546
									1.973	0.878451													0.704492	0.617886	0.889632	0.640968
									2.588	0.875507													1.09981	0.746886	1.1312	0.711187
									1.211	0.901042													0.9438	0.743669	1.12261	0.674442
									0.982	0.788122													0.659885	0.690162	0.688219	0.675149
									1.523	0.858996													0.637709	0.674334	0.929869	0.704827
									0.935	0.847688													0.487298	0.634329	0.98182	0.801006
									0.985	0.853553													0.625411	0.721764	0.668702	0.747404
									0.884	0.766031													1.06176	0.78577	0.886981	0.727029
									2.209	0.83327													0.733099	0.732865	0.552215	0.782444
									1.216	0.919123													0.718185	0.752343	1.05079	0.756328
									1.769	0.812586													0.800911	0.79812	1.05863	0.674102
									1.136	0.860606													0.587516	0.687241	0.464147	0.664662
									1.285	0.777845													1.1312	0.736453	0.605236	0.722135
									0.846	0.793621													1.3413	0.781091	0.564979	0.684095
									0.727	0.76046													0.667177	0.756486	0.911406	0.699063
									1.471	0.877685													0.683299	0.674049	0.750181	0.727384
									2.338	0.87664													0.999938	0.810651	0.739842	0.74969
									0.729	0.85967													0.688589	0.732318	0.568797	0.671455
									0.912	0.833638													1.71573	0.830876	0.432774	0.75494
									1.636	0.830879													1.18507	0.783237	0.743789	0.758967
									1.291	0.795441													0.69062	0.708337	0.628458	0.773177
									1.074	0.798513													1.15459	0.7566	0.737428	0.689416
									0.711	0.775354													0.897398	0.728743	0.641987	0.636539
									1.488	0.802156													0.945687	0.769573	0.619376	0.71945
									0.894	0.857965													1.37505	0.77838	0.683485	0.659291
									1.7	0.904737															0.468107	0.670772
									1.299	0.792073															0.493658	0.631598
									1.821	0.815495													0.900232	0.767337	0.326529	0.652144
									2.617	0.878778													0.720309	0.70863	0.889632	0.73745
									3.075	0.897025													0.841381	0.649501	0.892989	0.731641
									1.6	0.836383													0.940963	0.67795	0.685345	0.696611
									0.701	0.855922													1.07077	0.70302	0.669272	0.648779
									1.8	0.889328													0.622043	0.712699	0.774071	0.740857
									0.795	0.843949													0.534523	0.712123	0.683205	0.742146
									1.853	0.852738													0.654168	0.74782	0.563625	0.691751
									1.209	0.913142													0.808899	0.743758	0.488342	0.652221
									1.298	0.846706													0.555089	0.677645	0.529738	0.636804
									1.01	0.809944													0.772013	0.649979	0.753315	0.730466
									1.346	0.832921													0.50349	0.666054	0.798204	0.71479
									1.835	0.846402													0.646631	0.757976	0.826802	0.767651
									0.554	0.755798													0.883601	0.681834	0.638407	0.72428
									2.499	0.831337													0.90545	0.763358	0.658823	0.761551
									2.337	0.894717													0.726557	0.700963	0.606602	0.685116
									1.498	0.844896													1.19736	0.787646	0.431743	0.667376
									0.854	0.811016													0.943463	0.795046	0.771765	0.686055
									1.224	0.855944
									1.296	0.809494
									1.214	0.836664
									1.158	0.877273
									1.054	0.825372
									0.774	0.81388
									0.977	0.845887
									1.124	0.841317
									1.031	0.890328
									1.333	0.782736
									1.815	0.819413
									1.504	0.842577
									1.345	0.868863
									1.279	0.796885
									0.901	0.849199
									0.807	0.824311
									1.095	0.803375
									0.746	0.8234
									1.434	0.874924
									1.218	0.836538
									1.031	0.872989
									1.244	0.855571
									1.811	0.846657
									0.896	0.863198
									2.222	0.860907
									1.911	0.847074
									1.379	0.878904
									0.646	0.786845
									1.263	0.849361
									0.71	0.796857
									1.61	0.822688
									1.941	0.831976
									2.391	0.825052
									1.121	0.80186
									1.605	0.838558
									1.252	0.856361
									1.473	0.865452
									1.241	0.816985
									1.295	0.787713
									1.591	0.852169
									1.973	0.851532
									1.126	0.875583
									1.612	0.845307
									1.365	0.8159
									1.131	0.884977
									1.381	0.81523
									2.962	0.904704
									2.073	0.843026
									1.285	0.826898
									0.986	0.753823
									1.66	0.906608
									0.721	0.774436
									1.226	0.88138
									1.477	0.892447
									1.219	0.853044
									0.968	0.82243
									1.303	0.862343
									1.55	0.841477
									0.719	0.777297
									0.961	0.812342
									1.939	0.87817
									1.849	0.856019
									0.986	0.845626
									1.601	0.908111
									2.795	0.906879
									0.942	0.813472
									1.256	0.819309
									1.151	0.795989
									0.839	0.794508
									2.183	0.911482
									1.363	0.88106
									1.02	0.825243
									1.404	0.827342
									0.829	0.753636
									2.19	0.924051
									0.886	0.790366
									0.56	0.79096
									1.833	0.849004
									1.2	0.82361
									1.15	0.846834
									1.035	0.790076
									1.16	0.880121
									0.747	0.804957
									1.338	0.925311
									0.575	0.705521
									1.449	0.790507
									1.361	0.875804
									1.857	0.870605
									0.794	0.851931
									0.868	0.805942
									1.394	0.873434
									1.228	0.841672
									2.76	0.888317
									1.021	0.800157
									0.735	0.746193
									0.972	0.83006
									1.036	0.801858
									1.271	0.805961
									1.77	0.855899
Fig 2 D			Fig 2 E			Fig 2 F			Fig 2 G					Fig 2 I			Fig 2 J			Fig 2 K			Fig 2 L					Fig 2 N
Unmyelinated axons at P31			Myelin pathology at P31			Mean g-ratios			CTRL (n=5)		Cmtm5 cKO (n=4)			Unmyelinated axons at P76			Myelin pathology at P76			Mean g-ratios			CTRL		cKO			CA2 positive cells [#]
Cmtm5fl/fl (n=4)	Cmtm5 cKO (n=4)		Cmtm5fl/fl (n=4)	Cmtm5 cKO (n=4)		CTRL (n=5)	Cmtm5 cKO (n=4)		Diameter	g-ratio	Diameter	g-ratio		Cmtm5fl/fl(n=5)	Cmtm5 cKO (n=5)		Cmtm5fl/fl(n=5)	Cmtm5 cKO (n=5)		Cmtm5fl/fl(n=5)	Cmtm5 cKO (n=5)		Diameter	g-Ratio	Diameter	G-Ratio		Cmtm5fl/fl (n=5)	Cmtm5 cKO (n=6)
3.45	11.6		0.75	0.3		0.830912	0.83761		1.37219	0.829975	1.3509	0.832913		1.4039	-0.63829		0.69287	0.46215		0.814823	0.821032		1.03297	0.716554	0.821537	0.736394		555.5	683.467
3.99	13.35		0.68	-0.44		0.832166	0.843659		1.37211	0.829981	1.3509	0.832939		1.28014	-1.71568		0.25898	-0.15234		0.811682	0.820259		1.03323	0.716534	0.821553	0.73641		467.4	658.695
4.53	15.1		0.61	-1.18		0.83342	0.849708		1.37202	0.829987	1.3509	0.832965		1.15638	-2.79307		-0.17491	-0.76683		0.808542	0.819485		1.03349	0.716514	0.82157	0.736427		379.3	633.924
5.07	16.85		0.54	-1.92		0.834674	0.855757		1.37194	0.829992	1.35089	0.832991		1.03262	-3.87046		-0.6088	-1.38132		0.805401	0.818712		1.03375	0.716494	0.821587	0.736443		291.2	609.152
						0.835928			1.37185	0.829998	1.35089	0.833017		0.90886	-4.94785		-1.04269	-1.99581			0.817939		1.03401	0.716474	0.821603	0.736459		203.1	584.381
									1.37176	0.830004	1.35089	0.833043											1.03427	0.716453	0.82162	0.736475			559.61
									1.37168	0.830009	1.35089	0.833069											1.03453	0.716433	0.821636	0.736492
									1.37159	0.830015	1.35089	0.833095											1.03479	0.716413	0.821653	0.736508
									1.37151	0.830021	1.35089	0.833121											1.03505	0.716393	0.821669	0.736524
									1.37142	0.830026	1.35088	0.833147											1.03531	0.716373	0.821686	0.736541
									1.37134	0.830032	1.35088	0.833173											1.03557	0.716353	0.821702	0.736557
									1.37125	0.830038	1.35088	0.833199											1.03584	0.716333	0.821719	0.736573
									1.37117	0.830043	1.35088	0.833225											1.0361	0.716312	0.821735	0.736589
									1.37108	0.830049	1.35088	0.833251											1.03636	0.716292	0.821752	0.736606
									1.371	0.830055	1.35087	0.833277											1.03662	0.716272	0.821769	0.736622
									1.37091	0.83006	1.35087	0.833303											1.03688	0.716252	0.821785	0.736638
									1.37082	0.830066	1.35087	0.833329											1.03714	0.716232	0.821802	0.736655
									1.37074	0.830072	1.35087	0.833355											1.0374	0.716212	0.821818	0.736671
									1.37065	0.830077	1.35087	0.833382											1.03766	0.716192	0.821835	0.736687
									1.37057	0.830083	1.35087	0.833408											1.03792	0.716172	0.821851	0.736704
									1.37048	0.830089	1.35086	0.833434											1.03818	0.716151	0.821868	0.73672
									1.3704	0.830094	1.35086	0.83346											1.03844	0.716131	0.821884	0.736736
									1.37031	0.8301	1.35086	0.833486											1.0387	0.716111	0.821901	0.736752
									1.37023	0.830106	1.35086	0.833512											1.03897	0.716091	0.821918	0.736769
									1.37014	0.830111	1.35086	0.833538											1.03923	0.716071	0.821934	0.736785
									1.37005	0.830117	1.35085	0.833564											1.03949	0.716051	0.821951	0.736801
									1.36997	0.830123	1.35085	0.83359											1.03975	0.716031	0.821967	0.736818
									1.36988	0.830128	1.35085	0.833616											1.04001	0.71601	0.821984	0.736834
									1.3698	0.830134	1.35085	0.833642											1.04027	0.71599	0.822	0.73685
									1.36971	0.83014	1.35085	0.833668											1.04053	0.71597	0.822017	0.736866
									1.36963	0.830145	1.35085	0.833694											1.04079	0.71595	0.822033	0.736883
									1.36954	0.830151	1.35084	0.83372											1.04105	0.71593	0.82205	0.736899
									1.36946	0.830157	1.35084	0.833746											1.04131	0.71591	0.822067	0.736915
									1.36937	0.830163	1.35084	0.833772											1.04157	0.71589	0.822083	0.736932
									1.36928	0.830168	1.35084	0.833798											1.04184	0.715869	0.8221	0.736948
									1.3692	0.830174	1.35084	0.833824											1.0421	0.715849	0.822116	0.736964
									1.36911	0.83018	1.35083	0.83385											1.04236	0.715829	0.822133	0.73698
									1.36903	0.830185	1.35083	0.833876											1.04262	0.715809	0.822149	0.736997
									1.36894	0.830191	1.35083	0.833902											1.04288	0.715789	0.822166	0.737013
									1.36886	0.830197	1.35083	0.833928											1.04314	0.715769	0.822182	0.737029
									1.36877	0.830202	1.35083	0.833954											1.0434	0.715749	0.822199	0.737046
									1.36869	0.830208	1.35082	0.83398											1.04366	0.715728	0.822216	0.737062
									1.3686	0.830214	1.35082	0.834006											1.04392	0.715708	0.822232	0.737078
									1.36852	0.830219	1.35082	0.834032											1.04418	0.715688	0.822249	0.737095
									1.36843	0.830225	1.35082	0.834058											1.04444	0.715668	0.822265	0.737111
									1.36834	0.830231	1.35082	0.834084											1.04471	0.715648	0.822282	0.737127
									1.36826	0.830236	1.35082	0.83411											1.04497	0.715628	0.822298	0.737143
									1.36817	0.830242	1.35081	0.834136											1.04523	0.715608	0.822315	0.73716
									1.36809	0.830248	1.35081	0.834162											1.04549	0.715587	0.822331	0.737176
									1.368	0.830253	1.35081	0.834189											1.04575	0.715567	0.822348	0.737192
									1.36792	0.830259	1.35081	0.834215											1.04601	0.715547	0.822365	0.737209
									1.36783	0.830265	1.35081	0.834241											1.04627	0.715527	0.822381	0.737225
									1.36775	0.83027	1.3508	0.834267											1.04653	0.715507	0.822398	0.737241
									1.36766	0.830276	1.3508	0.834293											1.04679	0.715487	0.822414	0.737257
									1.36757	0.830282	1.3508	0.834319											1.04705	0.715467	0.822431	0.737274
									1.36749	0.830287	1.3508	0.834345											1.04731	0.715446	0.822447	0.73729
									1.3674	0.830293	1.3508	0.834371											1.04758	0.715426	0.822464	0.737306
									1.36732	0.830299	1.3508	0.834397											1.04784	0.715406	0.82248	0.737323
									1.36723	0.830304	1.35079	0.834423											1.0481	0.715386	0.822497	0.737339
									1.36715	0.83031	1.35079	0.834449											1.04836	0.715366	0.822514	0.737355
									1.36706	0.830316	1.35079	0.834475											1.04862	0.715346	0.82253	0.737371
									1.36698	0.830321	1.35079	0.834501											1.04888	0.715326	0.822547	0.737388
									1.36689	0.830327	1.35079	0.834527											1.04914	0.715305	0.822563	0.737404
									1.3668	0.830333	1.35078	0.834553											1.0494	0.715285	0.82258	0.73742
									1.36672	0.830338	1.35078	0.834579											1.04966	0.715265	0.822596	0.737437
									1.36663	0.830344	1.35078	0.834605											1.04992	0.715245	0.822613	0.737453
									1.36655	0.83035	1.35078	0.834631											1.05018	0.715225	0.822629	0.737469
									1.36646	0.830355	1.35078	0.834657											1.05044	0.715205	0.822646	0.737486
									1.36638	0.830361	1.35078	0.834683											1.05071	0.715185	0.822663	0.737502
									1.36629	0.830367	1.35077	0.834709											1.05097	0.715164	0.822679	0.737518
									1.36621	0.830372	1.35077	0.834735											1.05123	0.715144	0.822696	0.737534
									1.36612	0.830378	1.35077	0.834761											1.05149	0.715124	0.822712	0.737551
									1.36604	0.830384	1.35077	0.834787											1.05175	0.715104	0.822729	0.737567
									1.36595	0.830389	1.35077	0.834813											1.05201	0.715084	0.822745	0.737583
									1.36586	0.830395	1.35076	0.834839											1.05227	0.715064	0.822762	0.7376
									1.36578	0.830401	1.35076	0.834865											1.05253	0.715044	0.822778	0.737616
									1.36569	0.830406	1.35076	0.834891											1.05279	0.715024	0.822795	0.737632
									1.36561	0.830412	1.35076	0.834917											1.05305	0.715003	0.822811	0.737648
									1.36552	0.830418	1.35076	0.834943											1.05331	0.714983	0.822828	0.737665
									1.36544	0.830423	1.35076	0.834969											1.05358	0.714963	0.822845	0.737681
									1.36535	0.830429	1.35075	0.834995											1.05384	0.714943	0.822861	0.737697
									1.36527	0.830435	1.35075	0.835022											1.0541	0.714923	0.822878	0.737714
									1.36518	0.83044	1.35075	0.835048											1.05436	0.714903	0.822894	0.73773
									1.36509	0.830446	1.35075	0.835074											1.05462	0.714883	0.822911	0.737746
									1.36501	0.830452	1.35075	0.8351											1.05488	0.714862	0.822927	0.737762
									1.36492	0.830457	1.35074	0.835126											1.05514	0.714842	0.822944	0.737779
									1.36484	0.830463	1.35074	0.835152											1.0554	0.714822	0.82296	0.737795
									1.36475	0.830469	1.35074	0.835178											1.05566	0.714802	0.822977	0.737811
									1.36467	0.830474	1.35074	0.835204											1.05592	0.714782	0.822994	0.737828
									1.36458	0.83048	1.35074	0.83523											1.05618	0.714762	0.82301	0.737844
									1.3645	0.830486	1.35074	0.835256											1.05645	0.714742	0.823027	0.73786
									1.36441	0.830491	1.35073	0.835282											1.05671	0.714721	0.823043	0.737877
									1.36432	0.830497	1.35073	0.835308											1.05697	0.714701	0.82306	0.737893
									1.36424	0.830503	1.35073	0.835334											1.05723	0.714681	0.823076	0.737909
									1.36415	0.830508	1.35073	0.83536											1.05749	0.714661	0.823093	0.737925
									1.36407	0.830514	1.35073	0.835386											1.05775	0.714641	0.823109	0.737942
									1.36398	0.83052	1.35072	0.835412											1.05801	0.714621	0.823126	0.737958
									1.3639	0.830525	1.35072	0.835438											1.05827	0.714601	0.823143	0.737974
									1.36381	0.830531	1.35072	0.835464											1.05853	0.71458	0.823159	0.737991
									1.36373	0.830537	1.35072	0.83549											1.05879	0.71456	0.823176	0.738007
									1.36364	0.830542	1.35072	0.835516											1.05905	0.71454	0.823192	0.738023
									1.36356	0.830548	1.35072	0.835542											1.05932	0.71452	0.823209	0.738039
									1.36347	0.830554	1.35071	0.835568											1.05958	0.7145	0.823225	0.738056
									1.36338	0.830559	1.35071	0.835594											1.05984	0.71448	0.823242	0.738072
									1.3633	0.830565	1.35071	0.83562											1.0601	0.71446	0.823258	0.738088
									1.36321	0.830571	1.35071	0.835646											1.06036	0.714439	0.823275	0.738105
									1.36313	0.830576	1.35071	0.835672											1.06062	0.714419	0.823292	0.738121
									1.36304	0.830582	1.3507	0.835698											1.06088	0.714399	0.823308	0.738137
									1.36296	0.830588	1.3507	0.835724											1.06114	0.714379	0.823325	0.738153
									1.36287	0.830593	1.3507	0.83575											1.0614	0.714359	0.823341	0.73817
									1.36279	0.830599	1.3507	0.835776											1.06166	0.714339	0.823358	0.738186
									1.3627	0.830605	1.3507	0.835802											1.06192	0.714319	0.823374	0.738202
									1.36261	0.83061	1.3507	0.835828											1.06218	0.714298	0.823391	0.738219
									1.36253	0.830616	1.35069	0.835855											1.06245	0.714278	0.823407	0.738235
									1.36244	0.830622	1.35069	0.835881											1.06271	0.714258	0.823424	0.738251
									1.36236	0.830627	1.35069	0.835907											1.06297	0.714238	0.823441	0.738268
									1.36227	0.830633	1.35069	0.835933											1.06323	0.714218	0.823457	0.738284
									1.36219	0.830639	1.35069	0.835959											1.06349	0.714198	0.823474	0.7383
									1.3621	0.830644	1.35068	0.835985											1.06375	0.714178	0.82349	0.738316
									1.36202	0.83065	1.35068	0.836011											1.06401	0.714157	0.823507	0.738333
									1.36193	0.830656	1.35068	0.836037											1.06427	0.714137	0.823523	0.738349
									1.36185	0.830661	1.35068	0.836063											1.06453	0.714117	0.82354	0.738365
									1.36176	0.830667	1.35068	0.836089											1.06479	0.714097	0.823556	0.738382
									1.36167	0.830673	1.35068	0.836115											1.06505	0.714077	0.823573	0.738398
									1.36159	0.830678	1.35067	0.836141											1.06532	0.714057	0.82359	0.738414
									1.3615	0.830684	1.35067	0.836167											1.06558	0.714037	0.823606	0.73843
									1.36142	0.83069	1.35067	0.836193											1.06584	0.714016	0.823623	0.738447
									1.36133	0.830695	1.35067	0.836219											1.0661	0.713996	0.823639	0.738463
									1.36125	0.830701	1.35067	0.836245											1.06636	0.713976	0.823656	0.738479
									1.36116	0.830707	1.35066	0.836271											1.06662	0.713956	0.823672	0.738496
									1.36108	0.830713	1.35066	0.836297											1.06688	0.713936	0.823689	0.738512
									1.36099	0.830718	1.35066	0.836323											1.06714	0.713916	0.823705	0.738528
									1.3609	0.830724	1.35066	0.836349											1.0674	0.713896	0.823722	0.738544
									1.36082	0.83073	1.35066	0.836375											1.06766	0.713876	0.823739	0.738561
									1.36073	0.830735	1.35066	0.836401											1.06792	0.713855	0.823755	0.738577
									1.36065	0.830741	1.35065	0.836427											1.06819	0.713835	0.823772	0.738593
									1.36056	0.830747	1.35065	0.836453											1.06845	0.713815	0.823788	0.73861
									1.36048	0.830752	1.35065	0.836479											1.06871	0.713795	0.823805	0.738626
									1.36039	0.830758	1.35065	0.836505											1.06897	0.713775	0.823821	0.738642
									1.36031	0.830764	1.35065	0.836531											1.06923	0.713755	0.823838	0.738658
									1.36022	0.830769	1.35064	0.836557											1.06949	0.713735	0.823854	0.738675
									1.36013	0.830775	1.35064	0.836583											1.06975	0.713714	0.823871	0.738691
									1.36005	0.830781	1.35064	0.836609											1.07001	0.713694	0.823888	0.738707
									1.35996	0.830786	1.35064	0.836635											1.07027	0.713674	0.823904	0.738724
									1.35988	0.830792	1.35064	0.836662											1.07053	0.713654	0.823921	0.73874
									1.35979	0.830798	1.35064	0.836688											1.07079	0.713634	0.823937	0.738756
									1.35971	0.830803	1.35063	0.836714											1.07106	0.713614	0.823954	0.738773
									1.35962	0.830809	1.35063	0.83674											1.07132	0.713594	0.82397	0.738789
									1.35954	0.830815	1.35063	0.836766											1.07158	0.713573	0.823987	0.738805
									1.35945	0.83082	1.35063	0.836792											1.07184	0.713553	0.824003	0.738821
									1.35937	0.830826	1.35063	0.836818											1.0721	0.713533	0.82402	0.738838
									1.35928	0.830832	1.35062	0.836844											1.07236	0.713513	0.824036	0.738854
									1.35919	0.830837	1.35062	0.83687											1.07262	0.713493	0.824053	0.73887
									1.35911	0.830843	1.35062	0.836896											1.07288	0.713473	0.82407	0.738887
									1.35902	0.830849	1.35062	0.836922											1.07314	0.713453	0.824086	0.738903
									1.35894	0.830854	1.35062	0.836948											1.0734	0.713432	0.824103	0.738919
									1.35885	0.83086	1.35061	0.836974											1.07366	0.713412	0.824119	0.738935
									1.35877	0.830866	1.35061	0.837											1.07392	0.713392	0.824136	0.738952
									1.35868	0.830871	1.35061	0.837026											1.07419	0.713372	0.824152	0.738968
									1.3586	0.830877	1.35061	0.837052											1.07445	0.713352	0.824169	0.738984
									1.35851	0.830883	1.35061	0.837078											1.07471	0.713332	0.824185	0.739001
									1.35842	0.830888	1.35061	0.837104											1.07497	0.713312	0.824202	0.739017
									1.35834	0.830894	1.3506	0.83713											1.07523	0.713291	0.824219	0.739033
									1.35825	0.8309	1.3506	0.837156											1.07549	0.713271	0.824235	0.739049
									1.35817	0.830905	1.3506	0.837182											1.07575	0.713251	0.824252	0.739066
									1.35808	0.830911	1.3506	0.837208											1.07601	0.713231	0.824268	0.739082
									1.358	0.830917	1.3506	0.837234											1.07627	0.713211	0.824285	0.739098
									1.35791	0.830922	1.35059	0.83726											1.07653	0.713191	0.824301	0.739115
									1.35783	0.830928	1.35059	0.837286											1.07679	0.713171	0.824318	0.739131
									1.35774	0.830934	1.35059	0.837312											1.07706	0.71315	0.824334	0.739147
									1.35765	0.830939	1.35059	0.837338											1.07732	0.71313	0.824351	0.739164
									1.35757	0.830945	1.35059	0.837364											1.07758	0.71311	0.824368	0.73918
									1.35748	0.830951	1.35059	0.83739											1.07784	0.71309	0.824384	0.739196
									1.3574	0.830956	1.35058	0.837416											1.0781	0.71307	0.824401	0.739212
									1.35731	0.830962	1.35058	0.837442											1.07836	0.71305	0.824417	0.739229
									1.35723	0.830968	1.35058	0.837468											1.07862	0.71303	0.824434	0.739245
									1.35714	0.830973	1.35058	0.837495											1.07888	0.713009	0.82445	0.739261
									1.35706	0.830979	1.35058	0.837521											1.07914	0.712989	0.824467	0.739278
									1.35697	0.830985	1.35057	0.837547											1.0794	0.712969	0.824483	0.739294
									1.35689	0.83099	1.35057	0.837573											1.07966	0.712949	0.8245	0.73931
									1.3568	0.830996	1.35057	0.837599											1.07993	0.712929	0.824517	0.739326
									1.35671	0.831002	1.35057	0.837625											1.08019	0.712909	0.824533	0.739343
									1.35663	0.831007	1.35057	0.837651											1.08045	0.712889	0.82455	0.739359
									1.35654	0.831013	1.35057	0.837677											1.08071	0.712869	0.824566	0.739375
