# Supplementary material for: Progressive axonopathy when oligodendrocytes lack the myelin protein CMTM5
Source: eLife. 2022 Mar 11;11:e75523. doi: 10.7554/eLife.75523 (PMC8916772; doi:10.7554/eLife.75523)
Supplement: Figure 3—figure supplement 1—source data 1. [file elife-75523-fig3-figsupp1-data1.xlsx]

## Sheet: Sheet1
Fig 3 S1 A			Fig 3 S1 A´			Fig 3 S1 B			Fig 3 S1 B´			Fig 3 S1 C			Fig 3 S1 C´
Average diameter P75			Frequency Distribution P75			Average Diameter 1 year			Frequency distribution 1 year			Average diameter P75			Frequency Distribution P75
CTRL	Cmtm5 cKO		CTRL	Cmtm5 cKO		CTRL	Cmtm5 cKO		CTRL	Cmtm5 cKO		CTRL	Cmtm5 null		CTRL	Cmtm5 null
1.07829	1.10425		0.892	1.196		1.48892	1.26423		2.108	1.099		1.22174	1.08986		1.311	0.807
1.14766	1.22147		0.71	1.404		1.44967	1.33906		0.629	2.324		1.04307	1.08977		1.996	1.003
1.26116	1.20759		1.543	0.648		1.32459	1.57549		0.898	0.916		1.05531	1.16138		0.976	1.915
1.12923	1.26874		0.834	0.939		1.28812	1.65587		1.015	1.371		1.11096	1.09841		0.913	1.218
1.17413	1.06765		1.257	0.83		1.43605			1.033	1.646		1.2672	1.20905		0.895	1.363
			1.81	1.045					2.501	1.725					2.11	0.741
			0.655	1.282					1.258	1.834					1.068	1.36
			1.165	1.212					0.878	1.535					1.352	1.106
			0.753	1.259					2.072	1.051					1.894	1.09
			1.285	0.916					0.685	3.197					1.665	1.248
			0.685	0.748					2.035	1.605					3.156	1.467
			0.586	0.733					2.796	1.484					1.29	1.344
			0.874	1.02					0.816	1.947					1.189	0.754
			1.026	1.444					1.265	0.99					1.33	1.605
			0.932	0.903					0.917	0.81					0.883	1.383
			1.537	0.934					5.98	0.882					1.348	0.868
			0.809	1.616					1.664	1.327					1.038	1.139
			0.586	0.94					1.179	1.161					0.713	1.016
			0.647	0.832					0.834	2.988					0.896	0.84
			2.243	1.131					2.205	0.96					1.132	2.312
			2.336	1.085					1.914	0.844					1.096	0.661
			2.035	0.585					1.794	2.195					1.473	0.816
			1.534	0.915					1.626	1.883					0.748	0.741
			1.033	1.16					2.87	1.903					0.865	1.347
			1.567	0.857					1.851	1.444					1.575	0.743
			1.033	1.311					1.188	1.021					0.895	0.911
			0.831	0.636					1.82	1.025					0.988	1.259
			1.281	0.748					1.405	1.592					0.759	1.377
			0.804	0.635					1.073	1.925					1.021	1.617
			2.225	1.071					2.593	1.631					0.75	1.297
			1.531	1.355					0.885	1.987					1.199	0.778
			0.818	1.203					1.105	1.17					1.225	1.399
			0.717	1.845					1.142	1.181					0.981	0.708
			2.315	0.586					0.936	2.922					0.679	1.184
			0.714	0.472					2.411	0.919					1.539	1.096
			1.144	1.438					2.832	1.074					0.736	1.148
			1.314	2.117					0.879	1.075					0.593	0.956
			1.579	0.497					0.683	1.182					0.991	0.566
			1.162	0.525					1.355	0.892					1.348	1.149
			0.976	0.344					2.568	1.478					1.002	1.411
			0.631	1.631					1.982	1.089					0.902	1.158
			1.18	2.298					0.967	1.19					0.931	0.876
			0.857	1.82					1.58	0.768					1.128	0.911
			1.105	1.935					3.305	1.193					0.63	1.408
			1.285	0.675					0.985	1.313					0.918	1.112
			0.977	0.637					2.451	1.085					1.801	1.425
			1.419	1.585					2.451	0.756					0.931	1.592
			0.532	1.508					1.792	1.004					1.677	1.128
			0.697	0.926					1.836	0.557					0.898	1.186
			2.32	0.89					1.559	1.123					1	1.403
			0.797	0.629					0.951	1.893					0.886	1.305
			1.557	0.726					0.526	2.933					1.088	2.727
			0.734	0.597					0.926	1.377					0.642	1.567
			1.035	1.17					1.097	1.694					1.052	1.024
			1.329	0.688					1.796	1.362					1.273	1.032
			0.85	1.012					0.691	1.734					0.933	1.349
			1.396	0.814					1.073	0.611					1.757	1.228
			0.7	0.809					1.211	1.054					0.977	1.222
			2.117	1.062					1.356	0.772					0.794	0.65
			1.289	0.779					1.187	0.697					1.634	1.182
			0.829	0.918					1.059	1.27					0.801	1.899
			0.743	0.61					0.965	1.039					0.985	1.059
			1.419	1.019					0.971	1.261					0.873	1.369
			2.256	0.715					0.973	1.063					1.137	1.128
			1.419	0.814					1.133	0.601					1.375	0.759
			0.626	1.091					1.503	0.747					1.875	0.671
			0.811	2.095					1.239	1.004					0.723	1.03
			1.136	1.006					1.111	0.557					0.997	1.627
			1.48	1.34					1.397	1.124					0.682	0.963
			1.781	1.023					0.87	1.898					0.748	0.976
			1.772	1.235					0.93	2.907					0.751	0.708
			1.275	1.457					1.463	1.361					1.062	0.897
			1.373	1.67					0.607	0.727					1.086	1.375
			1.198	0.658					1.9	1.714					1.002	1.462
			1.153	1.04					0.964	1.77					1.341	0.779
			1.328	1.029					1.377	0.643					1.452	0.923
			0.802	0.696					1.475	1.084					0.81	1.093
			0.952	0.998					1.427	0.771					0.807	1.661
			1.008	0.89					0.738	1.307					1.168	0.628
			0.794	1.089					1.233	1.042					0.916	1.285
			0.943	0.83					2.232	1.255					0.686	1.086
			1.424	0.773					0.699	1.301					0.959	1.167
			0.617	2.863					0.938	1.056					0.678	1.871
			0.657	1.87					2.042	2.374					1.115	1.495
			1.288	1.527					1.22	1.694					0.974	1.857
			0.707	1.252					4.188	1.292					1.358	0.834
			1.626	1.48					1.378	1.343					0.925	1.345
			1.451	1.115					1.767	1.575					0.979	1.867
			1.075	2.432					1.33	1.483					0.719	1.322
			1.458	0.635					1.694	1.66					1.437	1.174
			0.923	0.526					0.944	0.9					1.11	1.026
			0.892	1.651					1.162	0.974					0.947	0.76
			1.594	1.607					1.089	1.143					0.975	1.014
			0.859	0.546					1.015	1.128					1.098	0.707
			0.73	1.288					0.738	1.385					1.183	0.781
			0.93	0.542					0.876	0.708					1.015	0.612
			1.169	0.738					0.864	0.956					0.708	0.875
			0.631	3.315					2.742	1.07					1.123	0.875
			0.99	0.955					2.372	1.388					0.94	1.822
			1.039	0.815					1.621	0.778					1.303	0.97
			0.693	0.757					0.979	0.773					1.091	0.953
			1.055	0.868					1.484	1.126					0.973	0.759
			0.924	1.107					1.641	1.793					0.936	1.192
			0.954	1.161					0.693	1.957					0.74	1.311
			1.58	1.733					1.021	0.595					0.691	1.104
			0.924	0.739					0.636	1.407					1.082	0.912
			0.875	0.659					1.319	1.281					0.907	1.174
			0.738	2.504					1.421	1.471					1.386	0.897
			1.32	0.716					1.426	1.134					0.634	2.549
			0.99	0.991					1.447	1.357					0.868	1.007
			0.739	1.01					1.315	1.249					1.491	1.264
			1.116	0.995					0.701	1.406					1.126	0.676
			1.062	0.739					1.252	2.01					0.708	0.934
			0.979	1.03					1.657	1.401					0.744	0.578
			0.865	0.812					1.03	0.844					0.614	0.93
			0.697	1.139					3.711	0.914					0.549	0.635
			0.887	1.411					3.243	1.147					0.439	1.371
			0.716	1.767					1.102	1.519					0.593	1.195
			0.751	0.835					0.997	1.825					0.589	0.793
			0.82	0.919					1.449	0.722					0.477	1.074
			1.048	0.664					0.88	1.276					0.709	0.82
			1.228	1.11					1.761	0.905					2.378	1.04
			1.228	0.759					0.69	0.637					0.649	0.938
			0.909	1.015					2.304	1.298					1.031	1.018
			0.917	0.791					0.925	1.166					0.562	0.562
			1.07	1.132					1.272	1.22					0.63	0.987
			0.629	1.51					1.722	0.976					0.755	1.148
			1.869	0.648					0.893	1.058					1.312	1.279
			0.68	0.681					1.631	1.838					1.433	1.129
			0.55	0.626					3.331	1.319					2.179	0.924
			0.741	0.782					2.243	2.38					1.379	0.867
			1.423	0.897					2.644	0.865					0.954	1.008
			1.566	0.904					1.715	2.049					1.018	2.197
			1.368	1.27					3.078	2.551					0.763	1.03
			1.61	1.282					1.189	1.331					0.97	1.803
			1.53	0.885					1.094	1.148					0.886	1.19
			1.023	0.818					1.212	0.797					1.128	1.073
			1.298	1.038					0.71	1.365					1.745	0.696
			0.946	1.024					3.817	0.49					0.818	1.463
			0.797	2.56					1.397	0.699					1.21	1.073
			1.325	0.418					0.545	1.074					1.55	0.774
			0.726	2.02					0.874	0.897					0.851	0.651
			0.859	1.338					1.513	0.985					1.36	0.979
			1.051	2.133					1.797	2.429					1.478	0.873
			0.754	1.428					0.81	2.2					1.014	2.225
			0.827	1.283					1.385	1.501					1.83	1.428
			0.72	1.669					0.845	2.545					2.42	1.655
			0.756	2.769					0.739	1.42					1.417	0.826
			1.423	2.251					2.322	2.135					1.042	0.833
			1.044	0.537					1.586	0.746					0.949	1.013
			0.574	0.427					1.352	1.087					1.113	0.842
			0.975	0.444					0.913	0.739					0.755	1.016
			0.788	1.9					1.747	1.013					1.355	0.859
			0.795	1.026					0.949	1.526					0.667	0.981
			0.613	0.94					1.733	1.073					1.186	0.779
			0.875	0.988					1.433	0.813					1.304	1.143
			0.853	0.617					2.708	2.031					0.851	1.833
			2.959	0.595					2.079	0.625					1.316	1.158
			1.595	1.041					1.534	1.273					2.003	1.116
			2.066	0.572					0.978	2.181					0.733	1.192
			1.858	0.593					1.006	0.976					0.887	0.979
			2.195	0.874					0.959	1.629					1.249	0.829
			1.537	0.663					1.823	1.148					1.291	1.191
			0.688	1.49					1.025	1.799					0.812	1.048
			0.759	0.655					0.738	1.249					0.995	0.866
			0.677	0.722					0.952	1.428					1.714	0.847
			2.322	1.076					0.831	0.881					0.614	0.871
			0.972	0.627					2.336	0.943					1.229	1.474
			1.283	0.842					0.833	0.779					0.884	0.846
			0.806	1.085					1.082	0.816					1.157	0.984
			2.323	0.743					0.988	1.737					0.865	1.513
			0.54	0.769					1.24	0.919					0.959	0.925
			0.779	0.638					1.279	1.773					1.109	1.07
			0.813	1.02					2.516	1.126					0.661	0.749
			1.196	0.705					1.009	1.062					0.712	1.036
			0.678	0.907					0.639	1.748					0.716	1.082
			0.923	1.131					0.704	1.183					1.722	1.238
			0.67	0.648					1.686	1.767					0.596	1.229
			0.654	0.911					0.736	1.009					0.714	0.893
			0.64	1.24					1.554	1.36					1.625	0.921
			2.348	1.084					1.678	1.153					1.42	0.99
			2.389	1.113					0.993	2.187					1.71	1.095
			0.637	1.051					1.039	1.017					3.017	0.778
			0.945	1.072					0.714	0.921					1.564	0.924
			0.619	0.661					2.219	2.715					0.976	0.689
			1.627	1.662					3.106	0.691					1.907	0.662
			0.848	0.943					2.02	3.325					1.169	1.162
			0.997	0.858					2.217	1.949					1.051	1.612
			0.94	0.907					1.529	1.144					1.009	1.297
			2.159	1.905					1.479	0.698					2.215	0.886
			0.884	1.257					1.849	0.845					1.64	0.733
			0.819	1.667					0.683	1.245					1.286	1.014
			0.686	0.47					1.177	0.617					1.038	0.872
			0.824	0.445					0.74	1.684					1.235	0.567
			0.659	1.45					1.876	1.332					1.495	0.949
			1.002	2.645					1.515	1.727					0.912	1.199
			1.203	1.519					1.896	1.152					1.116	1.075
			0.74	0.846					1.616	0.773					0.67	0.883
			1.265	1.422					1.844	3.342					0.717	0.863
			1.415	0.918					0.93	1.11					1.124	1.519
			1.005	0.969					1.158	1.559					1.458	0.943
			1.138	1.107					1.353	1.26					1.678	0.586
			0.883	1.362					0.87	1.006					0.641	0.508
			1.231	1.051					1.54	1.969					1.078	0.421
			1.104	0.83					1.175	1.328					1.6	0.55
			1.138	1.425					2.149	0.862					1.84	0.719
			1.688	1.024					1.529	1.292					0.686	0.7
			0.872	1.192					1.381	1.953					1.231	0.51
			0.55	0.901					1.779	1.21					1.238	0.957
			0.974	0.932					1.092	0.602					1.076	0.717
			0.646	1.248					1.606	1.224					1.194	1.832
			1.18	0.682					1.001	3.048					0.788	0.834
			1.003	1.092					3.868	0.943					1.107	0.746
			0.95	0.6					1.257	0.875					1.133	0.678
			0.872	0.782					0.809	0.885					0.965	0.746
			1.203	0.719					0.757	0.824					2.367	1.835
			1.428	1.246					1.674	2.313					0.569	0.756
			1.887	0.747					0.867	0.934					2.971	0.939
			1.002	1.258					1.271	1.221					1.13	0.752
			1.114	0.976					1.185	1.531					1.004	1.453
			0.72	0.694					1.608	0.956					1.079	1.34
			1.053	2.122					2.451	1.062					2.171	0.949
			0.685	1.111					1.833	1.504					1.253	0.854
			1.832	0.788					1.413	1.065					1.217	0.781
			0.922	1.408					1.123	0.609					1.972	1.572
			0.774	0.931					1.266	0.644					1.975	0.876
			1.051	0.889					1.613	0.981					0.919	0.995
			1.333	0.978					1.409	1.161					1.049	0.801
			0.711	1.072					1.509	1.536					1.948	0.894
			1.527	0.964					1.948	1.21					0.816	1.539
			0.855	1.639					2.32	1.161					1.414	0.891
			0.677	2.213					2.302	0.817					0.916	0.627
			0.921	1.287					1.318	0.864					0.717	0.975
			0.939	0.765					1.775	1.828					0.829	1.26
			0.649	1.624					0.705	1.093					0.922	1.49
			0.685	1.025					1.452	2.012					0.946	1.077
			1.763	1.087					0.832	1.417					1.434	0.971
			1.112	1.278					1.213	1.067					1.009	1.115
			1.371	0.734					2.841	0.826					1.635	1.021
			1.501	0.922					1.53	0.873					0.884	1.077
			0.7	1.042					3.226	3.686					0.972	1.062
			1.056	0.953					2.42	0.556					1.599	1.194
			0.859	0.816					1.881	1.659					1.154	1.433
			1.044	1.038					1.21	3.79					1.264	0.931
			0.906	0.671					1.105	0.651					0.699	1.252
			1.219	0.611					2.061	0.83					0.859	1.2
			1.433	2.542					1.02	1.25					0.884	1.053
			0.825	1.107					2.028	3.185					1.253	0.738
			1.429	1.75					2.532	1.404					0.894	0.723
			0.766	2.72					2.12	1.26					0.917	1.238
			0.874	1.652					1.947	1.205					1.229	1.253
			1.008	1.261					1.961	1.019					1.221	1.022
			1.155	1.058					2.233	1.079					0.975	0.584
			0.685	2.446					1.876	1.558					1.708	1.044
			1.194	1.199					1.327	2.334					1.241	1.134
			0.869	2.186					1.438	1.035					1.076	0.76
			0.795	0.78					1.025	1.545					1.6	0.689
			0.823	0.905					0.973	1.273					0.707	1.101
			1.166	0.833					1.266	1.106					1.521	1.888
			0.92	1.731					2.054	1.051					0.838	1.178
			1.715	1.088					1.422	1.457					1.969	0.959
			0.781	1.681					2.508	1.059					1.563	0.921
			1.03	0.817					1.004	1.143					0.985	0.679
			0.638	0.832					1.382	0.788					1.178	0.919
			1.084	1.094					1.336	1.677					2.453	1.33
			0.861	1.358					0.83	2.242					0.45	1.548
			1.257	0.823					1.545	1.574					0.691	1.451
			2.19	0.967					2.66	1.138					1.418	1.189
			0.943	0.86					1.985	0.989					1.942	1.103
			1.349	0.833					2.654	1.192					1.967	1.09
			1.103	0.7					1.066	0.678					0.726	0.987
			0.706	0.743					1.503	0.673					0.833	0.954
			0.986	1.084					2.437	0.653					1.339	1.168
			0.886	0.708					1.06	0.58					1.402	1.067
			0.897	1.362					2.171	0.918					1.225	0.897
			0.725	0.95					0.678	1.072					0.784	1.22
			1.237	0.793					1.806	1.194					0.62	0.959
			0.751	0.748					2.231	1.062					0.919	0.698
			0.953	1.88					1.344	1.895					0.896	1.606
			0.662	1.622					0.908	1.074					1.11	1.194
			1.877	1.38					1.021	0.797					0.984	0.923
			1.423	0.593					2.044	0.959					0.571	0.99
			1.023	1.363					1.229	1.741					0.778	1.041
			0.641	1.834					2.848	1.012					1.023	0.996
			0.955	0.557					2.163	0.944					0.653	0.754
			1.612	1.657					1.766	1.54					1.668	0.824
			0.897	0.614					1.008	1.172					1.61	1.288
			1.694	0.964					1.371	2.609					0.885	0.866
			0.87	0.7					0.906	0.741					0.715	0.617
			0.745	0.667					1.562	1.6					0.754	0.702
			1.01	1.439					1.15	1.468					1.735	0.598
			0.668	1.419					1.352	1.859					1.003	0.733
			0.871	1.141					1.338	0.964					1.405	0.514
			0.581	1.681					2.084	0.658					0.875	0.611
			0.821	0.917					2.21	1.425					1.308	0.697
			0.746	0.699					1.207	1.787					1.338	0.633
			0.687	1.201					1.886	1.031					1.362	0.778
			0.956	0.898					2.372	0.899					1.315	0.672
			0.733	1.445					1.176	1.138					1.277	0.874
			0.713	1.32					2.131	1.667					2.071	0.907
			0.784	0.958					1.464	1.332					0.812	0.674
			2.246	0.767					1.189	1.191					0.603	0.882
			0.719	0.971					2.052	1.449					1.658	1.284
			0.753	0.732					1.549	1.381					0.61	1.355
			1.04	0.76					1.404	1.546					2.331	1.029
			0.726	1.1					0.93	1.201					1.307	1.18
			1.129	0.629					0.943	1.513					0.94	1.098
			0.712	1.21					1.401	0.903					2.357	1.35
			1.262	1.22					0.969	0.879					1.151	0.992
			1.389	1.209					1.477	1.366					0.658	1
			1.25	1.709					1.127	1.976					2.151	0.861
			1.71	0.701					0.847	1.235					0.908	1.012
			0.861	0.665					1.297	1.167					1.206	0.786
			1.043	1.18					1.31	1.312					0.688	1.112
			0.874	1.125					1.398	1.081					0.959	1.335
			0.859	1.436					0.906	1.449					0.631	1.018
			0.786	1.434					1.465	1.549					0.935	1.506
			1.25	0.765					1.538	0.933					0.824	1.177
			0.833	1.187					1.241	1.036					0.724	1.286
			0.758	0.964					0.98	1.841					0.951	1.366
			0.711	1.023					0.96	1.872					0.699	1.41
			1.367	0.586					1.86	2.019					0.722	2.036
			0.876	0.869					1.427	2.095					1.256	1.164
			1.001	0.804					0.819	0.957					1.234	1.09
			0.584	0.789					1.073	1.196					0.841	0.945
			0.543	0.821					1.95	1.399					0.853	1.299
			0.833	0.665					0.854	1.296					0.511	1.171
			0.667	0.645					0.696	1.012					0.672	1.067
			1.182	0.646					1.334	1.121					3.09	1.249
			0.987	0.823					1.497	1.522					3.329	1.371
			1.58	1.004					1.159	0.816					1.22	0.593
			0.756	0.982					1.572	1.857					1.073	0.872
			1.356	0.993					1.023	1.165					0.917	1.549
			1.366	0.959					1.83	1.112					0.896	1.98
			1.119	0.729					1.706	1.303					1.138	1.783
			1.198	2.434					1.25	0.821					3.365	1.035
			0.915	1.497					1.909	3.107					1.129	1.051
			1.311	0.995					2.039	0.821					1.491	1.011
			1.511	1.057					1.013	0.87					1.585	1.106
			0.875	1.57					1.473	1.542					1.184	1.052
			1.052	0.805					2.137	1.176					2.173	0.863
			0.778	1.693					1.677	1.015					1.007	1.02
			0.992	2.163					1.204	1.203					0.824	1.369
			0.943	0.613					1.531	1.121					1.211	0.791
			0.836	2.246					1.713	0.873					0.933	1.442
			0.932	1.019					1.643	0.814					1.675	1.146
			1.138	0.651					1.209	2.076					1.778	0.809
			0.968	1.683					1.132	1.209					1.725	0.87
			0.63	2.016					1.187	1.214					1.522	0.932
			0.727	0.626					1.868	1.428					1.64	0.875
			0.749	0.825					1.88	1.791					1.203	2.095
			0.686	0.707					2.714	0.987					1.307	1.124
			0.906	0.67					1.197	1.333					1.329	1.052
			0.764	1.84					1.849	3.47					1.394	0.728
			1.116	0.914					1.266	1.077					0.79	1.419
			0.725	0.879					1.631	1.083					0.836	0.907
			1.423	1.057					1.725	2.39					1.146	0.943
			1.019	0.832					1.085	1.569					1.046	0.734
			0.729	0.815					1.274	1.558					1.461	1.127
			1.025	0.815					1.353	0.803					2.404	1.893
			1.204	1.018					1.069	1.008					1.028	0.845
			0.74	0.787					0.701	1.176					1.289	1.426
			1.299	1.492					1.264	0.892					1.347	1.086
			0.77	0.665					0.828	0.872					1.014	1.478
			1.195	0.879					1.044	1.07					0.836	0.671
			0.71	0.708					1.857	1.248					1.222	1.093
			0.866	0.619					1.723	2.161					0.617	1.153
			0.732	0.724					2.141	1.069					1.327	1.592
			1.132	0.892					0.723	2.002					0.972	1.485
			1.015	0.825					1.213	1.137					1.348	0.92
			0.61	0.8					1.78	1.185					1.713	1.274
			0.809	0.759					0.988	1.03					1.128	0.933
			0.944	1.079					0.879	1.091					2.699	1.091
			1.568	1.363					1.197	1.188					1.162	1.739
			0.825	0.777					1.476	0.827					0.759	1.219
			0.715	0.709					2.098	1.132					0.859	0.725
			0.843	0.933					3.014	0.676					1.25	1.222
			1.018	0.903					2.157	1.391					0.827	0.866
			0.895	0.755					0.989	0.887					1.37	1.159
			0.728	1.475					6,989*	0.938					1.845	1.263
			0.95	1.027					2.064	1.19					1.297	0.692
			0.835	2.475					2.062	1.873					2.28	0.738
			1.025	2.553					1.644	1.167					0.572	1.153
			0.976	1.95					1.709	1.222					1.914	0.691
			0.821	0.513					1.083	1.038					1.584	1.007
			0.744	2.544					1.028	1.094					1.032	1.797
			0.981	0.518					1.956	0.91					0.708	1.204
			0.988	1.179					1.135	1.248					0.904	0.956
			1.457	1.446					2.167	1.27					1.079	1.176
			0.807	1.656					2.516	0.722					1.119	1.636
			0.988	1.045					0.931	1.565					1.003	0.611
			0.732	0.544					0.95	1.009					1.12	1.233
			1.276	0.545					1.176	0.819					0.695	1.849
			0.789	0.478					1.246	1.075					0.947	0.62
			1.027	0.704					0.91	1.433					1.249	0.614
			1.074	0.879					1.115	1.876					0.559	0.441
			0.875	0.961					1.16	1.002					2.684	0.817
			0.811	0.733					1.407	1.394					0.711	0.604
			0.75	1.037					2.073	0.743					0.769	1.677
			1.145	0.772					1.692	2.457					3.228	0.726
			1.209	0.842					1.359	1.725					0.619	0.631
			0.801	0.858					1.579	1.132					0.591	0.578
			1.128	0.918					0.942	0.825					0.802	1.906
			1.034	0.673					1.026	1.287					0.655	1.928
			0.697	0.931					1.718	1.373					0.499	0.575
			0.884	1.241					1.73	2.096					1.933	0.715
			1.08	0.892					1.547	1.292					1.084	0.784
			0.873	0.759					1.408	1.088					0.828	0.696
			0.638	0.92					2.139	1.035					0.71	0.759
			0.688	1.21					1.12	0.883					0.76	0.742
			1.27	0.769					0.732	0.997					1.377	1.009
			0.829	0.554					2.275	0.684					2.064	0.641
			0.932	1.246					1.36	0.743					2.076	0.632
			1.087	1.237					1.581	0.989					3.034	1.154
			1.113	0.95					1.945	0.986					1.214	0.784
			0.86	0.923					0.779	1.062					0.94	0.986
			1.082	1.062					1.698	1.264					0.718	1.463
			0.772	0.84					0.827	1.063					0.886	0.9
			1.128	0.677					0.806	1.134					0.87	1.127
			0.823	0.642					0.772	1.341					1.273	0.748
			0.658	1.281					1.776	0.529					0.961	0.945
			1.314	0.663					1.654	0.863					0.967	1.07
			1.246	0.67					1.602	2.636					2.22	1.385
			1.322	1.991					2.146	2.647					1.063	0.694
			1.031	0.636					0.929	0.725					0.72	1.074
			0.715	1.897					1.572	0.937					1.609	0.851
			0.898	0.531					0.792	2.809					1.131	0.832
			0.777	1.412					1.328	0.778					4.009	1.416
			0.863	0.93					2.045	0.928					1.183	1.087
			1.575	1.98					1.913	1.737					1.025	0.763
			1.071	1.417					0.746	0.974					0.792	0.732
			0.776	1.309					1.583	1.674					1.118	1.059
			0.906	1.42					1.767	0.993					1.264	1.176
			1.065	1.181					3.675	1.58					0.792	0.88
			0.918	2.101					0.965	1.631					1.123	1.507
			0.661	1.163					0.907	1.057					1.439	0.618
			0.77	0.463					3.456	2.172					1.392	1.009
			0.927	1.763					0.921	1.697					0.828	1.216
			1.009	0.759					2.649	1.183					1.982	1.059
			0.706	0.834					0.578	1.32					1.631	0.716
			0.844	0.883					3.218	0.769					0.901	0.709
			0.861	1.219					1.174	0.805					0.861	0.849
			1.143	0.85					1.244	1.992					1.308	1.052
			1.135	0.869					0.72	1.663					0.948	1.361
			0.969	1.49					2.146	1.498					1.21	0.641
			0.678	0.823					1.477	1.703					0.949	1.011
			0.672	0.753					0.904	1.909					1.24	1.671
			0.949	0.655					1.932	0.699					1.226	1.49
			0.893	1.319					1.254	2.221					0.982	0.872
			0.833	0.879					2.305	1.519					1.257	1.461
			1.264	0.667					1.915	1.017					1.212	0.725
			1.318	1.424					1.995	3.544					1.213	1.258
			2.101	1.041					1.677	1.338					0.799	0.943
			1.085	0.999					1.151	0.931					0.795	0.95
			0.937	0.58					0.911	1.043					1.067	0.845
			0.754	0.618					2.016	1.42					1.373	1.145
			0.965	0.853					0.796	0.768					0.723	1.411
			1.052	1.023					1.808	1.588					2.251	2.062
			1.152	0.942					1.307	1.421					1.346	1.157
			0.717	0.997					1.527	1.665					0.835	0.952
			0.695	0.594					1.824	1.471					1.063	0.504
			0.879	1.173					1.732	0.897					1.495	1.222
			0.606	1.551					2.046	1.108					1.062	0.79
			0.826	1.138					0.616	1.415					1.628	0.999
			0.913	0.988					2.822	1.095					1.141	1.256
			0.885	0.972					1.271	0.972					2.209	1.628
			1.047	1.494					1.131	1.425					0.934	1.744
			0.956	0.726					1.317	0.716					0.997	1.491
			0.629	1.274					1.829	0.796					1.053	0.985
			1.13	0.662					1.804	1.706					1.721	1.21
			1.113	1.25					1.533	1.036					1.143	1.033
			1.24	0.652					0.97	1.428					1.027	1.039
			1.085	0.816					1.188	1.015					1.303	0.908
			0.837	0.641					1.55	1.284					2.352	1.271
			0.907	5.171					0.74	2.788					0.641	1.365
			0.965	1.176					0.726	1.601					2.311	1.054
			0.859	3.003					0.821	1.791					3.633	1.835
			1.399	0.535					0.843	1.19					2.053	0.844
			0.729	0.466					0.853	1.598					2.044	0.991
			1.602	0.957					0.952	1.735					1.192	0.851
			0.964	0.786					1.132	1.53					0.619	1.084
			1.112	1.448					0.915	0.811					0.612	1.859
			1.131	1.337					0.94	1.215					0.951	1.107
			0.709	0.499					0.901	1.093					0.597	1.635
			0.717	2.253					0.885	2.496					0.845	1.452
			0.78	1.822					0.804	1.862					0.933	0.814
			0.759	0.649					0.792	1.899					1.449	0.469
			0.941	1.213					0.737	1.326					0.74	0.79
			0.847	0.49					0.874	0.949					0.593	0.51
			0.823	1.322					0.665	0.688					0.949	0.647
			0.792	1.302					1.515	2.601					1.147	0.703
			1.113	1.134					0.735	1.417					1.458	2.734
			0.74	1.477					3.527	0.791					0.663	1.587
			0.659	0.62					1.797	0.843					1.177	0.847
			0.93	0.645					0.785	1.523					0.692	0.779
			0.782	0.567					1.773	0.791					2.147	0.646
			1.32	1.496					0.726	1.257					0.959	1.185
			0.807	1.652					0.982	1.136					0.92	1.742
			1.713	0.682					0.702	1.56					1.108	1.036
			0.976	1.644					1.141	1.574					0.818	1.688
			0.816	0.762					0.651	1.161					0.934	1.588
			0.914	0.901					0.952	1.208					1.609	1.035
			1.429	1.015					2.414	1.011					1.255	1.835
			0.626	0.62					1.392	1.051					1.299	1.048
			0.669	1.32					1.483	2.242					1.251	0.877
			0.746	0.801					0.709	0.976					1.254	0.783
			0.951	0.823					1.385	1.261					3.007	1.371
			1.234	1.589					0.734	1.328					1.469	1.066
			1.825	0.823					1.482	1.783					1.563	1.845
			0.82	0.729					0.764	2.009					0.912	1.195
			0.814	0.753					1.171	1.138					1.057	0.665
			0.727	0.586					1.991	0.909					0.709	1.074
			0.892	1.261					1.831	0.861					1.352	1.299
			0.7	0.757					1.63	1.187					1.345	1.493
			0.708	0.614					0.597	1.001					1.149	1.85
			1.148	1.12					0.684	1.854					1.442	0.664
			1.388	1.675					1.129	0.619					2.026	1.87
			0.705	0.866					1.034	1.68					0.995	0.929
			0.924	2.143					0.904	2.182					1.152	1.732
			0.869	0.94					1.127	0.934					0.964	0.941
			0.71	0.943					1.537	0.727					0.986	1.608
			3.278	0.724					4.04	0.714					1.125	0.64
			2.281	0.827					0.943	0.816					2.181	1.602
			2.317	1.109					1.572	1.761					1.025	1.073
			3.019	0.757					0.925	1.168					0.809	1.04
			1.124	0.554					0.967	0.902					1.323	1.234
			0.571	0.684					1	2.152					0.645	0.758
			0.706	0.881					4.066	1.12					0.6	1.038
			0.58	0.798					1.451	1.101					0.773	0.794
			0.725	1.357					0.809	1.101					0.943	0.965
			0.512	0.558					2.109	0.588					0.733	1.501
			1.403	2.038					1.646	0.845					1.51	0.794
			1.886	1.746					1.644	1.099					0.783	0.867
			1.533	2.283					1.32	0.962					1.911	0.582
			2.987	1.878					1.191	1.855					1.408	0.907
			1.011	1.557					0.855	2.045					0.839	0.842
			1.492	0.672					2.434	1.541					0.812	1.069
			1.393	0.889					0.935	2.257					1.458	0.729
			0.719	1.41					2.246	2.847					1.117	1.609
			0.953	0.935					1.057	3.842					0.962	1.571
			1.07	2.28					0.866	1.161					0.668	0.836
			0.878	1.141					1.089	1.156					0.559	1.115
			0.947	0.595					0.698	0.746					3.687	0.823
			0.813	1.964					1.049	1.401					0.836	0.768
			0.783	0.916					1.452	0.892					1.72	1.081
			1.389	1.795					1.442	0.871					0.443	0.668
			0.798	2.23					1.211	0.639					1.396	0.886
			1.018	1.428					0.991	0.795					2.494	1.579
			0.992	1.142					1.012	1.092					2.329	1.122
			1.119	0.806					1.683	0.744					3.129	0.936
			0.622	0.752					2.609	0.671					1.598	1.383
			1.36	1.046					1.414	2.022					1.141	0.789
			0.989	1.173					1.687	1.385					1.317	2.778
			1.173	0.619					1.925	0.925					0.846	0.793
			0.972	0.937					1.675	0.894					0.97	0.755
			1.266	0.709					2.152	0.932					1.423	0.992
			1.014	1.096					0.759	1.406					1.09	1.062
			0.704	1.167					1.065	1.308					1.134	2.858
			0.784	0.927					1.138	0.706					1.54	1.422
			1.037	0.747					1.048	0.759					0.929	0.983
			1.041	0.912					1.163	0.743					0.759	1.384
			0.968	0.806					1.102	0.749					1.068	1.264
			0.968	0.679					0.568	2.114					1.184	1.107
			0.921	0.707					0.559	0.81					2.077	0.833
			0.743	0.737					0.82	1.213					1.097	0.651
			0.993	0.723					1.165	0.948					2.851	2.127
			0.841	1.599					1.894	0.79					0.987	0.79
			0.705	0.814					1.244	1.166					1.334	0.986
			1.105	1.096					1.665	0.996					0.74	1.344
			1.136	0.775					0.875	0.804					3.225	1.018
			1.156	2.97					0.991	0.875					1.294	1.339
			1.033	1.123					0.967	0.747					0.742	0.877
			2.301	1.848					1.385	1.41					0.8	1.389
			1.352	0.462					0.98	0.763					0.985	2.256
			0.64	1.067					1.109	1.872					1.157	1.616
			0.717	0.599					1.307	0.762					2.888	1.094
			1.266	1.117					2.197	1.972					2.034	1.146
			1.021	1.637					0.729	1.212					1.062	1.53
			0.847	0.813					1.676	0.972					2.196	0.83
			1.281	0.95					2.534	1.806					0.813	0.931
			0.755	0.661					0.711	1.463					1.326	0.969
			1.385	0.802					1.262	2.42					1.423	2.066
			1.22	0.707					1.956	2.345					1.548	0.898
			0.998	0.658					2.246	1.33					1.24	1.316
			0.885	1.134					1.855	1.128					0.948	0.699
			1.046	0.954					0.876	1.142					0.934	1.243
			0.977	0.806					1.36	1.381					0.76	0.73
			2.327	0.97					0.879	1.102					0.914	0.921
			1.172	0.673					1.69	2.237					1.702	0.856
			0.971	0.817					0.735	1.352					1.997	1.133
			1.066	0.766					1.304	1.078					0.919	1.226
			0.984	1.026					0.944	1.149					0.929	1.166
			0.921	0.617					1.573	1.211					0.951	0.718
			0.902	1.171					0.953	1.072					1.144	1.076
			0.943	2.511					1.323	0.9					0.88	0.868
			0.685	2.23					1.18	0.935					1.219	0.697
			0.984	0.467					2.309	1.643					1.713	1.086
			0.854	0.698					1.439	2.034					1.957	1.325
			0.927	1.298					2.39	0.79					1.332	1.373
			0.879	0.841					1.766	0.661					1.094	0.98
			0.742	0.617					0.61	1.198					0.934	1.168
			0.635	0.594					1.793	2.181					0.978	1.157
			1.112	0.66					2.157	1.131					1.332	1.055
			0.832	2.488					1.56	1.625					1.249	0.812
			1.415	2.281					1.897	0.988					1.871	1.083
			0.957	0.915					1.258	1.002					0.922	1.684
			1.541	0.798					0.812	0.747					1.032	0.756
			0.752	2.49					0.712	1.363					0.731	1.271
			1.259	0.836					1.269	1.417					1.696	1.273
			0.972	1.514					2.245	0.602					0.904	0.719
			1.139	1.261					0.839	0.96					1.207	1.274
			1.22	1.584					1.202	1.229					1.094	0.691
			1.441	1.242					0.658	1.065					1.405	0.88
			0.846	1.518					1.743	1.418					1.012	0.782
			1.022	0.766					1.644	1.393					1.763	0.824
			1.047	0.74					1.256	0.705					0.767	0.885
			1.541	0.839					0.841	0.691					1.098	1.381
			0.884	1.468					0.878	1.368					1.186	0.827
			1.483	0.7					0.672	1.186					0.912	1.743
			0.779	0.781					0.822	1.265					1.444	0.899
			0.904	0.595					0.596	1.648					0.824	0.781
			0.642	1.189					1.341	0.837					1.095	0.877
			1.308	0.974					0.976	0.897					1.08	1.011
			0.898	0.958					1.167	0.772					1.073	1.118
			1.204	0.923					1.176	1.48					1.537	0.867
			0.964	0.836					0.749	0.765					1.003	0.836
			1.334	0.584					0.966	1.313					1.141	2.198
			2.051	1.149					1.318	0.986					1.096	0.601
			1.161	0.911					0.787	1.035					1.624	0.834
			0.904	1.181					0.732	0.743					2.951	0.981
			1.078	0.903					0.584	0.946					2.486	0.736
			0.857	0.682					1.591	1.334					0.849	0.909
			0.741	2.208					1.969	0.747					0.988	0.764
			0.868	0.979					2.195	1.044					1.459	1.074
			1.131	0.847					1.759	0.887					1.229	0.813
			1.297	0.56					1.271	1.051					1.702	0.924
			1.4	1.252					0.963	0.695					1.051	1.245
			1.788	1.273					2.615	0.741					1.609	1.271
			0.593	1.854					1.541	1.016					1.431	1.154
			1.665	0.784					0.752	1.559					1.595	0.968
			0.941	2.119					1.299	1.043					1.1	0.982
			0.728	0.374					2.063	1.036					0.831	1.616
			0.584	2.009					0.55	1.096					1.258	1.322
			0.649	0.824					0.577	1.472					1.375	1.586
			1.14	0.852					1.089	0.692					0.672	1.096
			0.882	1.435					0.561	1.018					1.613	0.992
			0.575	0.943					1.513	0.757					1.426	1.259
			1.044	1.093					0.997	2.424					0.954	2.138
			0.948	1.147					1.526	0.881					1.446	0.702
			1.275	0.879					1.665	1.756					1.474	0.823
			1.721	1.417					0.615	0.629					1.687	1.406
			0.515	0.875					1.64	0.927					1.815	1.262
			1.233	0.951					1.018	1.474					0.998	1.334
			1.157	0.947					1.917	0.834					0.921	0.863
			0.829	0.7					0.682	0.766					1.825	0.903
			0.96	0.593					1.236	0.644					2.142	1.84
			1.011	0.696					0.689	1.019					0.81	1.203
			0.823	0.633					2.078	2.096					1.242	0.703
			1.06	1.068					1.596	1.58					1.007	1.133
			1.024	1.307					0.716	1.471					0.738	0.871
			0.852	1.322					2.797	0.726					2.404	2.107
			1.146	0.734					0.993	0.869					0.882	1.103
			0.759	1.134					1.397	0.716					1.206	0.732
			1.344	1.055					0.712	1.457					1.004	1.373
			0.707	0.968					1.368	1.388					1.784	0.784
			1.133	0.816					2.162	1.254					0.833	2.372
			1.393	0.457					0.842	1.588					0.884	0.881
			0.883	1.621					1.915	2.161					1.455	0.82
			0.866	2.26					0.692	0.936					1.241	1.067
			0.906	0.947					1.014	0.958					1.309	0.583
			0.779	0.372					2.223	1.546					1.886	0.986
			0.655	0.957					0.707	1.276					0.762	1.165
			1.032	0.646					2.391	0.77					0.928	0.878
			0.921	1.266					1.384	1.374					1.784	1.765
			0.727	0.871					1.451	0.907					1.817	1.021
			0.955	0.83					0.83	0.977					1.508	0.839
			0.756	0.805					2.212	0.784					1.848	0.935
			1.52	0.821					0.752	1.261					0.913	0.815
			0.725	0.81					1.029	1.559					1.659	0.954
			0.955	0.812					1.628	1.381					0.661	1.014
			0.765	1.408					2.25	1.177					1.306	0.798
			0.659	1.205					1.5	1.063					1.883	0.827
			0.818	1.507					1.629	1.766					1.322	2.839
			1.081	1.015					1.008	1.256					1.479	1.021
			0.983	1.008					1.453	0.803					0.538	0.73
			1.35	1.758					0.869	1.198					3.729	0.78
			0.745	0.645					1.622	0.645					2.789	0.804
			0.896	0.972					0.637	1.098					0.833	0.598
			0.793	1.335					1.856	1.163					2.909	0.633
			0.833	0.763					1.326	0.893					1.996	0.598
			1.169	1.13					1.206	1.572					3.389	0.557
			1.346	0.953					1.799	0.917					0.758	0.715
			0.967	1.782					0.748	0.598					1.147	0.573
			1.161	0.923					1.62	1.335					0.86	0.654
			1.285	0.992					1.626	0.817					1.103	0.774
			1.288	0.61					1.941	1.083					0.975	0.623
			0.601	1.339					1.205	0.994					0.781	0.695
			0.851	1.347					0.967	1.297					1.62	0.234
			0.964	1.186					0.703	0.818					1.09	0.56
			1.109	1.269					0.697	1.306					1.973	0.518
			0.911	2.279					1.304	0.6					0.914	0.571
			1.116	0.739					1.576	1.212					1.15	1.551
			1.346	0.713					1.532	1.201					1.362	1.398
			0.675	0.801					1.218	0.849					1.221	1.404
			1.009	0.671					1.696	1.046					1.036	1.579
			1.08	0.846					0.74	0.735					1.033	2.209
			0.587	1.346					1.166	1.044					1.238	0.954
			0.688	1.09					2.109	1.403					0.873	0.977
			0.779	0.802					2.002	0.693					2.072	0.952
			0.893	0.927					1.426	1.689					1.881	1.614
			0.6	2.046					1.914	1.512					1.319	0.682
			0.758	1.413					1.355	1.16					0.826	1.073
			0.944	2.193					2.111	0.938					1.039	0.722
			0.945	0.451					1.534	0.525					0.829	1.025
			1.229	0.943					1.977	1.119					1.712	1.176
			2.145	0.584					1.023	2.048					0.955	1.664
			1.654	0.564					1.286	0.96					1.087	1.226
			0.653	2.003					1.514	0.784					0.935	2.282
			1.181	1.489					1.956	0.93					0.955	1.052
			2.255	1.625					0.906	0.696					1.101	0.671
			1.403	0.668					0.928	1.252					2.701	1.612
			1.201	1.383					0.741	0.601					1.566	1.569
			0.58	0.837					0.659	0.68					1.261	1.035
			1.519	0.698					1.031	0.646					1.134	1.17
			1.769	1.442					1.269	1.162					0.719	1.108
			2.283	1.282					1.723	0.869					1.816	1.319
			1.406	0.842					1.069	0.738					1.331	1.199
			0.668	0.62					1.417	0.911					0.834	1
			1.141	0.818					0.7	1.431					1.282	1.236
			1.855	1.562					1.229	1.617					0.806	0.857
			1.736	0.873					0.957	0.662					1.588	1.247
			2.113	0.837					0.668	0.904					1.04	0.903
			1.322	0.669					0.854	2.669					1.129	0.95
			0.689	1.159					1.593	1.415					1.593	1.047
			1.076	1.462					0.663	1.349					1.11	0.71
			1.576	0.847					1.497	0.819					1.352	0.833
			2.113	1.328					1.201	1.069					2.871	1.142
			1.111	0.828					2.21	1.827					0.96	1.004
			1.508	0.72					1.133	0.968					1.397	0.834
			0.92	0.94					2.901	1.885					1.001	1.368
			0.799	0.955					1.467	1.822					1.016	1.112
			0.733	1.383					2.436	1.27					1.49	0.944
			0.852	1.144					1.419	1.171					0.98	0.743
			0.961	0.796					0.795	1.879					0.629	1.046
			0.737	1.498					0.933	0.619					0.867	1.044
			0.798	1.057					1.003	2.227					1.176	1.436
			0.825	0.87					1.099	0.944					1.61	2.05
			0.924	0.762					0.88	1.594					1.671	0.863
			0.642	0.796					0.909	1.691					0.723	0.566
			0.714	3.636					1.359	1.49					0.943	1.663
			0.759	0.734					1.241	0.694					0.943	1.101
			1.24	0.506					1.162	0.916					0.823	0.665
			1.115	0.645					1.454	1.286					1.117	0.843
			0.603	1.999					2.953	0.867					1.023	1.063
			0.752	1.8					2.416	1.148					1.292	1.631
			1.616	0.669					1.079	1.977					0.957	0.727
			0.639	0.692					0.999	0.684					1.053	0.858
			1.436	0.607					2.691	0.951					0.777	0.846
			1.005	1.671					1.517	0.858					3.287	0.909
			0.921	1.473					3.435	1.223					1.06	0.979
			0.997	1.345					1.016	1.134					1.161	0.974
			0.672	1.41					1.066	1.139					0.817	1.145
			1.046	1.022					0.704	0.737					1.691	1.194
			0.965	1.399					1.237	1					1.738	0.912
			0.879	0.7					1.141	0.668					0.749	1.596
			0.913	0.618					1.425	1.175					0.938	0.837
			0.966	0.915					1.255	0.93					0.807	0.778
			1.045	1.858					1.288	1.547					0.576	1.021
			0.902	1.243					0.736	1.089					0.984	1.141
			0.818	0.77					1.329	0.726					1.053	0.877
			1.051	0.873					2.354	2.838					1.142	0.899
			0.757	0.733					1.191	1.33					0.788	0.793
			0.999	1.307					0.698	1.029					0.614	0.678
			0.754	1.06					1.742	0.729					1.592	1.117
			0.687	0.99					2.455	1.217					0.786	1.396
			1.137	1.841					0.909	2.147					0.836	1.824
			0.907	1.126					1.359	0.871					1.346	0.745
			1.254	0.809					0.854	1.02					1.375	0.836
			0.88	0.972					1.377	1.285					1.039	1.013
			0.778	1.155					1.02	0.752					1.443	1.204
			1.405	1.235					2.242	1.785					1.31	1.272
			2.037	1.063					0.53	0.651					1.756	0.937
			1.63	0.796					0.573	0.711					1.188	1.651
			1.076	0.591					2.542	0.929					1.095	1.219
			1.101	1.18					5.489	0.806					0.74	0.926
			1.346	1.119					4.717	0.665					0.723	1.354
			0.796	1.712					2.849	1.176					0.871	1.651
			0.699	1.334					0.457	0.611					1.035	1.164
			0.73	0.733					3.902	1.128					0.768	0.858
			1.414	0.734					0.873	0.831					0.843	0.83
			0.804	1.28					2.096	2.034					1.117	1.325
			1.118	0.665					1.811	1.16					1.867	1.08
			1.06	0.657					2.774	0.588					0.775	1.299
			1.036	0.738					0.794	0.823					1.229	1.366
			0.974	1.095					1.826	1.028					1.067	0.895
			1.11	3.553					1.337	1.506					1.117	1.28
			2.966	1.07					1.137	0.879					0.695	1.237
			1.318	1.36					1.266	1.783					0.758	1.154
			0.628	1.345					1.611	0.678					0.884	0.924
			0.734	1.028					0.634	0.802					1.002	2.486
			0.652	0.707					1.112	1.27					0.823	1.568
			0.671	2.255					1.885	1.26					0.841	0.559
			0.407	1.597					0.653	1.763					1.325	0.568
			1.312	2.055					1.714	1.136					0.819	1.449
			1.794	0.957					1.744	1.237					0.914	0.736
			2.116	1.322					2.68	0.88					1.044	0.755
			1.159	0.539					0.739	1.418					1.121	0.95
			1.176	1.181					2.2	0.999					1.419	0.538
			2.577	4.213					1.004	1.1					1.386	0.624
			0.764	2.519					1.497	1.197					1.537	1.409
			0.541	0.572					1.597	0.694					1.109	1.686
			0.645	1.433					1.355	0.928					0.878	1.027
			0.624	0.697					1.926	0.859					0.893	1.146
			1.17	1.46					2.386	0.786					0.74	1.749
			1.066	1.309					1.394	1.43					1.659	0.937
			0.707	1.443					2.888	1.039					1.137	0.794
			2.31	0.698					0.704	1.035					0.845	1.244
			0.582	2.002					1.142	1.091					1.285	1.405
			2.169	1.349					1.62	1.076					1.606	1.389
			1.071	2.372					1.023	0.843					1.201	0.897
			1.351	0.558					1.175	0.834					1.474	1.586
			0.719	1.087					0.726	0.935					0.736	0.969
			0.851	1.176					1.506	1.124					2.176	0.781
			1.039	0.729					0.99	1.252					1.6	0.789
			1.137	2.579					0.702	0.839					0.944	0.724
			1.153	0.908					1.003	1.252					0.941	1.032
			1.575	0.807					1.444	1.073					0.562	1.697
			1.327	1.096					1.061	1.33					1.209	0.912
			0.67	0.613					0.862	0.492					0.907	0.981
			0.975	2.197					2.518	0.662					1.155	1.214
			2.575	1.783					1.629	0.396					1.15	0.999
			1.27	0.722					0.86	3.864					0.667	1.373
			1.086	0.956					1.178	0.937					1.088	1.105
			0.907	0.915					1.08	2.208					0.72	1.07
			1.063	0.763					0.686	1.551					1.215	0.933
			1.345	1.017					1.299	0.834					1.077	1.263
			1.16	0.629					2.656	2.424					1.209	1.333
			0.88	0.731					1.445	2.569					0.897	0.659
			1.883	0.883					1.397	0.907					2.264	0.951
			0.951	1.442					1.964	1.254					1.054	1.082
			0.986	0.979					1.453	1.205					0.767	0.942
			0.978	1.023					4.244	2.269					1.107	1.26
			0.981	0.928					1.473	1.001					0.795	1.128
			1.204	0.766					0.795	0.895					2.059	0.783
			1.2	0.938					1.348	2.467					0.792	1.036
			1.228	1.378					1.38	0.886					1.131	1.741
			0.681	0.826					0.559	1.663					1.152	1.334
			1.039	1.154					1.342	1.138					0.914	1.106
			1.264	0.79					1.046	1.218					0.597	1.11
			0.797	0.416					0.835	1.356					1.053	0.829
			0.862	1.093					1.276	0.807					1.014	1.53
			1.302	0.584					0.775	2.018					0.74	0.668
			1.128	3.545					1.044	1.511					1.353	1.298
			0.736	1.479					0.82	1.498					1.538	0.714
			1.05	1.003					1.612	1.64					0.605	1.277
			0.966	1.56					0.69	0.775					1.588	0.754
			1.643	1.782					1.64	1.731					1.063	1.074
			0.773	0.741					0.934	1.008					1.313	0.932
			1.07	1.528					0.831	1.285					0.818	0.986
			1.027	0.735					1.148	2.227					0.922	1.211
			1.219	1.036					0.784	2.166					0.927	1.204
			1.413	0.593					2.667	2.681					1.517	2.16
			1.323	0.794					2.003	1.376					1.297	0.974
			1.094	0.899					1.392	1.216					0.706	0.854
			1.105	0.867					2.6	1.169					0.613	1.291
			0.719	0.65					0.989	1.246					1.06	1.012
			0.637	0.813					1.37	0.815					0.751	1.117
			1.315	2.035					1.425	0.967					0.763	1.199
			1.101	1.061					1.016	2.098					1.1	1.518
			1.357	0.694					0.785	0.654					1.718	1.032
			2.61	0.855					1.579	1.64					1.252	1.736
			1.324	0.753					1.736	0.863					0.635	1.286
			2.264	0.761					1.527	3.247					0.864	0.732
			1.5	1.002					0.791	1.353					0.863	0.941
			2.284	0.806					1.856	0.948					0.979	1.21
			3.017	0.979					1.738	0.861					0.782	0.868
			2.892	0.849					0.986	1.437					0.845	1.684
			1.677	1.783					1.183	1.054					1.473	0.918
			3.43	2.176					1.312	0.92					0.627	1.208
			0.934	0.699					1.352	0.647					1.1	0.855
			1.682	1.132					1.116	1.974					1.041	1.264
			1.509	1.048					1.951	0.782					1.277	0.701
			1.232	1.144					1.101	0.753					0.863	0.649
			0.859	1.018					1.769	1.115					0.661	1.434
			0.974	1.015					1.798	0.85					0.917	0.592
			0.735	0.865					1.865	0.787					0.812	1.077
			1.166	0.643					0.749	1.22					0.988	0.991
			1.037	1.753					0.583	1.693					0.672	2.232
			0.765	1.053					1.24	1.48					0.977	0.965
			0.815	2.368					2.592	3.023					0.546	0.904
			0.812	1.277					2.21	0.806					0.979	1.486
			0.77	0.815					1.97	1.211					0.865	0.371
			0.852	1.184					1.465	1.478					0.817	0.459
			0.975	2.038					0.86	0.992					1.358	0.56
			0.904	0.813					1.073	0.851					0.782	2.127
			0.999	1.034					0.9	1.141					1.5	0.528
			0.627	0.607					1.888	0.652					1.863	0.708
			1.191	1.185					1.741	2.115					1.097	0.729
			1.048	0.966					2.041	1.309					0.989	0.798
			0.93	0.85					2.082	1.225					1.267	0.66
			1.051	1.41					0.765	0.818					0.658	0.6
			1.578	0.763					1.32	1.751					0.831	2.338
			1.089	0.955					0.693	1.603					1.025	1.24
			1.328	0.561					1.576	0.943					0.785	0.848
			0.82	1.118					1.121	1.297					1.113	1.208
			1.065	0.348					1.167	0.993					0.985	1.47
			1.236	0.984					1.537	1.265					0.61	1.521
			0.782	1.955					1.573	0.957					1.28	1.322
			0.94	0.484					0.874	1.364					0.927	1.187
			0.706	1.6					1.537	1.183					1.116	0.84
			0.885	1.036					2.372	0.981					1.086	2.691
			0.954	0.795					0.993	0.742					0.958	1.314
			0.878	1.207					1.343	0.92					1.08	1.142
			1.236	0.786					0.948	0.617					1.308	1.449
			0.671	0.784					1.14	0.734					0.834	1.934
			1.252	1.113					0.724	1.237					0.854	1.167
			0.895	0.936					0.842	0.954					0.758	1.076
			0.896	0.967					1.279	4.677					1.865	0.99
			2.86	1.058					1.894	0.703					1.24	1.792
			1.642	1.091					1.217	1.324					0.764	1.45
			0.932	2.285					3.33	0.928					1.018	1.604
			2.113	1.504					2.8	1.44					0.911	1.717
			1.871	1.298					0.582	0.649					0.658	2.087
			2.09	1.359					1.125	2.27					1.296	1.369
			1.277	1.107					0.917	0.899					0.786	0.56
			1.728	0.926					0.971	1.831					0.964	1.481
			1.121	1.039					0.84	1.17					0.729	1.716
			1.676	1.155					1.592	0.947					1.404	1.4
			1.808	1.192					1.267	1.541					0.848	2.008
			0.383	2.662					1.32	0.86					0.91	0.832
			1.335	1.012					1.716	1.141					0.835	1.005
			1.208	1.857					2.24	0.852					1.116	1.23
			1.258	1.258					0.898	0.764					0.802	1.918
			1.076	1.5					1.019	1.059					1.032	0.971
			1.466	1.834					1.102	0.627					0.705	1.28
			1.356	1.359					0.843	1.201					0.663	2.681
			1.01	1.203					1.703	1.035					1.703	1.556
			1.055	1.127					0.91	1.426					1.09	0.904
			1.127	3.392					1.005	1.264					0.829	0.883
			1.801	0.865					2.257	0.847					0.864	1
			1.436	0.902					1.936	0.81					0.768	2.846
			0.994	1.194					3.147	1.44					2.593	1.406
			0.765	1.231					1.6	1.717					1.944	1.104
			1.044	1.357					1.586	1.055					0.804	0.762
			1.052	1.364					1.008	1.048					0.637	0.942
			1.233	0.601					1.209	0.927					0.663	1.248
			0.947	0.831					1.053	0.991					0.623	1.277
			1.224	0.974					1.381	0.838					0.607	1.099
			0.817	0.742					1.707	0.73					1.055	1.028
			1.031	0.73					1.755	1.355					0.416	0.818
			1.559	0.869					1.917	1.548					0.581	1.087
			2.161	1.042					1.289	1.498					0.754	0.957
			0.989	1.658					1.175	1.215					1.632	1.166
			0.661	1.077					1.395	1.611					1.338	0.736
			1.101	1.051					1.816	3.036					2.225	0.69
			0.844	1.008					1.461	1.162					0.94	1.848
			0.941	1.415					2.577	0.768					0.867	1.449
			0.645	0.84					0.95	2.545					1.19	0.989
			1.316	0.674					1.669	1.021					0.573	0.898
			1.209	0.809					2.093	1.404					1.268	1.982
			1.053	0.751					0.718	1.693					1.035	1.506
			0.766	0.778					1.896	1.671					1.134	0.944
			1.417	1.179					1.895	2.309					1.17	1.622
			0.689	0.995					0.873	1.929					0.732	1.064
			0.808	0.744					0.823	2.909					0.99	1.072
			0.939	1.028					1.554	0.99					0.703	1.084
			0.763	1.069					0.918	0.716					0.913	1.335
			0.801	1.702					1.484	2.022					0.827	1.004
			1.163	0.953					0.987	1.189					1.402	0.848
			0.944	0.783					0.786	1.341					0.649	0.708
			0.931	1.396					1.483	2.761					0.8	1.167
			0.748	1.065					1.683	1.258					0.864	3.282
			0.784	1.101					1.482	0.813					1.415	0.962
			0.871	1.122					1.633	0.97					0.571	2.327
			1.225	0.727					1.134	1.75					1.136	0.986
			0.729	1.173					0.839	1.073					0.769	1.437
			0.827	0.842					1.946	1.174					1.42	0.9
			1.728	1.018					2.147	1.487					0.732	0.675
			0.91	1.068					1.071	1.799					1.821	0.619
			0.688	0.756					1.701	0.84					1.492	1.837
			0.769	1.246					0.699	1.602					0.651	0.899
			0.846	0.697					2.003	1.207					0.738	0.905
			1.737	1.005					1.03	1.516					0.671	0.996
			0.878	0.666					0.839	0.768					0.652	0.781
			0.878	1.346					1.127	1.115					1.46	1.773
			1.186	0.986					1.121	0.771					0.888	1.121
			0.711	0.922					0.714	1.126					0.594	1.277
			1.126	1.497					1.277	3.13					0.849	0.852
			1.183	0.716					0.799	1.051					1.312	0.848
			1.483	1.443					0.965	0.993					1.503	0.644
			0.699	1.254					1.185	2.09					1.731	0.933
			1.574	2.054					1.045	0.945					0.676	1.17
			1.968	0.957					0.586	1.086					0.859	0.871
			0.904	2.097					0.668	2.396					1.601	0.929
			0.8	1.144					0.99	0.924					0.975	1
			0.797	0.833					1.043	0.853					0.638	1.215
			0.862	0.84					0.944	1.327					1.262	1.795
			0.785	0.741					0.794	1.623					0.582	0.831
			1.118	0.569					1.226	1.168					1.685	1.178
			1.131	0.555					1.153	1.453					1.17	0.603
			2.345	1.552					0.921	0.929					1.035	2.661
			1.835	1.879					1.322	1.065					1.502	0.775
			0.71	1.12					1.073	0.814					1.125	0.745
			2.019	0.492					0.933	0.732					1.768	0.89
			1.258	0.49					0.826	0.853					1.062	0.782
			1.257	1.042					1.659	1.114					0.89	2.15
			1.044	0.392					1.253	0.7					0.936	1.738
			1.077	0.584					2.097	1.015					0.693	0.663
			0.591	1.329					0.952	1.208					0.977	0.99
			0.587	2.283					1.368	1.271					0.812	0.834
			0.59	0.99					1.354	1.682					0.882	0.831
			1.378	1.889					2.132	0.776					0.612	0.798
			2.648	1.58					1.401	1.166					1.244	0.46
			1.218	1.252					1.373	1.377					1.38	0.83
			0.715	1.21					0.972	0.827					0.908	0.303
			0.618	1.222					2.139	0.877					1.471	0.352
			0.996	1.501					2.12	0.81					0.966	1.04
			0.836	1.263					1.589	0.451					0.574	1.532
			1.059	1.308					3.075	0.601					0.849	0.406
			1.319	0.79					1.944	1.545					1.479	0.462
			0.592	0.719					0.991	1.127					1.032	1.775
			0.617	0.803					1.477	0.72					0.677	3.448
			0.614	1.089					1.534	0.799					1.059	0.419
			0.416	1.046					1.594	1.449					2.564	1.614
			0.728	1.064					0.983	0.951					0.957	0.628
			2.509	0.922					1.627	1.37					1.037	1.302
			1.41	0.963					1.059	1.206					0.534	0.665
			1.886	1.279					0.774	2.255					1.089	2.127
			1.444	0.991					1.74	1.142					1.179	0.474
			1.31	1.2					0.873	0.997					0.944	0.865
			1.919	1.01					1.268	0.573					1.609	1.186
			1.157	1.091					0.736	1.088					0.825	1.453
			1.036	0.859					0.675	1.181					1.121	1.047
			0.638	1.08					1.215	0.976					0.782	1.133
			0.961	1.14					2.521	1.089					0.84	1.298
			0.765	0.898					1.22	1.273					0.786	1.841
			1.254	1.262					0.936	1.499					1.594	1.507
			0.839	1.158					0.942	0.762					0.702	1.354
			1.135	1.192					1.284	0.545					1.664	0.61
			2.489	0.672					1.236	1.617					0.923	0.774
			0.848	1.012					1.436	1.426					1.025	1.261
			0.816	1.266					1.093	3.093					1.321	1.531
			0.635	0.938					1.622	1.427					0.85	0.929
			1.096	1.132					1.132	1.67					1.654	0.982
			0.945	0.857					0.973	1.169					0.891	1.921
			0.696	1.299					0.649	1.831					0.733	0.72
			0.84	2.018					1.307	0.908					1.76	0.84
			0.996	2.343					1.297	0.843					0.721	1.078
			1.068	0.541					0.894	1.418					0.627	1.74
			0.969	0.445					0.882	1.696					1.559	0.643
			1.363	1.66					1.505	1.081					0.896	1.07
			0.927	0.958					1.081	2.082					1.03	1.674
			0.749	0.838					2.198	0.641					0.745	0.807
			0.971	1.062					1.03	2.135					1.77	0.959
			0.74	1.107					1.112	2.08					1.14	0.898
			1.015	0.684					0.762	0.874					0.737	0.639
			1.46	0.942					1.265	1.098					0.756	1.275
			1.249	0.976					1.419	2.09					0.611	1.841
			0.705	1.163					1.143	0.951					0.619	1.603
			1.411	0.837					1.79	1.58					0.433	0.727
			0.892	0.815					0.838	1.153					0.768	1.385
			1.196	1.027					0.88	3.227					0.796	2.119
			0.892	1.038					0.778	0.819					0.681	0.929
			0.709	0.947					2.153	0.689					0.61	1.221
			0.876	1.129					0.979	0.888					1.159	1.02
			0.782	1.544					1.23	0.967					1.204	1.009
			0.821	1.179					1.17	2.218					0.933	0.706
			0.647	0.904					1.22	2.166					0.898	1.008
			0.63	1.806					1.117	1.239					0.753	1.45
			0.712	0.741					0.901	1.995					0.693	0.724
			1.201	1.067					1.376	1.428					0.949	1.093
			1.365	0.754					1.051	1.127					0.578	0.999
			1.383	0.702					1.195	1.287					1.147	2.333
			0.984	0.928					0.937	0.785					1.344	2.005
			1.716	1.12					1.821	3.3					0.924	0.762
			0.743	0.814					1.633	2.329					0.784	0.901
			1.07	0.664					2.858	1.815					1.201	0.833
			1.252	1.901					1.488	1.365					0.94	0.859
			0.893	0.996					1.21	1.609					1.004	2.408
			0.851	0.931					1.217	0.928					1.356	0.682
			0.726	1.263					0.916	0.47					0.594	0.834
			0.842	0.773					1.197	1.007					1.229	0.937
			0.892	1.317					2.22	1.278					2.206	1.393
			0.873	1.034					1.599	2.931					0.653	1.543
			0.662	1.032					0.682	2.646					0.946	0.941
			0.681	0.797					1.601	0.796					1.117	1.157
			1.148	0.86					1.235	1.35					0.992	0.555
			1.093	0.903					1.266	1.294					1.186	0.509
			1.029	1.16					1.283	1.421					0.938	0.406
			0.577	0.764					2.926	1.846					1.396	2.541
			0.981	4.19					1.272	0.636					1.054	0.509
			0.983	1.357					1.421	0.92					1.046	1.735
			1.536	1.449					3.795	1.068					0.717	1.051
			0.919	1.768					1.209	1.057					0.95	1.461
			0.964	2.354					1.333	0.826					1.123	0.924
			0.605	2.113					0.762	2.704					1.164	1.012
			1.349	1.1					2	1.38					1.112	1.182
			0.755	2.43					0.997	0.911					1.122	1.836
			1.401	1.44					1.528	1.463					1.233	0.936
			1.285	1.592					0.831	0.908					1.506	1.194
			0.963	1.487					1.091	1.29					1.11	0.811
			1.71	4.085					1.113	0.871					1.084	0.841
			1.391	1.876					0.71	1.248					0.702	2.001
			0.72	0.62					0.77	0.947					2.371	0.942
			0.699	0.755					2.501	0.775					1.524	1.319
			0.701	0.74					1.809	1.344					1.472	0.89
			1.423	0.852					1.562	0.922					0.855	1.077
			1.327	0.85					4.02	0.856					0.802	1.586
			0.954	1.123					0.774	1.177					1.339	0.75
			0.743	1.927					2.091	1.921					0.806	1.068
			1.119	1.079					1.268	3.363					1.361	0.836
			0.559	0.971					1.453	0.908					1.788	0.905
			1.409	0.954					1.339	1.012					2.387	1.313
			3.017	1.602					1.381	1.083					1.496	0.899
			0.562	0.965					1.648	1.514					0.997	1.972
			0.682	0.836					2.211	0.74					0.73	0.997
			0.846	0.832					1.749	1.74					0.711	0.798
			0.896	0.852					2.22	1.462					0.78	1.028
			0.694	0.926					1.292	1.235					1.059	0.66
			1.073	1.638					1.253	1.159					1.335	0.838
			1.139	0.775					1.294	1.137					0.686	1.206
			0.697	1.01					1.028	0.694					1.092	0.904
			0.698	1.35					0.802	1.319					0.756	1.735
			1.375	1.229					2.404	1.642					0.883	0.772
			0.867	1.173					0.619	0.809					0.736	0.608
			0.79	1.041					0.99	1.081					1.805	1.239
			0.827	1.522					1.518	0.961					1.657	1.606
			0.679	1.405					1.133	0.896					1.354	0.648
			0.811	2.147					1.597	0.71					1.43	1.021
			1.135	0.742					1.165	0.805					1.4	0.56
			0.947	0.902					2.017	1.582					0.952	1.957
			1.035	0.672					0.782	1.131					1.094	1.065
			0.749	1.333					1.629	1.67					0.651	0.686
			1.013	0.813					3.232	0.763					0.756	1.386
			0.786	1.304					1.608	1.125					0.713	1.195
			0.633	2.077					1.638	1.162					0.888	1.348
			1.427	0.627					1.168	0.626					1.609	0.591
			0.714	0.907					0.96	0.734					1.056	0.684
			0.988	0.92					1.324	2.261					1.564	1.078
			1.194	1.001					1.6	0.687					0.769	0.651
			1.595	2.538					0.99	1.321					1.041	0.652
			1.406	0.924					1.072	1.312					0.644	0.814
			1.265	1.177					1.196	0.742					0.694	0.8
			1.119	1.373					1.072	2.522					1.214	1.356
			0.744	0.855					1.238	2.233					1.551	0.578
			0.615	0.734					1.107	1.143					0.98	0.981
			1.472	1.311					0.993	1.323					0.985	1.214
			1.67	0.967					0.963	1.43					0.685	0.967
			1.343	0.642					1.071	1.732					1.071	0.731
			2.343	0.928					0.722	1.622					0.788	1.339
			1.738	2.531					2.023	1.705					1.509	0.642
			2.231	0.928					1.199	2.035					0.855	1.12
			1.598	1.744					0.695	1.323					0.976	0.781
			0.948	1.862					1.283	1.816					0.715	1.119
			1.255	0.37					1.385	0.829					1.569	0.953
			1.111	2.229					0.589	2.886					1.539	0.623
			1.117	1.885					0.722	2.073					1.358	2.954
			1.133	1.53					1.633	1.158					0.642	0.374
			1.019	1.115					0.679	1.405					1.104	1.128
			0.974	2.302					0.637	1.041					0.843	1.348
			1.013	2.852					0.999	2.31					1.51	1.724
			0.644	0.972					1.754	2.726					1.299	1.023
			0.909	0.892					0.965	1.275					1.197	1.284
			0.715	1.197					1.359	1.837					1.042	1.487
			0.935	1.119					0.872	1.658					0.765	1.153
			0.676	0.732					1.276	2.048					0.847	1.026
			0.726	0.578					0.966	1.51					0.668	1.479
			0.806	0.913					0.924	0.92					0.697	0.593
			0.845	1.321					1.711	1.398					0.655	1.667
			0.813	0.804					1.38	2.099					0.487	0.935
			0.603	0.851					1.329	1.056					0.966	0.878
			1.38	0.943					1.04	1.674					0.62	1.007
			1.203	0.857					1.975	1.132					0.608	1.123
			0.612	0.889					0.979	0.782					0.457	3.144
			0.942	0.895					0.825	1.061					0.599	1.027
			0.984	0.932					1.001	1.046					0.7	1.126
			0.983	2.473					0.795	1.191					0.531	1.708
			0.704	0.966					2.618	0.616					0.69	1.745
			2.956	0.945					1.709	0.93					0.687	1.252
			4.309	1.237					0.947	0.821					1.092	1.916
			1.465	1.352					0.857	1.246					0.807	1.065
			1.916	0.607					1.026	2.149					0.997	1.248
			2.42	1.675					1.126	1.218					0.896	0.676
			0.856	1.354					1.316	1.17					1.223	1.096
			0.841	1.333					1.469	1.239					0.884	0.766
			1.795	1.063					3.128	0.706					1.471	1.802
			0.662	1.015					1.016	1.034					1.003	1.486
			0.665	0.929					0.929	1.379					0.665	0.716
			0.617	1.087					1.804	1.101					0.577	0.862
			0.906	0.948					0.964	1.03					0.965	1.078
			1.239	0.765					1.246	0.337					1.009	1.446
			0.875	0.988					2.341	0.943					1.235	0.917
			1.237	0.838					1.193	1.454					0.72	1.105
			0.876	1.044					2.563	0.791					1.203	0.809
			1.5	0.922					0.871	1.462					1.138	0.82
			1.084	1.003					1.124	1.882					0.914	0.964
			1.178	0.576					1.801	1.211					1.312	0.562
			1	1.328					1.341	2.185					0.932	1.156
			0.961	0.851					1.739	0.88					0.954	0.82
			0.771	1.341					1.464	2.451					1.515	1.001
			0.648	0.727					1.218	1.937					1.001	0.696
			0.761	1.564					1.267	1.206					0.738	0.803
			1.115	0.938					1.544	0.874					0.833	1.174
			0.862	0.94					2.322	2.089					0.611	1.824
			0.756	1.455					0.832	1.349					0.856	0.991
			1.199	1.096					1.252	0.664					1.286	0.877
			0.904	0.794					1.946	1.359					2.72	1.135
			0.771	2.362					1.18	1.386					0.686	0.599
			0.576	1.006					0.991	0.848					1.199	0.937
			0.653	0.814					0.628	1.022					0.729	1.085
			1.203	1.419					0.8	1.679					1.108	1.2
			0.843	0.744					1.827	0.86					0.739	0.59
			1.154	1.591					0.905	1.428					1.092	0.698
			0.542	0.945					0.864	1.436					1.02	1.158
			1.128	0.808					1.409	1.619					0.794	0.976
			1.764	2.148					1.279	1.019					0.733	1.344
			0.904	1.66					1.055	1.04					0.595	0.675
			1.023	0.792					0.968	1.897					0.858	1.845
			1.206	0.988					1.825	0.849					0.645	1.217
			2.14	0.92					1.049	0.875					0.797	0.636
			3.301	0.922					1.015	2.059					0.689	0.567
			1.459	2.381					0.938	1.558					0.915	0.458
			2.452	1.271					1.04	2.394					0.599	0.756
			0.77	0.79					3.17	1.845					1.161	1.264
			1.324	1.215					1.016	1.355					0.642	0.883
			0.515	0.74					1.644	2.303					1.155	0.754
			1.163	1.531					1.485	1.109					1.36	0.8
			1.873	0.671					1.314	0.832					2.008	1.884
			1.586	1.329					1.368	1.67					0.987	1.49
			1.981	2.594					1.729	1.677					0.938	0.85
			2.35	1.254					1.543	1.319					0.651	1.135
			0.772	0.675					1.945	2.081					0.58	1.74
			1.4	1.863					1.222	2.478					0.727	0.85
			1.44	1.497					1.302	1.538					1.554	0.78
			1.584	1.819					0.735	2.815					0.672	0.736
			1.634	0.424					1.529	1.516					0.869	0.917
			1.207	1.948					1.452	1.069					1.029	0.739
			0.781	1.221					1.372	2.227					1.115	1.504
			0.547	0.656					2.983	0.89					0.969	0.849
			0.865	1.363					3.058	1.834					0.903	0.659
			1.19	1.13					1.551	1.361					0.694	1.71
			0.957	0.826					1.475	1.062					0.685	0.682
			1.415	1.329					0.786	1.368					0.997	1.108
			1.015	1.465					0.989	1.053					0.832	1.131
			1.339	0.957					1.002	0.717					1.039	1.064
			0.981	1.073					1.226	1.277					1.602	0.981
			1.272	1.003					0.985	0.809					1.028	0.844
			0.801	1.581					1.301	0.477					1.033	1.3
			0.924	0.648					1.144	2.044					1.068	0.736
			0.841	0.919					2.037	0.83					0.714	1.22
			0.722	0.792					1.202	1.093					0.948	1.492
			1.033	0.672					0.91	1.874					1.173	0.85
			1.442	0.78					0.786	0.918					1.339	1.654
			0.863	1.227					0.759	0.766					1.219	0.58
			0.813	0.989					1.484	0.734					1.154	0.9
			0.815	0.865					1.419	1.305					1.236	2.784
			1.098	0.94					0.759	0.969					1.134	0.599
			0.8	1.031					0.974	0.975					1.392	0.947
			1.391	0.825					1.189	0.888					1.311	2.201
			0.805	1.009					3.759	1.019					1.075	1.153
			0.678	1.102					1.593	1.905					0.729	1.18
			2.362	0.996					0.627	1.141					0.564	1.007
			1.596	0.569					2.178	0.798					1.511	1.2
			0.833	1.509					1.179	1.354					1.064	3.215
			0.821	0.764					1.147	2.066					0.918	2.621
			0.751	1.456					1.352	1.73					0.994	0.575
			0.626	2.546					1.025	1.263					1.09	1.739
			1.084	0.857					1.104	0.944					0.657	0.78
			1.645	0.967					1.612	1.521					0.608	1.556
			2.006	1.189					1.055	1.132					0.606	0.896
			2.098	1.254					1.351	2.184					0.88	0.728
			1.254	1.472					0.94	2.781					0.939	0.539
			1.871	1.64					1.197	0.829					0.559	0.732
			2.243	2.181					0.777	1.456					0.657	0.933
			0.681	0.658					0.912	1.256					0.656	0.813
			1.329	1.436					2.841	1.435					1.579	0.827
			1.923	1.82					1.15	1.817					0.779	1.344
			1.21	1.471					0.912	1					1.089	1.517
			1.208	1.129					0.635	1.267					0.856	1.186
			1.698	1.533					0.909	1.45					1.357	1.327
			0.967	1.022					0.867	1.506					1.066	0.678
			1.14	0.947					0.925	0.972					0.914	0.626
			1.389	0.963					1.122	1.228					1.382	0.58
			0.633	1.406					0.665	1.371					1.017	1.381
			1.157	0.883					1.013	1.271					0.865	0.862
			1.81	1.347					1.207	0.668					1.514	0.89
			2.099	1.144					1.512	1.587					0.628	0.672
			0.874	0.773					1.603	1.075					0.628	0.816
			0.839	2.923					1.76	0.98					1.101	1.131
			0.734	2.01					2.322	0.683					0.655	2.019
			1.283	2.268					1.374	0.863					0.844	0.986
			1.413	2.621					1.642	1.051					0.524	1.091
			1.655	2.124					0.864	2.23					0.567	0.927
			2.333	3.619					0.817	3.596					0.738	0.565
			0.857	1.632					1.671	1.755					0.49	1.039
			1.391	1.248					0.69	0.689					0.721	0.991
			0.576	1.535					1.181	2.402					2.836	0.896
			0.671	2.49					1.258	1.291					0.581	1.155
			0.726	0.928					1.576	0.937					0.559	1.59
			1.996	0.804					0.888	1.352					0.511	0.711
			0.608	1.016					0.871	0.904					0.658	0.974
			1.392	1.107					1.78	0.86					0.778	1.362
			1.386	0.837					1.235	1.592					1.944	1.925
			0.777	0.714					1.109	1.412					0.976	0.923
			1.306	1.153					1.038	1.425					1.07	0.745
			1.095	1.468					0.827	1.353					0.783	0.735
			0.875	2.143					1.008	1.077					0.814	1.63
			0.687	0.682					1.338	0.594					1.838	0.7
			1.247	1.177					1.662	1.083					0.763	1.437
			1.696	1.151					1.118	1.527					0.832	0.773
			1.114	1.431					0.624	1.066					0.764	1.723
			0.783	0.621					1.867	0.654					0.773	1.485
			0.696	1.145					1.231	1.276					0.727	0.832
			0.821	1.68					1.266	1.387					1.062	0.798
			1.868	1.372					0.925	1.001					0.995	0.766
			1.302	0.825					1.198	0.651					0.729	0.728
			2.029	1.308					0.928	1.088					0.883	0.589
			1.738	1.045					2.166	1.296					1.271	0.791
			1.946	0.966					1.223	1.43					0.659	0.851
			2.322	2.378					1.051	1.354					1.01	0.985
			0.909	0.951					1.758	1.236					0.981	1.456
			0.677	1.024					1.214	1.552					0.622	0.967
			0.975	0.977					1.184	1.028					0.669	0.796
			0.997	1.126					1.24	1.545					2.013	1.075
			1.262	1.07					0.674	1.263					0.995	1.503
			0.702	0.682					1.629	1.732					1.097	0.898
			0.552	1.863					1.995	1.319					0.643	1.224
			1.036	0.707					1.761	2.043					0.665	0.782
			0.965	0.616					2	1.046					1.023	0.793
			2.177	0.797					0.694	2.461					0.734	1.601
			0.977	2.42					2.486	1.344					0.746	1
			1.567	0.772					2.227	3.391					1.171	0.553
			0.662	0.812					2.939	2.283					1.002	0.817
			0.723	1.581					0.948	0.832					1.325	2.85
			0.791	0.715					0.728	0.905					0.982	0.853
			0.689	0.926					1.111	1.264					0.741	0.6
			1.11	0.964					0.901	2.626					1	0.574
			0.841	0.872					0.725	1.197					0.804	0.784
			1.02	2.322					1.238	1.302					0.778	1.578
			1.031	0.925					2.597	1.262					0.674	0.595
			0.798	1.095					1.227	1.844					1.213	1.587
			1.108	0.69					0.85	0.981					1.557	1.618
			1.069	0.765					0.501	1.561					1.437	0.494
			0.792	1.033					1.849	0.83					1.23	1.094
			0.836	0.696					1.704	0.706					0.82	1.087
			0.8	0.715					1.214	3.089					0.91	1.431
			0.718	1.446					1.987	1.644					1.018	1.487
			1.072	1.603					0.798	2.355					0.787	0.738
			0.978	0.878					2.271	1.232					0.784	1.486
			2.752	1.262					1.261	0.819					0.641	0.731
			1.119	2.122					1.215	1.147					1.576	0.533
			1.203	1.748					1.265	2.682					0.667	0.927
			1.433	1.329					0.979	1.91					1.059	1.024
			1.552	1.162					0.907	0.861					1.429	1.083
			2.209	1.688					1.215	1.627					1.011	0.862
			1.002	2.232					1.754	2.561					1.211	0.83
			2.442	2.551					1.009	1.184					1.011	1.007
			0.653	0.463					1.223	1.457					0.663	0.633
			0.995	1.721					1.449	2.072					1.382	0.902
			3.227	1.475					1.304	1.055					1.002	0.874
			2.199	1.387					1.446	1.905					1.256	1.23
			1.224	1.173					2.045	1.02					0.901	0.894
			0.683	0.848					1.046	1.244					1.385	1.296
			1.201	1.048					1.116	1.54					1.563	0.593
			0.783	1.941					1.774	0.981					1.679	1.236
			0.939	1.287					1.365	2.473					1.115	1.611
			0.849	1.091					1.749	1.066					1.502	1.292
			0.915	0.786					3.731	0.874					1.821	0.904
			0.948	1.159					1.176	1.106					1.28	0.633
			1.081	1.229					1.452	1.258					2.068	1.851
			0.739	1.053					2.046	1.108					1.568	0.914
			0.777	0.769					1.861	1.881					1.624	0.874
			2.124	1.249					1.169	1.133					0.58	0.762
			0.898	1.022					1.326	0.797					1.011	1.251
			0.649	2.8					0.87	0.828					0.711	1.066
			0.942	1.176					0.697	1.201					1.41	1.14
			0.839	1.661					2.067	1.09					0.801	0.995
			0.684	2.027					1.272	0.665					0.722	0.765
			1.014	1.599					1.604	0.671					0.845	1.412
			0.825	1.67					1.237	0.826					0.922	1.034
			1.236	2.12					0.711	0.64					1.169	0.638
			0.874	1.506					1.458	0.609					1.061	0.842
			2.182	1.948					2.057	1.461					1.364	1.908
			1.719	1.198					1.789	2.381					1.012	0.933
			2.202	1.125					0.773	1.821					0.658	0.645
			2.553	2.401					1.101	0.897					1.028	0.757
			0.748	0.925					1.573	0.966					2.358	0.966
			2.331	0.965					1.74	0.715					0.804	0.811
			2.031	1.046					2.918	1.045					1.662	1.852
			1.96	0.851					1.714	1.416					1.718	1.099
			1.773	1.065					1.292	2.115					0.81	1.185
			2.429	0.942					2.266	0.778					0.72	0.75
			1.487	1.004					1.428	1.31					0.914	0.683
			1.742	0.832					2.348	1.359					1.007	1.009
			1.492	1.148					0.965	0.71					0.562	0.716
			0.879	0.686					1.604	1.025					0.547	1.925
			0.818	1.166					1.45	2.355					1.227	1.253
			0.629	0.971					1.161	0.762					0.892	0.614
			1.384	0.736					1.248	1.028					2.706	1.231
			1.253	0.646					1.043	2.591					1.041	2.304
			1.129	1.616					1.927	0.705					1.028	0.584
			0.655	0.642					1.212	1.07					0.935	1.11
			0.921	0.826					2.283	0.966					0.641	0.889
			1.118	1.028					1.776	1.012					0.708	1.542
			1.03	1.563					0.918	0.73					1.212	0.512
			0.79	1.119					1.366	0.705					1.417	1.082
			1.003	0.976					0.818	1.422					1.238	0.937
			1.726	0.848					1.819	1.82					0.727	1.077
			0.873	1.232					1.446	1.263					1.16	1.093
			0.759	0.829					1.953	0.84					1.791	1.844
			1.471	0.752					0.71	1.242					0.946	0.897
			0.885	1.358					1.186	1.721					1.19	0.649
			1.182	1.017					1.788	0.908					0.914	1.228
			0.677	0.802					1.487	0.811					0.967	1.004
			0.799	0.637					0.871	2.514					0.984	0.687
			1.383	0.632					1.85	1.028					0.897	1.294
			0.752	0.697					1.488	0.898					1.491	1.011
			1.861	0.734					1.263	1.113					1.269	1.309
			1.079	0.945					0.701	1.285					0.823	0.735
			0.728	2.618					1.332	1.12					0.749	1.216
			1.07	1.444					1.259	1.862					1.911	0.797
			1.627	1.999					0.893	0.77					0.979	0.903
			1.959	1.821					0.714	1.279					0.852	0.866
			0.712	0.686					0.88	0.69					0.749	2.124
			0.981	0.974					2.19	0.854					0.894	1.492
			0.758	0.595					1.053	0.786					0.665	1.246
			0.707	1.339					1.07	1.227					0.929	0.814
			0.594	1.951					1.241	1.179					0.696	1.371
			0.782	1.469					0.742	2.318					1.619	1.116
			0.955	1.436					0.689	0.89					0.582	0.726
			0.821	1.536					0.957	0.629					0.966	1.404
			0.685	1.337					0.861	0.837					0.735	0.654
			0.7	1.979					0.903	2.096					1.205	0.728
			0.935	1.083					0.931	1.152					0.968	1.05
			0.709	1.588					0.921	1.472					0.695	0.85
			1.158	1.713					1.478	1.718					1.259	1.124
			1.182	1.981					0.723	0.762					1.211	1.268
			1.397	2.627					1.695	1.477					0.926	0.731
			0.735	0.505					1.913	0.98					0.599	0.899
			3.342	0.646					0.959	0.528					1.794	0.57
			1.207	1.212					0.764	0.791					1.212	1.463
			1.753	1.111					3.113	1.443					1.124	1.407
			1.614	0.659					1.236	1.285					0.684	0.927
			2.5	0.934					1.322	1.021					1.171	1.161
			2.935	1.407					1.032	0.638					0.823	1.208
			2.503	0.696					0.935	1.492					1.164	1.072
			1.878	0.783					1.136	1.729					1.554	0.669
			1.378	0.738					1.476	1.893					1.342	1.193
			1.646	0.937					1.135	0.798					0.744	0.672
			1.205	2.923					1.328	0.711					1.218	1.838
			1.227	1.996					1.176	0.812					1.407	1.429
			1.352	1.089					1.152	2.094					0.617	1.08
			0.761	0.656					1.629	0.694					1.165	1.064
			1.94	0.985					0.893	0.857					1.001	0.833
			1.2	1.897					0.879	1.392					1.128	1.555
			1.285	1.262					0.911	1.201					0.739	1.379
			1.012	1.045					1.212	1.119					1.321	0.885
			0.922	1.941					1.283	1.544					0.683	1.335
			0.718	1.349					1.011	1.35					1.92	0.598
			1.061	1.516					1.096	0.803					0.767	0.814
			1.549	2.162					2.447	1.205					0.995	0.775
			0.899	0.814					1.06	1.665					1.228	2.935
			0.803	1.449					0.911	2.481					1.645	1.982
			0.933	1.318					0.934	1.493					0.798	0.502
			0.738	1.32					1	1.51					1.257	0.686
			1.179	0.694					0.98	0.825					1.219	0.56
			1.241	0.735					1.979	1.394					0.977	0.408
			0.977	0.816					1.106	0.877					1.078	0.573
			0.743	0.907					1.047	0.604					0.805	0.81
			1.256	0.724					0.686	1.4					1.101	0.518
			0.658	0.708					1.039	1.16					1.315	0.552
			1.055	1.517					1.697	1.206					0.639	0.632
			1.581	1.487					1.62	1.293					0.939	0.651
			2.451	2.045					1.665	1.75					1.146	0.811
			2.348	2.279					1.79	1.484					1.021	0.759
			2.691	1.312					1.442	2.808					0.896	0.758
			1.109	2.512					2.843	0.754					2.26	0.89
			3.623	2.526					1.783	0.884					0.666	0.658
			0.764	1.353					0.864	1.027					1.007	0.735
			1.122	1.461					1.419	0.986					0.847	0.726
			0.626	2.25					1.001	0.574					1.188	0.64
			0.732	2.165					1.988	0.712					0.9	0.795
			0.623	1.583					0.617	1.13					0.953	1.003
			0.9	1.149					1.205	1.031					0.682	0.983
			1.238	2.171					2.042	1.947					1.854	0.846
			1.23	2.06					1.247	2.494					1.248	0.849
			0.827	1.518					1.271	1.334					1.9	0.706
			1.118	1.209					1.447	1.975					1.066	0.723
			0.83	0.784					1.095	2.197					0.833	3.49
			1.023	0.984					1.255	0.734					0.975	1.096
			0.653	0.879					0.745	1.215					0.627	0.805
			0.712	0.627					0.699	0.883					1.403	0.654
			0.601	0.956					1.856	1.852					0.618	0.592
			1.269	0.552					1.419	1.991					1.525	1.015
			0.616	1.556					2.65	1.699					0.928	0.669
			0.552	2.167					1.821	1.144					1.285	0.694
			0.772	0.853					1.241	1.498					0.813	1.637
			1.052	1.355					1.254	1.76					0.649	1.813
			0.687	2.566					0.945	0.957					0.679	0.635
			0.733	1.478					2.957	1.265					1.097	1.694
			1.009	1.85					1.095	0.733					1.303	1.186
			0.847	1.001					2.076	2.338					0.78	0.684
			0.869	0.953					1.178	0.791					1.246	1.085
			1.103	1.002					1.117	2.58					0.913	1.12
			1.883	1.041					0.721	0.663					0.717	0.699
			1.379	0.743					1.7	0.626					0.692	0.752
			0.779	0.658					2.177	1.143					0.988	0.926
			2.086	0.941					1.074	2.415					0.911	0.636
			0.697	1.457					0.933	0.702					0.899	0.895
			1.341	1.753					1.32	1.413					1.07	0.859
			0.703	0.989					1.148	1.308					1.089	1.13
			1.037	1.03					0.727	2.153					0.611	1.484
			2.722	0.923					1.096	0.959					1.441	0.806
			2.217	2.736					0.74	1.215					0.803	0.899
			1.229	1.089					0.528	0.605					3.117	1.293
			1.504	2.556					1.883	1.062					0.833	1.073
			0.932	1.816					0.672	0.833					0.732	0.938
			1.151	2.093					1.317	2.053					1.063	0.829
			1.235	0.587					1.372	0.936					0.935	1.227
			1.215	1.66					0.772	2.008					0.569	1.037
			1.599	0.822					1.032	1.005					0.98	0.623
			1.009	0.694					1.188	2.545					0.761	0.654
			0.599	1.212					0.986	1.208					1.225	1.006
			1.188	0.687					0.756	1.755					1.838	0.94
			1.29	1.033					1.027	0.993					0.715	0.838
			0.911	0.801					1.179	0.863					0.823	0.968
			1.164	0.565					1.729	0.675					0.866	0.793
			2.389	0.778					1.149	0.804					0.983	1.185
			1.064	0.791					1.173	1.489					1.063	0.801
			0.96	0.708					0.891	1.258					1.372	0.409
			0.81	0.78					1.245	0.823					0.894	0.707
			0.693	0.698					0.736	2.967					1.313	0.705
			0.683	0.649					1.537	0.899					0.756	0.501
			0.631	0.908					2.084	0.638					1.254	0.45
			0.724	0.715					0.888	1.009					1.436	0.824
			0.83	0.678					1.255	0.856					1.584	0.667
			0.781	0.668					2.767	0.457					0.933	0.944
			0.683	0.746					1.208	1.305					0.743	0.406
			1.073	0.993					2.634	1.564					0.893	0.635
			0.712	0.885					1.486	0.714					1.188	0.589
			0.872	0.858					0.691	1.76					0.864	0.502
			1.151	3.324					1.431	1.162					1.114	0.717
			1.502	1.1					1.492	1.252					0.774	0.609
			0.964	1.653					1.765	0.774					0.818	0.961
			0.62	1.447					1.35	1.528					1.075	0.91
			0.747	1.588					1.921	0.818					0.787	0.668
			1.17	2.229					0.961	1.422					1.763	0.807
			0.601	3.186					1.56	1.035					1.103	0.688
			0.73	1.258					1.454	0.991					1.159	0.969
			0.932	1.073					2.716	1.506					1.69	0.935
			0.625	1.336					1.574	0.907					1.475	1.049
			0.658	0.896					1.418	0.733					0.833	1.023
			0.768	1.418					1.035	0.875					0.604	1.439
			1.077	0.531					0.997	1.659					0.956	1.187
			2.332	1.466					2.302	1.02					1.053	0.686
			1.879	1.481					0.965	0.946					0.556	1.153
			2.825	1.056					1.494	1.661					0.509	1.771
			1.016	0.913					0.866	1.051					0.82	0.526
			1.55	0.626					2.106	1.146					0.665	1.425
			1.797	2.085					1.725	2.103					0.525	0.978
			1.393	1.079					1.855	1.109					0.865	0.586
			2.132	0.952					3.928	0.995					0.41	0.616
			1.685	0.777					0.759	1.739					0.466	0.827
			1.148	0.957					1.686	0.777					0.806	1.64
			1.733	1.5					1.35	0.91					0.864	1.629
			1.785	1.444					0.604	1.257					0.878	1.085
			1.086	2.095					1.238	1.024					0.956	1.27
			0.986	0.992					0.764	1.277					0.958	0.875
			0.772	0.689					0.876	1.472					1.098	1.67
			0.678	0.717					0.683	2.442					0.719	1.312
			0.791	0.814					2.152	1.291					0.668	1.849
			0.635	0.904					0.811	1.235					1.257	0.843
			0.786	1.246					1.285	0.8					1.781	0.769
			0.841	0.887					0.906	1.072					1.937	0.654
			0.896	0.973					0.839	1.327					1.088	1.707
			0.922	0.867					0.619	0.715					1.029	0.525
			0.601	0.9					0.613	0.818					1.249	0.747
			0.997	0.804					1.051	1.712					1.202	1.117
			0.983	2.842					0.7	0.656					0.691	0.769
			1.261	2.67					0.828	1.667					0.91	1.414
			0.607	1.082					1.14	2.156					1.278	1.378
			0.825	1.407					0.507	1.971					1.192	1.298
			0.726	1.423					0.756	1.642					0.856	0.929
			1.492	1.302					0.649	1.087					0.964	1.446
			1.175	1.803					2.693	1.592					1.274	0.765
			0.966	1.398					0.828	0.995					0.772	2.308
			0.946	1.825					1.393	1.535					0.703	0.831
			0.786	0.779					0.926	3.444					0.987	1.098
			0.946	1.052					1.333	1.535					1.869	0.825
			0.677	1.099					0.648	1.323					1.447	1.693
			0.91	1.665					0.632	2.734					0.636	0.843
			0.667	1.959					0.704	1.059					0.886	0.872
			0.832	1.712					0.976	1.357					0.649	0.648
			0.945	1.663					0.791	0.907					1.478	0.868
			0.957	1.183					0.868	1.588					0.6	1.335
			1.583	1.533					2.567	1.569					0.854	1.38
			1.437	2.046					1.086	1.103					1.051	2.109
			3.736	1.038					0.967	1.596					1.15	0.547
			1.482	0.779					0.996	0.97					1.065	1.826
			2.411	0.909					0.633	0.808					1.595	0.571
			0.635	0.601					0.979	2.026					0.933	0.726
			0.416	1.034					0.751	1.657					1.128	0.737
			0.797	1.037					0.837	2.341					1.248	0.541
			2.468	1.281					1.385	2.455					0.978	0.559
			1.728	0.943					2.947	1.13					1.264	0.869
			1.462	0.891					1.51	1.785					0.655	0.498
			2.09	0.861					2.614	2.273					1.194	0.543
			1.626	0.895					0.805	1.343					1.279	0.482
			0.649	0.836					3.012	0.92					1.011	0.651
			2.16	0.831					1.616	0.849					2.113	1.173
			0.573	0.84					0.83	1.87					0.847	1.148
			0.941	1.097					1.53	1.762					0.927	1.186
			1.247	1.302					1.174	1.035					1.368	0.784
			1.099	0.808					0.746	0.724					1.78	1.502
			1.114	1.018					2.434	0.821					1.227	1.212
			1.063	2.667					1.224	1.099					0.992	0.972
			0.66	1.709					0.748	1.007					0.995	0.983
			1.452	0.885					1.157	2.13					0.824	0.782
			1.116	0.838					2.383	1.358					0.726	1.314
			1.101	1.955					0.69	1.726					1.835	1.42
			0.968	1.275					0.792	1.396					0.969	0.733
			0.69	0.695					1.306	0.926					1.595	1.089
			0.941	1.474					0.858	2.082					0.723	1.551
			0.638	1.358					0.988	2.271					1.678	1.611
			0.803	0.766					0.738	1.008					1.282	0.953
			0.909	0.947					1.381	0.727					0.959	1.011
			0.712	1.251					2.175	1.955					1.135	0.911
			0.677	1.402					1.144	1.2					1.268	0.834
			0.849	0.711					1.408	1.8					1.284	0.934
			0.933	0.72					1.03	0.798					1.805	0.75
			0.675	2.927					1.054	1.451					0.539	1.368
			0.723	2.872					0.742	2.444					1.063	0.72
			0.738	2.631					0.789	0.569					0.791	0.711
			0.825	0.728					0.498	0.612					1.589	0.788
			0.813	1.089					0.637	1.187					1.453	0.755
			0.6	2.134					0.853	1.497					2.052	1.132
			1.318	1.586					1.046	0.876					0.917	1.379
			1.081	0.601					0.658	1.991					0.816	1.001
			0.61	1.076					0.827	1.472					0.912	1.228
			0.933	1.895					1.071	0.871					0.624	1.05
			0.772	1.212					1.389	0.877					1.055	1.071
			0.739	1.262					0.644	1.531					1.151	1.199
			0.983	1.627					1.379	1.144					0.672	1.41
			0.621	1.003					0.799	0.591					1.006	1.355
			0.972	2.631					0.965	4.502					0.641	1.144
			2.92	2.75					2.232	1.516					1.901	0.895
			4.306	0.724					1.549	1.197					1.088	1.396
			1.905	1.678					1.237	2.005					0.883	1.162
			2.088	1.276					1.31	2.116					1.202	0.815
			1.12	1.886					1.312	1.112					1.04	1.545
			0.969	2.128					1.066	2.058					1.106	1.386
			0.813	0.883					0.933	1.625					2.417	0.928
			0.644	1.822					1.142	1.324					0.671	0.639
			0.841	1.181					1.624	1.532					1.384	1.177
			0.684	1.331					1.533	1.993					1.276	0.959
			0.71	1.841					1.322	1.692					1.171	0.848
			1.346	0.645					0.701	1.414					1.403	0.79
			0.656	0.665					0.56	1.21					0.746	0.827
			0.794	1.059					1.263	3.978					1.141	0.89
			0.711	1.436					1.031	0.834					0.781	1.11
			2.026	1.581					0.612	1.507					1.02	1.202
			1.119	1.155					0.944	1.291					1.313	1.601
			0.891	0.843					1.694	0.98					1.159	1.816
			1.192	1.559					1.148	1.393					1.019	0.826
			0.856	0.841					0.804	1.662					0.916	3.503
			0.744	1.211					1.063	1.482					1.072	0.651
			0.573	2.227					0.775	0.999					2.647	0.835
			0.587	1.742					0.633	1.322					0.638	0.772
			2.102	1.089					0.505	2.194					0.976	1.674
			0.573	0.61					1.38	0.861					0.77	1.222
			1.255	1.159					1.858	1.534					1.497	1.327
			0.887	1.015					1.201	1.673					1.891	1.23
			0.981	1.015					0.877	2.122					0.904	0.656
			0.651	1.327					0.781	1.464					0.79	2.134
			0.752	0.959					1.475	1.696					0.843	0.999
			1.125	2.733					1.651	1.131					0.76	1.325
			0.674	0.561					0.8	2.726					1.197	1.252
			2.359	0.913					0.791	0.598					1.818	1.495
			1.486	0.778					1.069	1.337					1.003	0.766
			1.829	1.05					1.152	4.482					0.931	0.814
			2.557	0.988					0.74	0.841					1.394	0.875
			1.722	0.947					1.401	1.177					1.037	0.933
			1.674	1.615					0.574	0.641					1.27	1.814
			0.638	1.176					0.85	1.673					1.067	1.434
			1.568	0.896					0.677	2.11					1.118	1.071
			1.312	1.855					1.269	0.791					1.194	0.678
			0.791	1.292					1.352	2.303					0.677	2.741
			1.824	1.483					1.095	1.303					1.089	0.747
			0.595	1.488					1.975	2.799					1.042	0.757
			0.999	0.539					0.865	1.934					0.957	0.847
			0.997	1.123					1.073	1.44					0.773	0.631
			0.855	2.007					1.233	0.765					0.69	1.576
			1.029	3.183					0.776	1.257					0.547	1.447
			0.876	4.245					0.917	1.823					1.833	1.436
			0.943	2.754					1.088	1.155					0.648	1.244
			1.102	1.348					1.29	1.758					0.524	0.705
			0.87	1.792					0.921	0.928					1.179	0.765
			0.755	0.556					1.077	0.898					1.429	0.601
			0.63	2.758					1.28	0.843					1.912	0.721
			1.095	0.741					0.966	1.297					1.254	1.822
			0.777	1.99					0.564	1.238					0.591	1.262
			0.642	3.58					0.71	3.662					0.773	0.975
			0.823	1.063					0.786	1.425					1.333	0.534
			0.746	0.846					0.971	1.304					1.196	1.828
			1.018	1.244					1.529	5.035					1.494	0.921
			1.306	0.89					1.009	1.068					1.35	0.796
			0.88	0.697					1.471	1					0.83	1.057
			1.004	0.937					1.239	3.555					0.622	1.052
			1.237	1.038					0.907	0.833					0.944	1.364
			1.231	0.899					1.478	1.932					0.988	1.259
			1.069	0.932					2.228	1.663					0.711	1.098
			1.292	1.482					0.981	2.102					0.942	0.865
			3.133	1.109					1.056	1.242					1.152	0.833
			2.242	1.91					1.22	3.409					1.03	1.232
			1.902	0.936					1.385	1.743					1.318	0.823
			0.482	1.067					0.942	1.397					0.747	1.487
			0.571	1.185					1.041	1.086					0.893	1.951
			0.535	1.6					1.138	1.064					1.603	0.881
			1.096	0.732					1.096	1.735					0.978	1.608
			1.272	0.825					1.377	1.728					0.94	0.959
			3.202	0.627					1.408	1.611					1.412	2.074
			1.194	1.004					0.886	0.883					0.776	0.947
			1.306	0.633					0.823	1.266					0.932	0.765
			1.016	0.783					1.349	1.347					1.217	0.937
			0.538	1.118					1.263	2.052					0.887	1.135
			0.881	2.415					1.48	1.313					0.632	0.707
			0.91	1.569					1.106	1.948					0.963	0.721
			0.876	1.116					0.857	1.052					0.807	0.625
			1.012	1.203					1.185	1.512					0.815	1.855
			1.169	0.986					1.083	1.45					1.123	0.702
			0.714	1.946					1.495	1.256					0.634	0.888
			1.057	1.394					1.498	2.105					1.055	0.772
			1.852	1.021					1.104	1.023					0.859	1.375
			1.015	1.052					1.497	1.604					0.823	0.908
			0.895	1.605					1.267	1.322					1.596	1.683
			1.054	0.906					1.161	1.082					0.69	0.871
			1.308	1.598					1.265	4.584					0.846	1.472
			0.957	0.843					3.676	1.277					2.283	1.046
			0.467	0.852					1.217	0.896					1.172	1.719
			1.549	2.309					1.044	1.385					0.971	0.897
			0.615	0.704					1.107	1.88					0.7	1.499
			1.566	0.625					2.499	1.258					1.609	0.743
			1.706	2.304					1.571	1.316					0.61	0.997
			0.799	0.928					0.945	1.231					0.85	1.073
			1.147	1.312					1.641	2.203					1.424	0.81
			0.999	0.793					1.05	0.978					0.811	0.814
			1.624	1.442					0.631	1.298					1.086	1.66
			0.744	0.889					1.659	0.804					1.42	0.676
			0.743	1.238					0.979	0.908					0.56	1.225
			1.077	1.071					1.527	2.686					0.77	1.818
			1.089	0.813					1.3	2.291					2.081	0.651
			0.98	1.292					1.682	0.967					0.976	0.966
			1.035	1.425					1.113	1.309					0.747	1.825
			0.721	0.832					0.969	1.278					1.391	1.127
			0.729	0.626					1.388	0.926					0.545	0.928
			1.217	0.998					1.86	0.645					1.456	1.272
			0.9	0.94					1.327	1.101					0.799	1.948
			0.764	0.91					0.959	1.406					0.705	1.137
			1.048	0.894					1.522	0.957					0.849	1.243
			0.702	0.881					1.241	1.483					0.925	0.868
			1.22	0.963					1.166	0.684					0.935	0.928
			1.316	0.775					1.293	1.427					1.412	0.642
			0.844	1.802					0.774	1.022					0.968	1.275
			0.904	1.886					0.882	0.997					1.662	1.206
			0.839	2.043					1.165	1.718					1.342	1.258
			1.085	1.845					0.657	1.081					1.747	1.737
			0.815	0.94					0.971	1.829					0.814	1.38
			0.618	0.775					0.93	2.171					0.581	0.664
			1.047	1.075					0.608	1.04					0.63	0.626
			1.831	1.443					1.298	1.473					1.194	0.441
			1.045	0.823					1.245	1.907					0.831	3.602
			0.48	2.288					0.599	1.335					1.403	0.571
			1.111	0.685					0.855	0.902					0.678	2.97
			2.273	0.995					1.532	0.93					1.225	0.559
			1.524	1.182					1.291	1.415					0.879	0.494
			3.713	0.917					1.789	0.94					0.821	2.251
			0.946	0.937					0.74	1.289					2.239	0.764
			2.649	1.025					0.733	1.737					0.913	0.87
			2.41	0.556					3.944	1.643					0.98	1.885
			1.421	0.487					1.06	1.752					0.79	0.746
			1.287	0.404					0.888	1.482					1.095	1.34
			2.188	0.354					1.051	1.273					0.826	1.939
			1.762	0.459					0.726	1.168					1.047	1.242
			0.575	0.901					0.596	1.058					0.78	2.467
			1.671	0.39					1.322	3.443					0.861	0.989
			1.325	1.391					2.602	1.697					1.844	1.487
			1.974	1.097					1.114	1.624					1.366	2.224
			1.04	0.582					0.676	1.156					0.965	1.007
			1.057	0.503					0.714	0.717					0.904	0.958
			0.912	0.518					0.828	0.763					0.715	0.79
			0.618	0.648					0.728	1.198					1.282	1.066
			0.967	0.49					0.555	0.779					0.754	1.032
			0.909	0.536					1.245	1.857					0.734	0.831
			1.704	1.253					0.922	1.431					0.617	1.007
			0.8	1.467					0.658	2.07					0.665	1.186
			2.119	0.845					0.802	1.965					1.14	0.578
			0.705	1.277					1.131	1.46					0.723	1.26
			1.016	0.776					1.678	2.225					0.624	1.768
			0.894	0.969					1.3	1.985					2.083	0.738
			0.788	0.92					1.416	2.592					1.851	1.192
			0.629	1.081					0.768	0.988					1.156	0.583
			1.369	0.793					0.765	1.416					2.246	1.74
			1.375	0.931					0.789	1.224					0.569	1.111
			0.81	2.122					1.554	4.218					0.876	0.835
			0.949	1.183					1.397	1.045					0.976	2.227
			0.83	1.906					0.612	1.311					0.75	0.876
			2.774	0.798					1.154	1.728					0.874	0.928
			2.774	0.787					1.091	1.088					0.758	1.994
			3.079	0.708					1.571	1.213					2.356	0.682
			2.663	0.935					0.748	1.317					0.521	0.735
			1.544	1.772					1.061	2.497					0.698	1.087
			3.858	1.041					1.119	1.867					0.521	0.725
			3.607	1.072					0.908	2.638					0.766	1.147
			1.56	0.723					1.16	1.23					1.769	0.824
			2.042	0.643					0.628	2.699					1.672	1.094
			1.971	1					2.062	3.203					1.052	1.163
			1.092	0.979					0.995	0.461					0.708	0.664
			1.664	1.102					0.653	1.716					1.187	1.379
			0.668	0.905					1.061	1.714					1.51	0.969
			0.869	0.751					0.679	1.634					1.323	0.746
			1.078	1.221					1.874	1.076					1.335	1.808
			0.568	0.826					0.78	1.423					0.802	0.821
			0.582	0.948					0.811	2.113					0.834	1.88
			0.755	0.968					0.753	0.798					1.203	0.665
			1.643	0.948					0.97	0.83					1.7	0.666
			0.715	1.789					2.568	2.051					1.334	1.673
			1.18	1.015					1.627	1.542					1.029	1.054
			1.018	1.233					2.752	1.003					0.569	2.005
			1.208	0.67					1.296	0.667					0.74	0.603
			1.266	1.02					1.39	1.073					0.77	0.693
			1.374	0.806					1.342	2.675					0.89	0.79
			0.775	0.711					1.631	1.313					0.895	1.213
			0.712	1.027					0.797	1.329					0.748	1.329
			0.975	1.499					2.461	1.251					1.004	1.186
			1.272	1.567					1.1	1.006					1.022	0.972
			0.929	0.807					1.018	2.001					1.402	1.205
			1.006	1.371					1.122	0.922					0.571	0.624
			0.955	0.836					1.094	2.567					0.89	1.872
			0.724	1.767					0.691	1.052					0.879	0.917
			0.594	0.902					1.765	0.739					1.528	0.743
			0.712	0.876					0.803	0.877					1.739	2.451
			1.561	0.784					1.399	1.044					1.471	1.718
			0.639	1.975					0.89	0.737					1.441	0.762
			1.054	0.97					2.101	0.825					0.824	1.134
			0.752	1.029					1.225	1.635					1.844	0.556
			0.728	1.285					2.504	2.454					1.295	0.783
			0.809	0.806					1.109	3.082					1.118	1.058
			0.96	1.288					1.166	1.766					1.346	1.304
			2.499	0.778					0.595	1.942					0.975	2.016
			2.07	0.768					1.064	1.01					0.62	0.654
			1.939	0.891					0.975	1.881					0.867	0.682
			1.164	0.852					1.341	0.763					0.753	0.58
			1.357	1.264					1.195	0.905					0.874	0.895
			1.268	2.441					1.598	2.992					0.554	1.21
			1.806	1.942					0.997	0.652					0.611	3.283
			1.976	1.012					0.858	2.166					1.376	0.424
			1.359	1.048					1.632	1.444					1.307	0.712
			1.118	0.789					0.702	3.013					0.62	0.561
			1.171	0.574					0.992	1.974					0.568	0.715
			2.244	0.742					0.663	1.235					0.946	0.524
			2.412	0.555					1.426	3.288					1.117	0.305
			1.57	1.749					0.791	1.278					0.705	0.964
			1.695	1.191					1.29	1.748					0.578	0.533
			2.276	2.214					0.836	1.272					0.943	0.671
			1.157	0.708					1.678	1.511					0.901	0.535
			2.031	0.516					0.508	1.272					0.599	1.821
			1.821	0.7					0.94	0.88					0.936	1.28
			2.079	0.475					0.766	0.995					1.615	0.996
			0.777	0.456					2.935	0.841					1.128	0.752
			2.145	0.593					1.02	1.636					0.838	0.846
			1.919	0.905					0.921	1.522					1.001	0.942
			1.308	2.37					1.293	1.015					0.906	0.913
			1.369	1.06					0.975	1.638					0.706	0.77
			0.751	0.914					1.593	0.654					0.939	1.123
			1.025	1.089					2.086	1.466					0.829	1.064
			0.608	1.423					0.761	1.948					1.275	1.022
			1.134	0.996					0.812	1.609					1.023	1.417
			1.061	0.846					4.034	1.144					0.85	0.993
			0.6	1.341					0.77	1.228					0.624	0.923
			1.439	2.478					2.004	1.788					0.664	2.798
			0.644	1.79					1.144	0.928					0.891	1.002
			0.658	1.517					0.699	3.162					0.562	1.457
			0.672	0.55					0.653	1.559					1.241	0.848
			0.6	0.532					1.919	1.094					1.501	0.782
			1.703	0.755					1.356	1.265					1.346	0.768
			0.859	1.744					1.09	2.856					1.418	1.353
			0.821	1.039					0.704	1.272					0.957	0.645
			1.053	0.594					1.151	0.971					0.939	0.78
			0.871	0.835					2.037	4.071					0.931	0.687
			0.757	1.051					1.294	5.262					0.974	1.982
			0.807	1.355					0.859	1.509					0.68	0.752
			0.775	1.015					0.942	3.187					0.986	0.855
			0.658	1.571					1.576	0.861					1.196	0.982
			0.784	1.264					1.411	1.309					1.302	0.831
			0.86	1.086					0.871	0.777					1.8	1.018
			0.847	1.008					4.884	3.391					1.522	1.004
			1.071	0.732					1.859	1.649					1.175	0.839
			0.898	1.1					2.388	1.081					0.931	1.221
			1.902	1.424					1.974	0.859					1.292	1.259
			1.331	0.668					1.561	2.798					2.53	2.96
			1.748	1.295					2.901	1.077					2.132	0.597
			2.722	1.377					0.557	2.476					1.253	0.553
			1.492	1.554					0.638	1.356					0.774	1.672
			1.277	0.583					1.776	1.043					0.948	1.174
			1.497	0.764					0.696	1.723					1.151	1.57
			1.53	1.018					0.597	1.771					1.238	0.99
			0.732	0.635					1.432	1.999					1.061	1.032
			1.723	2.582					1.051	2.136					0.618	0.802
			1.411	1.021					1.684	2.147					1.279	0.578
			0.509	0.599					1.203	1.949					1.012	1.051
			3.148	1.479					1.161	2.946					1.095	1.898
			2.007	1.212					1.6	1.078					0.996	1.104
			1.145	0.452					1.73	1.503					0.94	0.787
			1.483	0.66					1.527	0.819					0.874	1.802
			1.292	0.452					0.616	0.834					0.859	0.763
			1.068	0.462					1.151	1.974					1.672	1.373
			1.16	0.772					1.614	1.424					1.653	0.611
			0.436	2.202					1.33	1.349					1.493	1.713
			1.731	2.223					1.37	0.824					0.585	1.355
			0.965	2.555					1.218	1.556					0.447	0.733
			0.764	1.045					1.042	1.302					0.512	0.727
			0.825	3.154					0.575	3.188					0.66	0.671
			0.966	1.625					1.942	1.909					0.5	1.147
			0.561	0.83					1.446	1.009					0.693	2.132
			0.891	1.063					1.053	1.38					2.213	1.629
			0.642	1.659					0.825	0.836					0.529	0.816
			0.733	0.955					2.134	0.778					1.032	1.654
			2.173	1.094					1.09	0.999					0.8	0.875
			1.129	1.247					0.998	0.833					0.943	1.277
			0.817	0.828					1.53	1.308					0.928	1.093
			0.954	1.248					1.226	1.484					0.867	1.121
			0.938	0.977					1.647	0.966					2.246	1.023
			1.341	1.1					0.72	1.347					0.986	0.799
			1.1	0.941					0.672	2.62					1.324	0.744
			0.655	1					1.053	0.871					1.712	0.63
			0.911	0.587					0.642	0.778					0.756	1.032
			0.792	1.786					3.075	1.035					1.136	4.454
			1.093	1.322					0.659	0.836					2.138	0.774
			1.03	0.856					1.756	4.42					1.161	1.426
			1.257	0.608					3.024	2.121					0.986	0.813
			1.741	0.977					0.704	4.126					0.681	1.373
			0.961	0.942					0.506	0.869					1.405	2.149
			1.16	1.338					3.063	3.2					0.679	0.947
			4.899	1.783					4.077	1.598					1.284	0.933
			1.779	0.925					1.756	1.137					2.028	0.752
			1.545	1.096					1.426	1.32					1.18	1.082
			1.906	1.116					0.738	1.502					1.45	1.131
			1.415	1.017					0.885	1.326					1.576	1.411
			1.313	0.913					2.415	4.17					1.722	0.946
			2.551	0.886					0.919	1.69					1.582	1.034
			2.922	1.92					0.883	0.672					0.669	0.886
			1.66	0.683					1.677	1.428					1.967	0.796
			1.385	1.812					1.138	1.455					1.451	0.635
			1.79	1.332					1.036	2.864					1.273	0.643
			1.151	0.863					1.409	2.713					0.744	0.87
			2.867	1.828					0.879	2.165					0.726	0.812
			1.403	1.125					1.838	1.157					0.769	0.466
			2.134	0.78					1.269	2.599					0.729	0.464
			2.039	0.734					1.008	0.839					0.938	0.717
			1.898	0.804					1.244	2.527					1.282	0.451
			0.491	1.258					1.27	1.715					1.682	0.614
			0.93	0.907					0.939	1.983					0.779	0.902
			0.57	1.273					2.254	1.19					0.856	2.314
			1.184	1.968					0.688	1.676					1.266	1.791
			0.793	0.854					0.856	1.064					0.786	0.578
			1.078	1.095					1.933	1.121					1.514	0.683
			1.365	0.871					0.867	1.78					0.591	0.417
			0.945	0.752					0.972	0.684					1.253	0.392
			1.323	1.563					0.92	1.123					0.693	0.38
			1.193	0.545					1.118	1.247					1.561	0.564
			0.854	1.363					0.833	2.695					1.658	1.35
			1.357	1.115					0.856	0.996					1.19	1.735
			0.827	1.76					0.98	1.802					0.994	0.596
			1.294	0.951					1.113	1.065					1.771	0.876
			1.268	1.284					0.691	0.91					1.495	0.698
			1.071	0.965					0.533	1.273					1.741	1.188
			0.748	0.752					1.686	1.233					0.639	1.093
			0.744	1.274					1.296	1.072					1.486	0.888
			2.068	0.907					3.926	1.289					0.922	0.913
			3.833	0.602					1.509	1.261					0.61	0.513
			2.584	1.119					0.65	3.376					0.86	0.831
			1.019	1.099					1.578	1.773					1.137	0.784
			1.408	0.985					1.299	0.791					1.214	0.744
			1.045	0.857					0.982	1.732					0.907	1.701
			1.077	1.236					0.87	3.1					1.849	2.371
			1.681	1.036					0.99	2.547					0.608	1.336
			1.442	0.814					1.788	0.915					0.676	0.732
			1.591	0.913					1.8	1.644					0.962	0.535
			1.807	1.311					1.861	2.333					0.539	1.161
			1.199	1.491					1.519	1.46					0.676	1.414
			1.321	0.766					1.959	0.686					0.638	1.793
			1.585	1.489					1.927	2.142					0.843	0.573
			0.926	0.986					1.097	2.097					0.649	0.822
			1.059	0.837					0.705	1.294					0.543	0.669
			2.74	2.667					0.728	1.851					0.52	1.948
			0.941	4.401					0.779	1.132					0.689	0.703
			0.921	1.981					1.116	0.984					0.758	0.72
[truncated: 2,472 more rows]
