# Supplementary material for: Progressive axonopathy when oligodendrocytes lack the myelin protein CMTM5
Source: eLife. 2022 Mar 11;11:e75523. doi: 10.7554/eLife.75523 (PMC8916772; doi:10.7554/eLife.75523)
Supplement: Figure 3—figure supplement 2—source data 1. [file elife-75523-fig3-figsupp2-data1.xlsx]

## Sheet: Sheet1
Fig 3 S2 A			Fig 3 S2 B
myo-Inositol			NAA
CTRL	cKO		CTRL	cKO
3.7	5.556		10.433	8.963
3.251	4.979		8.863	8.904
3.042	4.628		9.94	8.992
2.859	5.176		9.806	9.079
