# Supplementary material for: Progressive axonopathy when oligodendrocytes lack the myelin protein CMTM5
Source: eLife. 2022 Mar 11;11:e75523. doi: 10.7554/eLife.75523 (PMC8916772; doi:10.7554/eLife.75523)
Supplement: Figure 3—figure supplement 3—source data 1. [file elife-75523-fig3-figsupp3-data1.xlsx]

## Sheet: Sheet1
Fig 3 S3 A			Fig 3 S3 B			Fig 3 S3 C			Fig 3 S3 D
APP P30			MAC3 P30			IBA1 P30			GFAP P30
CTRL	cKO		CTRL	cKO		CTRL	cKO		CTRL	cKO
5	0		0.213613	0.201516		2.02699	2.53789		2.77763	2.55245
6	8		0.143483	0.337135		3.53154	2.16833		7.18696	5.10801
0	0		0.195481	0.342226		3.37186	3.31366		3.18449	5.0091
0	10		0.475245	0.212043		2.5279	2.97329		4.59234	4.36696
0	6		0.206699	0.029133		1.31411	2.04254		5.53368	5.9085
Fig 3 S3 E			Fig 3 S3 F			Fig 3 S3 G			Fig 3 S3 H
APP P75			MAC3 P75			IBA1 P75			GFAP P75
CTRL	cKO		CTRL	cKO		CTRL	cKO		CTRL	cKO
30.0938	22.8557		0.029909	0.130466		1.557	0.862097		15.1813	17.5898
20.6904	25.6839		0.022379	0.433563		2.42837	1.02648		5.10379	10.4917
27.1434	50.8867		0.0355297	0.205838		0.181431	1.20404		12.3134	8.6396
15.6252	14.7308		0.0109809	0.178429					11.1447	2.41991
5.57014	16.6539		0.0406557						2.95286	5.43124
Fig 3 S3 I			Fig 3 S3 J			Fig 3 S3 K			Fig 3 S3 L
APP P365			MAC3 P365			IBA1 P365			GFAP P365
CTRL	cKO		CTRL	cKO		CTRL	cKO		CTRL	cKO
11.4536	83.1225		0.00290176	0.0168019		2.68408	11.5704		6.01184	26.3797
12.5482	33.1841		0.0264893	0.0634485		2.04208	12.97		9.09177	26.0851
34.5925	35.9358		0.0130824	0.203013		2.19064	11.546		8.76002	28.6793
0	46.5133		0.0133104	0.0775132		3.22054	13.4411		5.52611	23.516
0	37.5079		0.00882741	0.227332		2.16846	11.4894		9.78605	22.1238
	59.641			0.126786			15.6414			20.5648
