# Supplementary material for: Progressive axonopathy when oligodendrocytes lack the myelin protein CMTM5
Source: eLife. 2022 Mar 11;11:e75523. doi: 10.7554/eLife.75523 (PMC8916772; doi:10.7554/eLife.75523)
Supplement: Figure 3—source data 1. [file elife-75523-fig3-data1.xlsx]

## Sheet: Sheet1
Fig 3 B
P30		P75		P365
Cmtm5fl/fl(n=4)	Cmtm5 cKO (n=4)	Cmtm5fl/fl(n=5)	Cmtm5 cKO (n=5)	Cmtm5fl/fl(n=5)	Cmtm5 cKO (n=5)
0.8	2.2	0.8	10.5611	2.4	10.9
0.4	1.8	1.0121	5.4235	0.4	8.4
0.3	2.4	2.409	5.3132	4	13.3
0.8	1.5	2.2097	3.5857	2.5	12.9
		2.381	5.4284	4.2	10.9
Fig 3 C
P30		P75		P365
CTRL	cKO	CTRL	cKO	CTRL	cKO
1052.6	827	1141.6	662	615.4	256.2
936.333	505.5	569	769.2	726.4	393.4
830.25	870	580.2	951.2	952.2	515.8
713.5	571.75	785.2	379.6	480	307.8
822.25		810.8		778.2	734.8
Fig 3 E			Fig 3 F
CTRL (n=3)	Cmtm5 cKO (n=7)		CTRL (n=3)	Cmtm5 cKO (n=7)
1.9802	8.46246		134	208.7
0.759144	13.2883		149.2	123
0.560748	12.6801		277.3	86.1
	13.9905			129.3
	7.53968			199.7
	6.98577			169
	12.3007			113.6
