# Supplementary material for: Progressive axonopathy when oligodendrocytes lack the myelin protein CMTM5
Source: eLife. 2022 Mar 11;11:e75523. doi: 10.7554/eLife.75523 (PMC8916772; doi:10.7554/eLife.75523)
Supplement: Figure 4—source data 1. [file elife-75523-fig4-data1.xlsx]

## Sheet: Sheet1
Fig 4 A´´			Fig 4 B´´			Fig 4 C´´			Fig 4 D´´
Myelin Outfoldings			Inner-Tongue inclusions			Axoplasmic inclusions			Myelin whorls
CTRL (n=3)	Cmtm5 cKO (n=3)		CTRL (n=3)	Cmtm5 cKO (n=3)		CTRL (n=3)	Cmtm5 cKO (n=3)		CTRL (n=3)	Cmtm5 cKO (n=3)
21.9298	35.8905		20.4678	11.9635		8.77193	27.5161		10.2339	94.5117
28.0241	31.4504		8.75753	6.62115		14.012	8.27643		33.2786	110.904
21.1741	23.6616		12.7045	6.30977		11.8575	34.7037		21.1741	129.35
