# Supplementary material for: Progressive axonopathy when oligodendrocytes lack the myelin protein CMTM5
Source: eLife. 2022 Mar 11;11:e75523. doi: 10.7554/eLife.75523 (PMC8916772; doi:10.7554/eLife.75523)
Supplement: Figure 5—source data 1. [file elife-75523-fig5-data1.xlsx]

## Sheet: Sheet1
Figure 5 ERG Data A-D																																		Figure 5 VEP Data E-H
This dataset describes ERG a- (left) and b-(right) wave amplitudes and latencies measured in CMTM5 mutant and WT mice																																		This dataset describes VEP amplitudes and latencies measured in CMTM5 mutant and WT mice
original *.arf data files recorded in BioSig Software in Inner Ear Lab Archive, March/April 2021																																		original *.arf data files recorded in BioSig Software in Inner Ear Lab Archive, March/April 2021
analysed using ERGAnalyse_V2_CMTM5.m																																		analysed using ERGAnalyse_VEP_CMTM5.m
metadata and analysis scripts and Igor/Illustrator files for publication in W:\public\Data\CMTM5_VEP\final analysis																																		metadata and analysis scripts and Igor/Illustrator files for publication in W:\public\Data\CMTM5_VEP\final analysis
Nicola Strenzke, 30.09.2021, Nicola.Strenzke@med.uni-goettingen.de																																		Nicola Strenzke, 30.09.2021, Nicola.Strenzke@med.uni-goettingen.de
	latencies Mutant
	a-wave													mean	SEM		b-wave													mean	SEM
	No		1524	1525	1543	1497	1496	1498	1534	1539	1547	1569	1495				No		1524	1525	1543	1497	1496	1498	1534	1539	1547	1569	1495						Latencies KO													mean	SEM
	exp.date		2021-03-19	2021-03-19	2021-03-26	2021-04-02	2021-04-02	2021-04-16	2021-04-23	2021-04-23	2021-04-23	2021-04-23	2021-04-30				exp.date		2021-03-19	2021-03-19	2021-03-26	2021-04-02	2021-04-02	2021-04-16	2021-04-23	2021-04-23	2021-04-23	2021-04-23	2021-04-30						No		1524	1525	1543	1497	1496	1498	1534	1539	1547	1569	1495
	DOB		2020-08-13	2020-08-13	2020-08-10	2020-08-15	2020-08-15	2020-08-15	2020-08-16	2020-08-10	2020-08-14	2020-08-11	2020-08-15				DOB		2020-08-13	2020-08-13	2020-08-10	2020-08-15	2020-08-15	2020-08-15	2020-08-16	2020-08-10	2020-08-14	2020-08-11	2020-08-15						exp.date		2021-03-19	2021-03-19	2021-03-26	2021-04-02	2021-04-02	2021-04-16	2021-04-23	2021-04-23	2021-04-23	2021-04-23	2021-04-30
	age (d)		216	216	226	227	227	241	247	253	249	252	255	237.182			age (d)		216	216	226	227	227	241	247	253	249	252	255	237.182					DOB		2020-08-13	2020-08-13	2020-08-10	2020-08-15	2020-08-15	2020-08-15	2020-08-16	2020-08-10	2020-08-14	2020-08-11	2020-08-15
	Attenuator	cds/m²															Attenuator	cds/m²																	age (d)		216	216	226	227	227	241	247	253	249	252	255	237.182
	30	0.0001															30	0.0001							130.048					130.048					Attenuator	cds/m²										filesave error
	29	0.0008							0.04096					0.04096			29	0.0008	90.8493			89.2928	89.9072	91.5046	109.937	93.5936		76.841	89.2109	91.392	3.19642				30	0.0001	120.586	200.049	68.3213			128.819						129.444	27.0799
	28	0.0029															28	0.0029	82.7802		83.7632	99.0822	82.0429	81.7562	85.7702	83.1078	83.2307	67.2154	74.8749	82.3624	2.53986				29	0.0008	112.067	85.033	114.36	71.3933	99.7786	90.3987						95.5051	6.74582
	25	0.0115					26.8698		21.3811					24.1254	2.74432		25	0.0115	67.584		66.7648	77.824	81.879	76.9229	73.1136	70.5741	71.8029	57.0163	63.5699	70.7052	2.32087				28	0.0029	70.8608	164.045	87.6134	54.0672	66.8058	55.9923		44.5645	82.3706		103.711	81.1145	12.0418
	21	0.0279								20.7667				20.7667			21	0.0279	55.2141		68.608	66.2323	60.8666	70.0826	60.7846	59.8016	54.8864	48.2099	51.5277	59.6214	2.29591				25	0.0115	85.8112	51.4458	67.9117	49.7664	45.5475	51.8554		41.943	74.4243		86.7533	61.7176	5.77978
	15	0.0661	15.9744				22.6509		12.9024	18.8826		14.1312		16.9083	1.75366		15	0.0661	50.4218		58.1222	53.8624	51.2	58.1632	55.255	56.0333	49.6845	43.6634	45.3018	52.1708	1.59292				21	0.0279	179.569	50.9133	65.6998	60.1702	42.2707	37.8061	46.121	38.4205	65		82.1248	66.8095	13.3032
	0	0.24775	13.6397			16.5478	17.1622	16.7117	15.5648	16.4659	5.85728	12.1651	16.0563	14.4634	1.20456		0	0.24775	46.4486	49.5206	48.7424	53.3299	43.2947	49.6845	50.5446	50.217	46.2438	40.7962	40.3046	47.1934	1.26881				15	0.0661	64.1024	50.7085	62.6278	55.1322	40.8371	93.225	61.6858	39.7722	67.7478		74.0557	60.9894	5.01629
																																			0	0.24775	48.128	43.5405	41.4925	53.0842	37.6422	88.1869	32.1126	38.4614	67.0925		69.7958	51.9537	5.61449
	latencies WT
	a-wave													mean	SEM		b-wave													mean	SEM
	No		1508	1549	1555	1541	1556	1557	1561	1563	1564	1565	1558				No		1508	1549	1555	1541	1556	1557	1561	1563	1564	1565	1558						Latencies WT
	exp.date		2021-03-16	2021-03-19	2021-03-19	2021-03-26	2021-04-02	2021-04-02	2021-04-16	2021-04-16	2021-04-16	2021-04-16	2021-04-30				exp.date		2021-03-16	2021-03-19	2021-03-19	2021-03-26	2021-04-02	2021-04-02	2021-04-16	2021-04-16	2021-04-16	2021-04-16	2021-04-30						wt													mean	SEM
	DOB		2020-08-10	2020-08-14	2020-08-10	2020-08-10	2020-08-10	2020-08-10	2020-08-11	2020-08-11	2020-08-11	2020-08-11	2020-08-11				DOB		2020-08-10	2020-08-14	2020-08-10	2020-08-10	2020-08-10	2020-08-10	2020-08-11	2020-08-11	2020-08-11	2020-08-11	2020-08-11						No		1508	1549	1555	1541	1556	1557	1561	1563	1564	1565	1558
	age (d)		216	215	219	226	232	232	245	245	245	245	259	234.455			age (d)		216	215	219	226	232	232	245	245	245	245	259	234.455					exp.date		2021-03-16	2021-03-19	2021-03-19	2021-03-26	2021-04-02	2021-04-02	2021-04-16	2021-04-16	2021-04-16	2021-04-16	2021-04-30
	Attenuator	cds/m²															Attenuator	cds/m²																	DOB		2020-08-10	2020-08-14	2020-08-10	2020-08-10	2020-08-10	2020-08-10	2020-08-11	2020-08-11	2020-08-11	2020-08-11	2020-08-11
	30	0.0001							44.9741					44.9741			30	0.0001					125.133	130.048	130.048					128.41	1.6384				age (d)		216	215	219	226	232	232	245	245	245	245	259	234.455
	29	0.0008			40.0589									40.0589			29	0.0008			94.8224	118.415	119.562	103.711	91.4227	114.442	87.3267	114.77	84.3776	103.206	4.67688				Attenuator	cds/m²	first experiment technically insufficient, outlier							incomplete dataset, animal died	filesave error
	28	0.0029											13.5578	13.5578			28	0.0029		94.167	75.776	113.582	116.49	91.0541	81.5923	103.752	107.725	100.27	82.2886	96.6697	4.4381				30	0.0001		187.023					69.0176					128.02	59.0029
	25	0.0115						22.4461		30.2285				26.3373	3.8912		25	0.0115		82.6573	59.1462	104.038	106.824	74.793	70.656	86.7123	81.7152	80.7731	70.7789	81.8094	4.66024				29	0.0008		93.6346	107.397		107.192		162.652			102		114.575	12.2761
	21	0.0279							20.521					20.521			21	0.0279		62.9555	48.3328	82.6982	91.9962	61.399	52.5517	68.649	89.2928	65.3312	59.2691	68.2476	4.74092				28	0.0029		92.3238	95.3139	78.2336	83.1078		73.8918			71.68		82.4252	3.95986
	15	0.0661			18.391	23.9206	24.9037		18.1862	25.8458		19.6198		21.8112	1.4134		15	0.0661		56.6886	44.073	69.591	74.5062	56.7706	47.7594	61.1123	59.5968	59.9245	50.4218	58.0444	2.94811				25	0.0115		62.8736	89.7843	62.0954	76.4723	62.8	42.8032			86.3846	64.7168	68.4913	5.37229
	0	0.24775			17.2851	21.2173	22.569	19.497	15.36	22.6509	20.7667	17.1622	14.5408	19.0054	1.01244		0	0.24775		52.5517	41.4925	61.9725	74.8749	51.2819	45.3427	51.9373	72.0896	57.0982	46.4486	55.509	3.52063				21	0.0279		83.2307	65.7408	63.2422	62.9555	52.0192	40.5914			81.6742	84.0499	66.688	5.54623
																																			15	0.0661		42.3936	63.0374	60	62.2182	50.6675	30.8429			75.2845	31.4163	51.9826	5.66596
																																			0	0.24775		38.8301	98.0992	54.5587	64.9626	47.9232	27.8528			70.0416	42.8851	55.6442	7.76348
	amplitudes mutant																b-wave
	a-wave													mean	SEM		ko													mean	SEM				Amplitudes KO
	No		1524	1525	1543	1497	1496	1498	1534	1539	1547	1569	1495				No		1524	1525	1543	1497	1496	1498	1534	1539	1534	1569	1495						No		1524	1525	1543	1497	1496	1498	1534	1539	1534	1569	1495
	exp.date		44274	44274	44281	44288	44288	44302	44309	44309	44309	44309	44316				exp.date		44274	44274	44281	44288	44288	44302	44309	44309	44309	44309	44316						exp.date		44274	44274	44281	44288	44288	44302	44309	44309	44309	44309	44316
	DOB		44056	44056	44053	44058	44058	44058	44059	44053	44057	44054	44058				DOB		44056	44056	44053	44058	44058	44058	44059	44053	44059	44054	44058						DOB		44056	44056	44053	44058	44058	44058	44059	44053	44059	44054	44058
	age (d)		216	216	226	227	227	241	247	253	249	252	255	237.182			age (d)		216	216	226	227	227	241	247	253	247	252	255	237.182					age (d)		216	216	226	227	227	241	247	253	249	252	255	237.182
	Attenuator	cds/m²															Attenuator	cds/m²																	Attenuator	cds/m²										filesave error
	30	0.0001	-1.69302	-9.52963	3.7427	0.214567	10.1063	-5.94097	14.4681	1.20584	0.981834	-1.28262	0.716519	1.18087	2.00846		30	0.0001	8.84105	32.8095	2.3825	13.6741	14.5423	7.75133	6.65718	1.44895	1.58575	19.262	15.5743	11.3208	2.81489				30	0.0001	51.2119	6.56785	50.9805	17.4128	-0.155339	41.3773	43.7234	35.5902	25.8725		5.65307	27.8234	6.163
	29	0.0008	8.02185	39.7022	-0.791055	0.376989	10.8761	1.99518	22.8313	-1.5019	-4.59438	-0.0801561	8.26745	7.73669	3.95224		29	0.0008	76.478	68.777	-2.44314	65.485	25.2582	59.4422	38.8198	105.661	5.34204	53.1822	31.1458	47.9226	9.6675				29	0.0008	77.907	4.74397	90.8526	102.432	101.849	114.366	76.9695	161.681	49.1386		3.96963	78.3909	15.3967
	28	0.0029	6.4807	-12.0252	16.3374	6.89427	0.758852	4.90738	6.85951	-8.7007	1.23861	-7.6481	4.98864	1.82649	2.51663		28	0.0029	204.543	119.511	21.0259	95.0973	59.695	156.264	255.491	208.181	50.4096	189.792	74.5161	130.411	23.2064				28	0.0029	40.1411	6.40284	162.246	82.3285	119.371	63.7871	14.5368	93.0447	67.8805		146.99	79.6729	16.5587
	25	0.0115	9.82461	1.26156	3.28256	-3.30871	4.46583	-4.49313	24.8835	4.16921	3.80367	-2.22284	12.6738	4.94	2.53724		25	0.0115	246.214	187.415	21.2413	143.854	86.17	273.154	396.901	248.735	75.3026	287.414	104.386	188.253	34.0681				25	0.0115	42.5749	5.19305	216.211	88.5809	140.591	111.524	0	193.512	37.0789		155.552	99.0818	24.3774
	21	0.0279	13.0945	35.9381	-1.86973	-2.29706	0.78811	3.61783	17.3967	22.2776	3.74387	15.3975	7.80994	10.5361	3.53607		21	0.0279	246.128	190.884	32.1325	140.243	106.122	318.561	401.062	252.089	77.1729	290.298	112.636	197.03	34.476				21	0.0279	93.4055	4.47993	301.287	121.919	179.998	160.211	90.6827	218.777	30		238.478	143.924	29.6587
	15	0.0661	30.0326	10.7223	13.1575	-4.76464	15.0004	9.42573	23.7629	26.346	8.33374	31.0552	12.9606	16.0029	3.26164		15	0.0661	250.754	195.945	41.5282	108.215	110.172	305.226	364.98	267.808	74.6123	279.444	118.405	192.463	32.3552				15	0.0661	39.7767	40.2581	265.725	95.6673	180.306	277.38	167.807	226.579	125.229		218.504	163.723	27.3426
	0	0.24775	67.3541	52.9646	12.5482	33.5581	38.5553	31.7836	113.073	81.9366	15.6741	74.9063	41.5822	51.2669	9.19271		0	0.24775	274.211	217.204	48.2449	108.302	114.714	318.683	393.826	263.206	83.2095	310.394	134.352	206.032	34.3644				0	0.24775	54.043	56.1495	288.267	124.23	124.621	285.609	189.278	262.152	62.365		275.804	172.252	31.5361
																																					0.0008	0.00029	0.0001	0.0001	0.0001	0	0.0115	0.0008	0.0008		0.0008	0.001529	0.00111328
																																				maximum	93.4055	56.1495	301.287	124.23	180.306	285.609	189.278	262.152	125.229		275.804	189.345	27.879
																																				threshold	0.0008	0.0029	0.0001	0.0001	0.0001	1e-07	0.0115	0.0008	0.0008		0.0008	0.00179001	0.0011116
	amplitudes Wildtype																b-wave
	a-wave													mean	SEM		wt													mean	SEM
	No		1508	1549	1555	1541	1556	1557	1561	1563	1564	1565	1558				No		1508	1549	1555	1541	1556	1557	1561	1563	1564	1565	1558
	exp.date		44271	44274	44274	44281	44288	44288	44302	44302	44302	44302	44316				exp.date		44271	44274	44274	44281	44288	44288	44302	44302	44302	44302	44316						Amplitudes WT													mean	SEM
	DOB		44053	44057	44053	44053	44053	44053	44054	44054	44054	44054	44054				DOB		44053	44057	44053	44053	44053	44053	44054	44054	44054	44054	44054						No		1508	1549	1555	1541	1556	1557	1561	1563	1564	1565	1558
	age (d)		216	215	219	226	232	232	245	245	245	245	259	234.455			age (d)		216	215	219	226	232	232	245	245	245	245	259	234.455					exp.date		2021-03-16	2021-03-19	2021-03-19	2021-03-26	2021-04-02	2021-04-02	2021-04-16	2021-04-16	2021-04-16	2021-04-16	2021-04-30
	Attenuator	cds/m²	not done														Attenuator	cds/m²	not done																DOB		2020-08-10	2020-08-14	2020-08-10	2020-08-10	2020-08-10	2020-08-10	2020-08-11	2020-08-11	2020-08-11	2020-08-11	2020-08-11
	30	0.0001		0.719196	1.57319	4.90419	7.82672	-4.4402	33.9574	6.11901	9.31464	-2.59424	3.52738	6.09073	3.38876		30	0.0001		9.24972	10.4284	3.2659	20.1788	6.43095	32.83	6.70468	5.51593	12.0213	2.21729	10.8843	2.92774				age (d)		216	215	219	226	232	232	245	245	245	245	259	234.455
	29	0.0008		6.74457	10.2201	-0.946069	-5.30267	-1.24339	13.0357	-3.08239	1.31131	6.56	7.73594	3.50331	1.94878		29	0.0008		99.2181	15.0108	46.1539	30.492	69.6321	100.438	59.7747	25.4295	96.7049	39.6763	58.2531	10.153				Attenuator	cds/m²	first experiment technically insufficient, outlier							incomplete dataset, animal died	filesave error
	28	0.0029		7.68547	3.17656	3.9726	8.86256	11.1933	7.39299	1.44671	2.28489	0.628768	24.998	7.16419	2.26761		28	0.0029		233.568	59.8947	95.4466	108.163	141.163	202.276	68.1757	57.9121	249.716	108.656	132.497	22.7069				30	0.0001		47.6323	42.896	0.438385	1.92508	3.57655	37.59			32.7097	1.10028	20.9835	7.42494
	25	0.0115		19.108	6.09948	1.15331	17.7512	10.4291	0.0523519	-5.68954	6.59241	9.8297	1.75397	6.708	2.47898		25	0.0115		305.5	89.9426	136.825	138.364	181.404	274.11	96.7239	73.1149	345.783	158.851	180.062	30.2962				29	0.0008		69.7268	179.193	103.342	95.085	73.7938	157.225			230	1.3911	113.72	25.461
	21	0.0279		22.7345	8.01382	10.1676	-0.308876	10.8562	42.5767	8.5734	10.0388	12.2418	7.75686	13.2651	3.71165		21	0.0279		312.386	87.0205	139.945	138.074	189.878	241.887	105.991	89.3693	360.102	155.57	182.022	29.8412				28	0.0029		105.131	310.904	84.1866	151.799	90.8647	150.495			286.228	16.305	149.489	35.898
	15	0.0661		25.4471	19.5721	24.7078	21.017	16.0045	20.7165	-5.72969	19.7258	40.7112	10.3969	19.2569	3.72271		15	0.0661		320.976	84.3502	141.209	148.501	193.997	233.155	109.303	83.6424	353.951	156.879	182.596	29.7303				25	0.0115		150.952	325.562	75.5838	195.712	105.871	200.354			382.514	78.7219	189.409	40.0116
	0	0.24775		91.3829	30.4604	39.9368	38.6186	45.9211	96.421	23.626	28.0117	90.5325	25.9856	51.0896	9.35917		0	0.24775		374.889	102.144	143.315	150.684	212.634	284.529	118.18	87.6981	368.499	160.541	200.311	33.7254				21	0.0279		94.4371	272.137	125.928	193.443	103.986	181.63			556.667	192.128	215.045	52.9312
																																			15	0.0661		106.17	259.164	126.119	236.283	96.414	199.443			650.774	95.3826	221.219	65.5131
																																			0	0.24775		77.3152	213	156.536	242.391	57.3167	189.791			555.711	148.234	205.037	54.8336
																																			maximum amplitude			150.952	325.562	156.536	242.391	105.871	200.354			650.774	192.128	253.071	61.4476
																																			threshold			0.0001	0.0001	0.0008	0.0001	0.0001	0.0008			0.0001	0.0029	0.000625	0.000343693
