# Supplementary material for: Progressive axonopathy when oligodendrocytes lack the myelin protein CMTM5
Source: eLife. 2022 Mar 11;11:e75523. doi: 10.7554/eLife.75523 (PMC8916772; doi:10.7554/eLife.75523)
Supplement: Figure 6—source data 1. [file elife-75523-fig6-data1.xlsx]

## Sheet: Sheet1
Figure 6 C					Figure 6 F
P75		P365
Cmtm5 Wt (n=6)	Cmtm5-/- (n=5)	Cmtm5 Wt (n=4)	Cmtm5-/- (n=5)		CTRL	Cmtm5 iKO
0.3	1.3	1.28598	7.54579		0.322234	2.18403
0.7	4.6	0.853375	8.35418		0.214823	1.79019
0.4	0.9	0.432744	7.77058		0.322234	1.07411
0.3	6	1.83281	11.4264		0.0716076	2.97172
0.4	5.8		11.003		0.429646	0.501253
0.6
