# Supplementary material for: Progressive axonopathy when oligodendrocytes lack the myelin protein CMTM5
Source: eLife. 2022 Mar 11;11:e75523. doi: 10.7554/eLife.75523 (PMC8916772; doi:10.7554/eLife.75523)
Supplement: Figure 7—source data 1. [file elife-75523-fig7-data1.xlsx]

## Sheet: Sheet1
Fig 7 C
Inner retina		Middle retina		Outer Retina
CTRL (n=4)	Cmtm5 cKO (n=3)	CTRL (n=4)	Cmtm5 cKO (n=3)	CTRL (n=4)	Cmtm5 cKO (n=3)
3313	3293	2190	1845	816	1054
2975	1718	2937	2183	2246	959
2549	2654	2582	2778	1736	1615
1818		2218		1938
Fig 7 E
Cmtm5 Wt		Cmtm5 KO
WLDS wt	WLDS +	WLDS wt	WLDS +
0.325733	0.375657	5.30973	3.63206
0.213523	0.158562	5.23746	2.98815
1.25448	0.608045	6.08646	1.00768
0.518732	0.464684	5.3859	3.89671
		7.14746	2.82651
